# Supplementary material for: 5 V-Class 35.3 mAh cm-2 All-Solid-State Li Batteries
Source: Research Square preprint supplement (doi:10.21203/rs.3.rs-4828390/v1), 2025-02-05
Supplement: Supplementary file 1 [file 00bacb2c95f8bfb035072b59.docx]

[Supplementary Information]

5 V-Class 35.3 mAh cm-2 All-Solid-State Li Batteries

Jun Pyo Son,1,⊥ Juhyoun Park,1,⊥ Hae-Yong Kim,2,⊥ Jae-Seung Kim,3,⊥ Yong Bae Song,1 Changhoon Kim,1 Donghyeok Kim,1 Jong Seok Kim,1 Sunho Ko,2 Docheon Ahn,4 Keun Hwa Chae,4,5 Gihan Kwon,6 Dominik Wierzbicki,6 Yonghua Du,6 Dong-Hwa Seo,*3 Kyung-Wan Nam,*2 and Yoon Seok Jung*1

1 Department of Chemical and Biomolecular Engineering, Yonsei University, Seoul 03722, South Korea

2 Department of Energy and Materials Engineering, Dongguk University, Seoul, 04620, South Korea

3 Department of Materials Science and Engineering, Korea Advanced Institute of Science and Technology (KAIST), Daejeon 34141, South Korea

4 Beamline Division, Pohang Accelerator Laboratory, Pohang 37673, South Korea

5 Advanced Analysis Centre, Korea Institute of Science and Technlogy, Seoul, 02792, South Korea

6 National Synchrotron Light Source II, Brookhaven National Laboratory, Upton, NY, 11973, USA

⊥ These authors contributed equally.

Corresponding Authors: *e-mail: dseo@kaist.ac.kr (Prof. D.-H. Seo), knam@dongguk.edu (Prof. K.-W. Nam), yoonsjung@yonsei.ac.kr (Prof. Y. S. Jung)

**Table of Contents**

1. List of Abbreviations
2. Supplementary Figures
3. Supplementary Tables
4. Supplementary References

**1. List of Abbreviations**

- ASSB: All-solid-state battery
- SE: Solid electrolyte
- LPSCl: Li6PS5Cl
- CAM: Cathode active material
- *R*ion: Ionic resistance in composite electrode
- LNMO: LiNi0.5Mn1.5O4
- LNbO: LiNbO3
- LiCl–4LTF: LiCl–4Li2TiF6
- LCMO: LiCoMnO4
- LFMO: LiFe0.5Mn1.5O4
- HRPD: High-resolution powder diffraction
- TEY: Total electron yield
- XAS: X-ray absorption spectroscopy
- XANES: X-ray absorption near-edge structure
- EXAFS: Extended X-ray absorption fine structure
- PDF: Pair distribution function
- DFT: Density functional theory
- XPS: X-ray photoelectron spectroscopy
- XRF: X-ray fluorescence
- AIMD: Ab-initio molecular dynamics
- CV: Cyclic voltammetry
- LYC: Li3YCl6
- ZrO2–LZCF: ZrO2–2Li2ZrCl5F
- SEM: Scanning electron microscopy
- EDXS: Energy dispersive Xray spectroscopy
- LiCl–4LTF–LNMO: LiCl–4Li2TiF6-coated LiNi0.5Mn1.5O4
- b–LNMO: Bare LiNi0.5Mn1.5O4
- LNbO–LNMO: LiNbO3-coated LiNi0.5Mn1.5O4
- EIS: Electrochemical impedance spectroscopy
- SOC: State-of-charge
- HRTEM: High-resolution transmission electron microscopy
- FFT: Fast Fourier transform
- TOFSIMS: Time-of-flight secondary ion mass spectrometry
- PTFE: Poly(tetrafluoroethylene)
- NCM88: LiNi0.88Co0.11Mn0.01O2
- ICP-OES: inductively coupled plasma optical emission spectroscopy
- FTIR: Fourier transform infrared spectroscopy

**2. Supplementary Figures.**


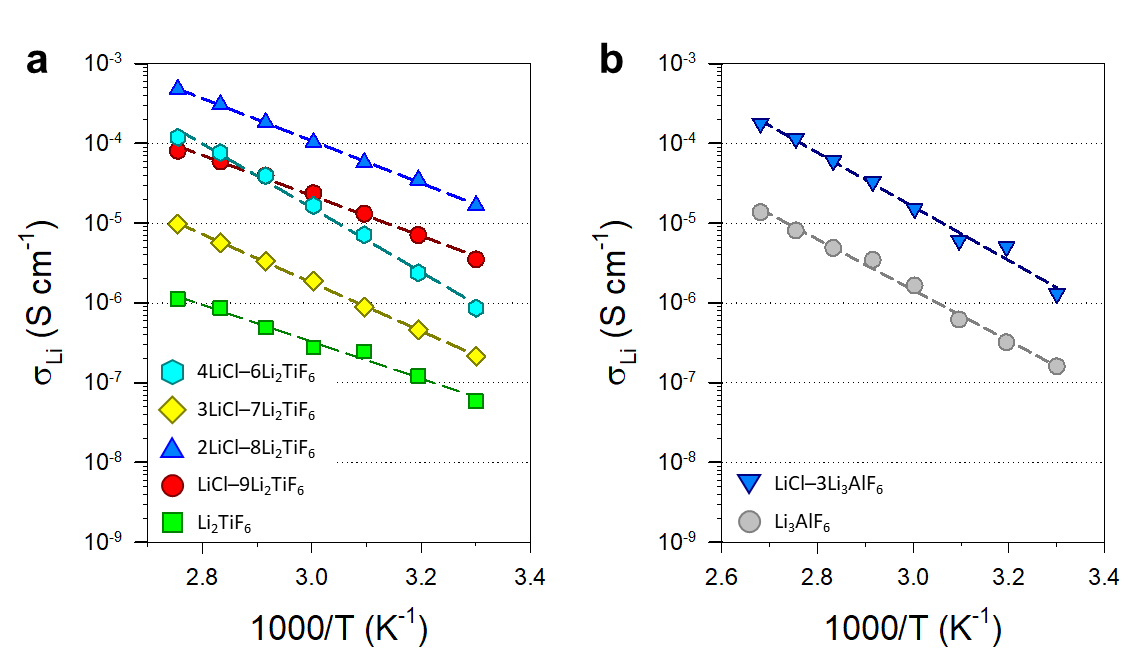


**Supplementary Fig. 1** **a,b,** Arrhenius plots of Li+ conductivity for *x*LiCl−(1-*x*)Li2TiF6 (*x* = 0, 0.1, 0.2, 0.3, 0.4) (**a**) and *y*LiCl−(1-*y*)Li3AlF6 (*y* = 0, 0.25) (**b**).


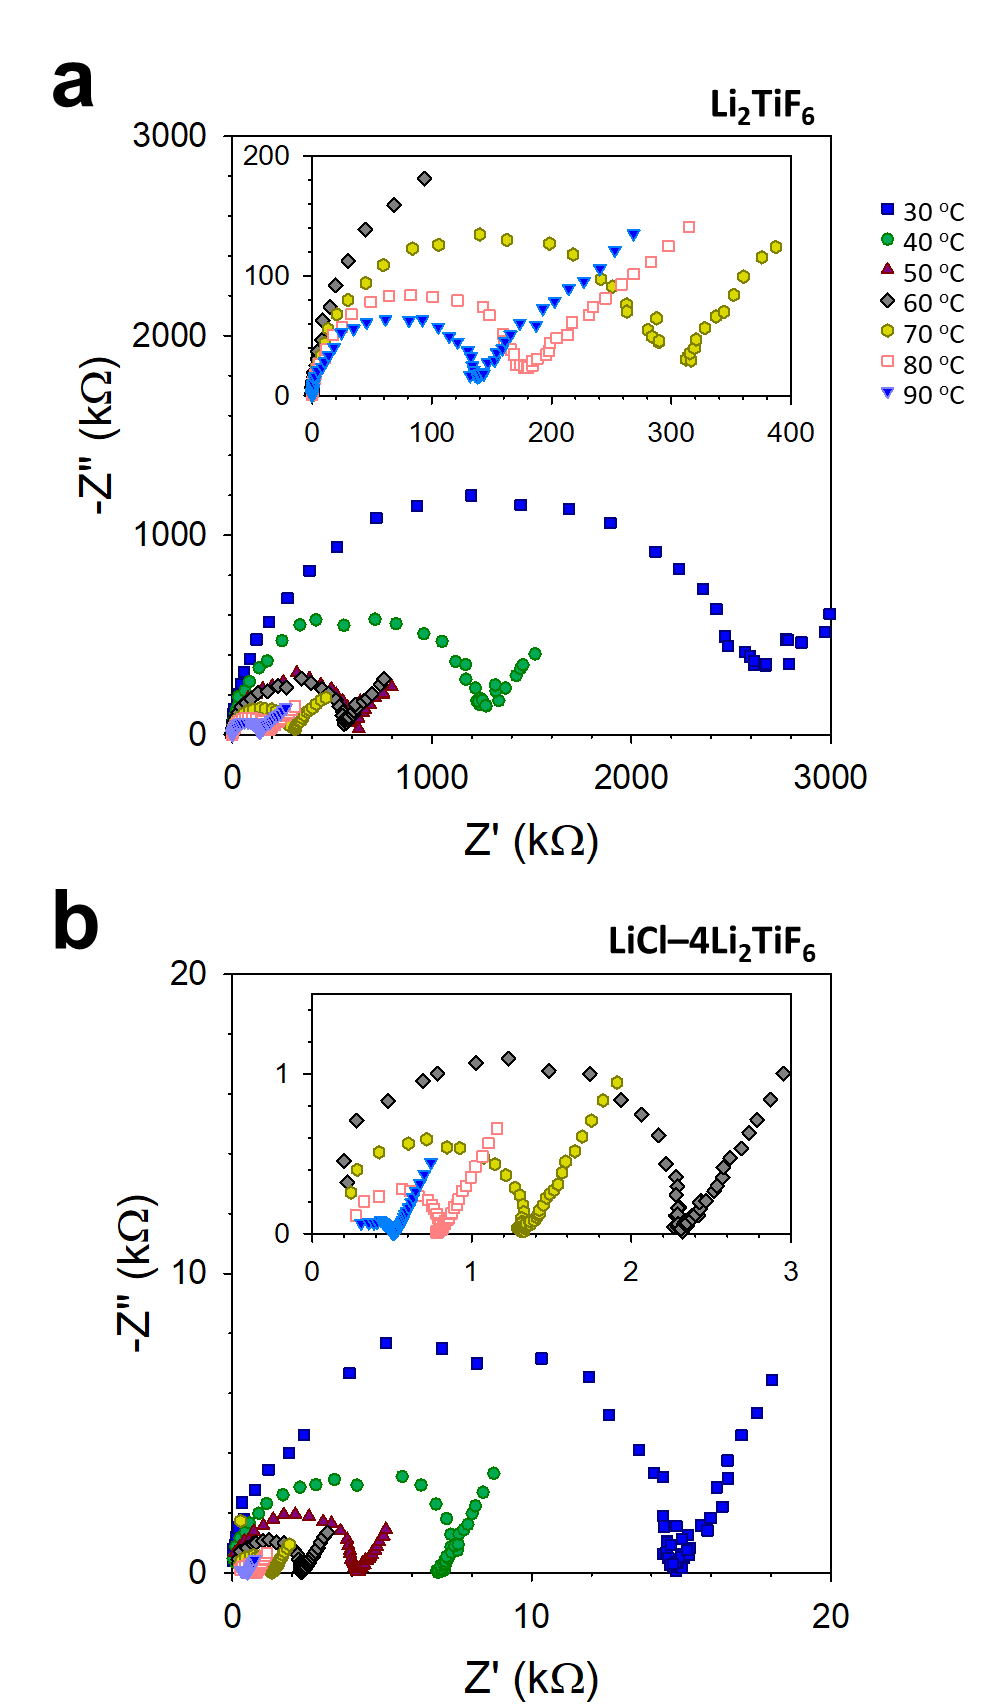


**Supplementary Fig. 2 a,b,** Nyquist plots of Li+-blocking Ti|SE|Ti symmetric cells for Li2TiF6 (**a**) and LiCl−4Li2TiF6 (**b**) at different temperatures.


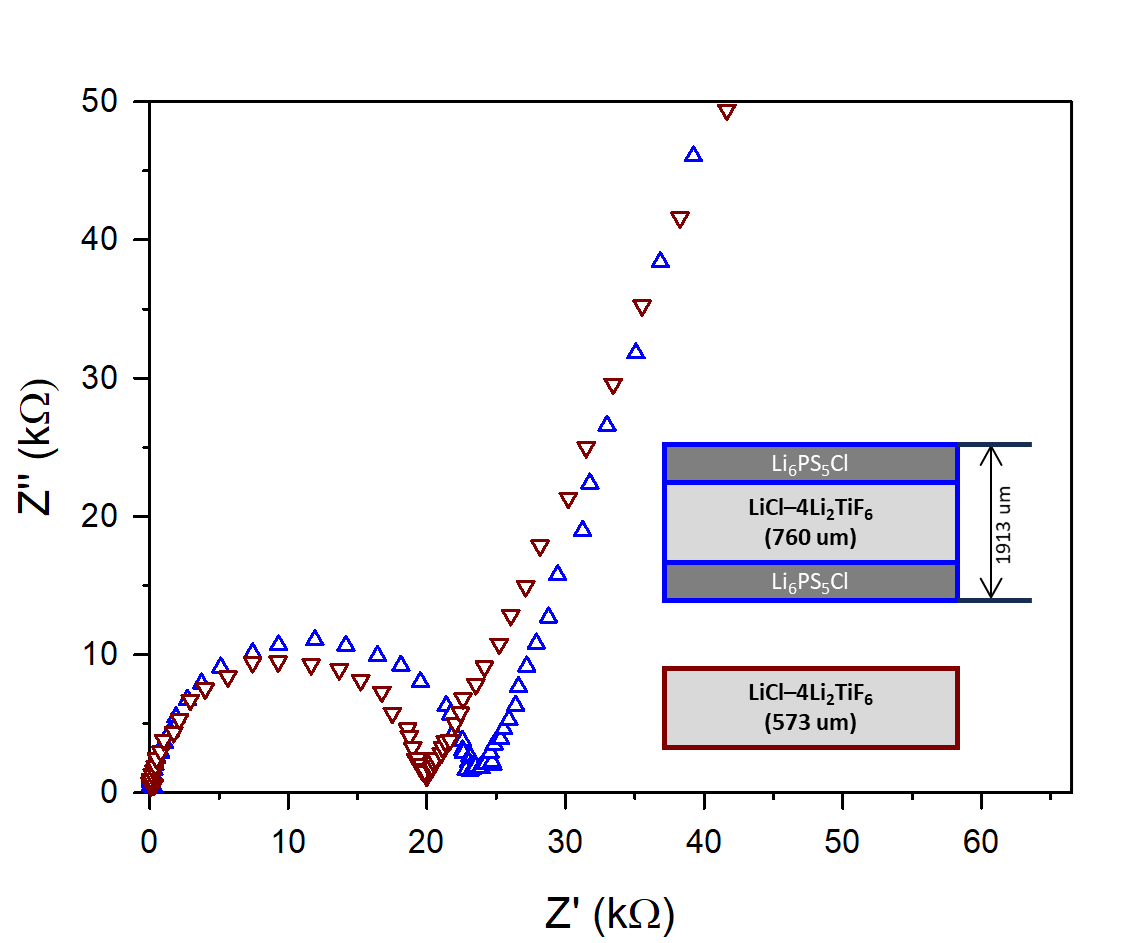


**Supplementary Fig. 3 Confirmation of Li+ conductivity in LiCl**−**4LTF.** Comparison of Nyquist plots of Ti|(LiCl−4LTF)|Ti and Ti|LPSCl|(LiCl−4LTF)|LPSCl|Ti cells at 30 °C.

**Supplementary Note 1.** The LPSCl layers in the Ti|LPSCl|(LiCl−4LTF)|LPSCl|Ti cell block F- conduction, which ensures that the conductivity result is solely attributed to Li+. Note that both measurements yielded identical Li+ conductivities, indicating the negligible contribution of F- conductivity to the overall ionic conductivity of LiCl−4LTF.


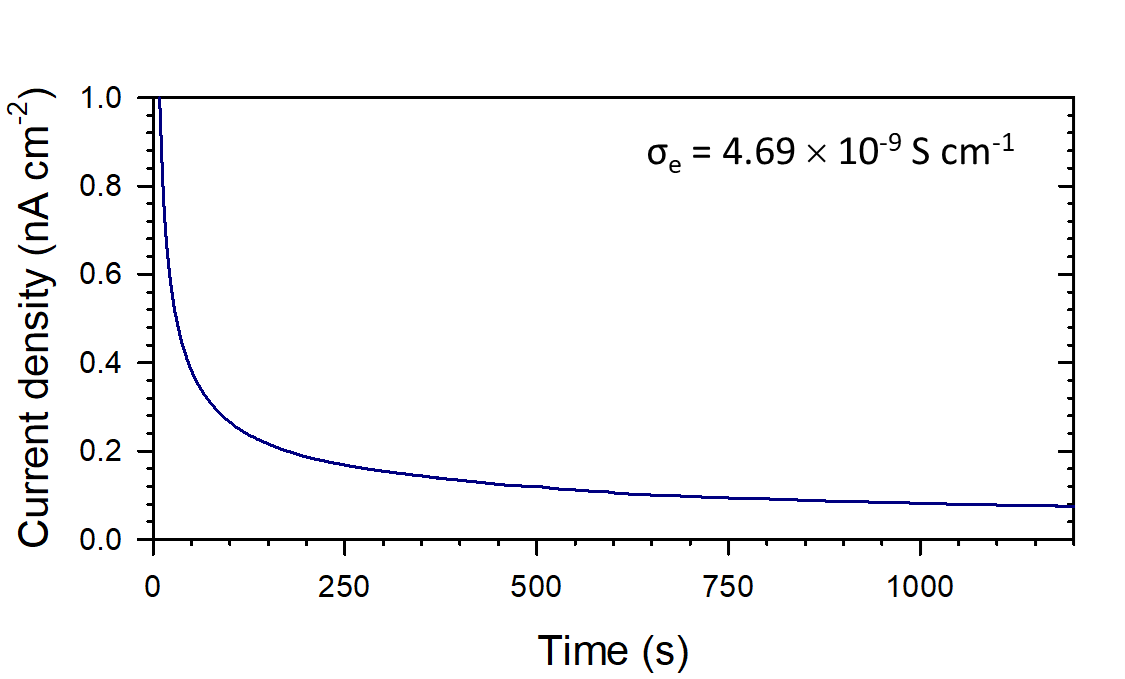


**Supplementary Fig. 4 e- conductivity result of LiCl**−**4LTF.** Chronoamperometry result of Li+-blocking Ti|(LiCl−4LTF)|Ti symmetric cells with a voltage step of 1 V.


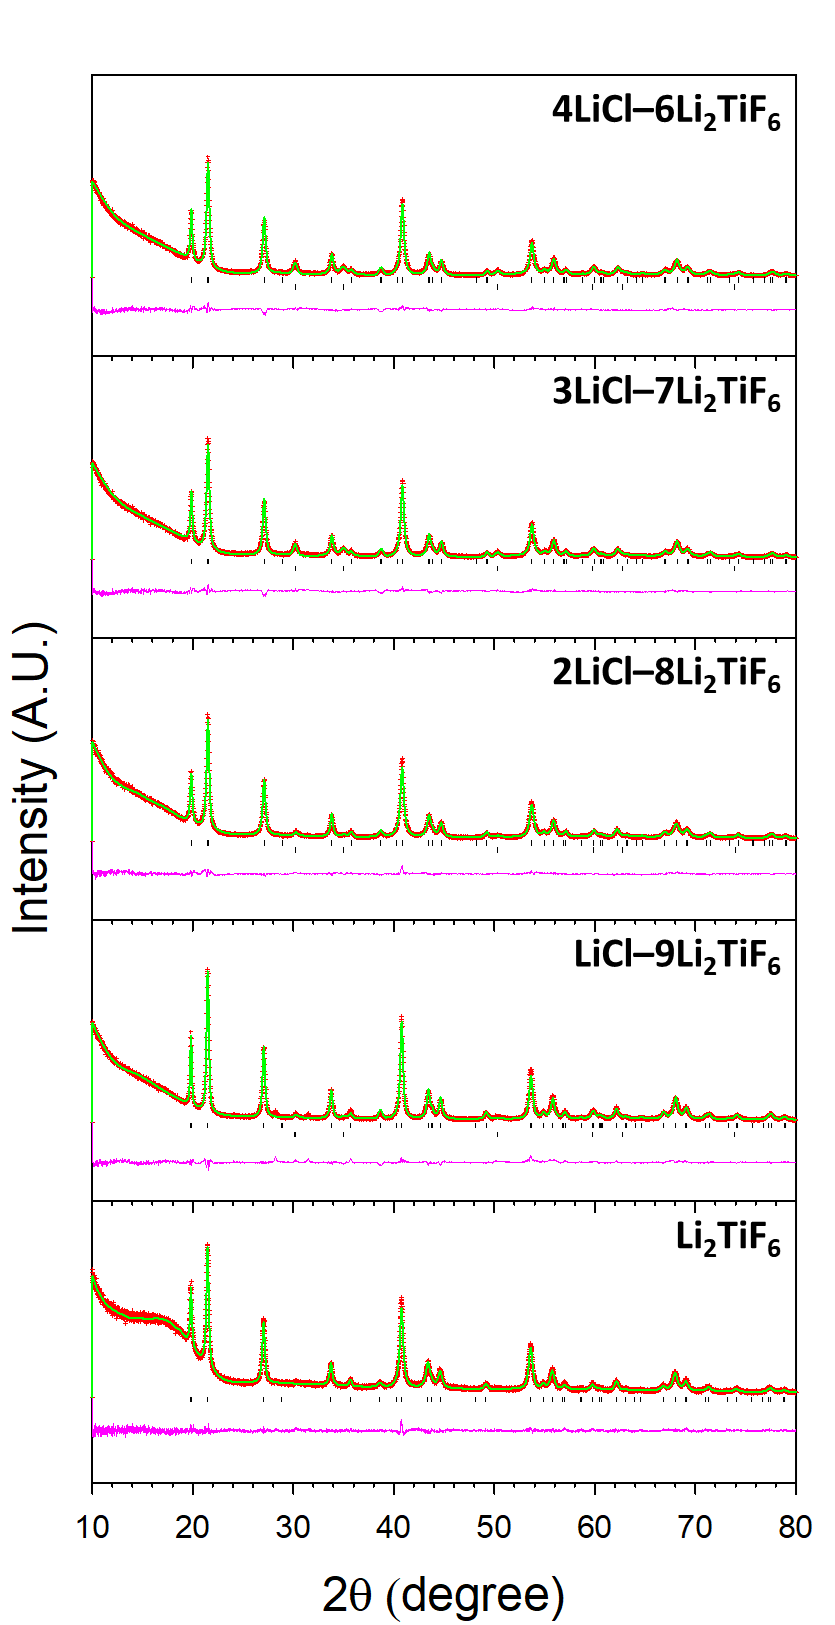


**Supplementary Fig. 5 HRPD Rietveld refinement results.** Observed and calculated HRPD Rietveld refinement profiles of *x*LiCl−(1-*x*)Li2TiF6 (*x* = 0, 0.1, 0.2, 0.3, 0.4). The detailed results are summarized in Supplementary Tables 5-9.

**Supplementary Note 2**. Rietveld refinement was conducted on a mixture of LiCl and Li2TiF6-*y*Cl*y* (*x*LiCl–(1-*x*)Li2TiF6-*y*Cl*y*), with x and y varied. To explore the possible anion ligand exchanges between LiCl and Li2TiF6, refinement was also attempted with *x*LiCl1-*z*F*z*–(1-*x*)Li2TiF6-*y*Cl*y*, with various x, y, and z, although the fitting was not successful. Based on Supplementary Table 26, the reaction energy with the formation of F2 gas (reaction 4) was also favorable. This was likely the reason for the unsuccessful refinement with *x*LiCl1-*z*F*z*–(1-*x*)Li2TiF6-*y*Cl*y*.

**
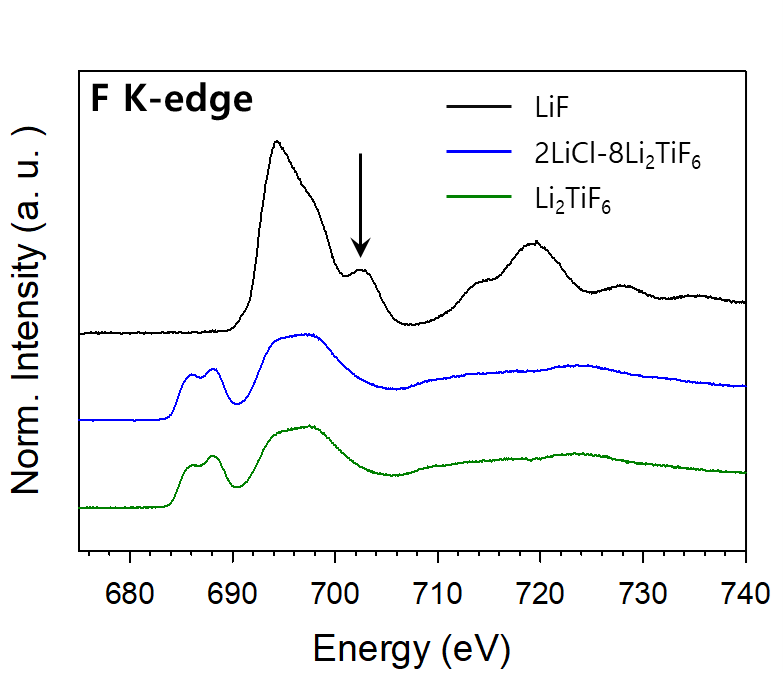
**

**Supplementary Fig. 6 F K-edge XAS spectra of LiF, Li2TiF6, and LiCl−4LTF.** The characteristic peak of LiF (701 eV) is absent in Li2TiF6 and LiCl-4LTF.


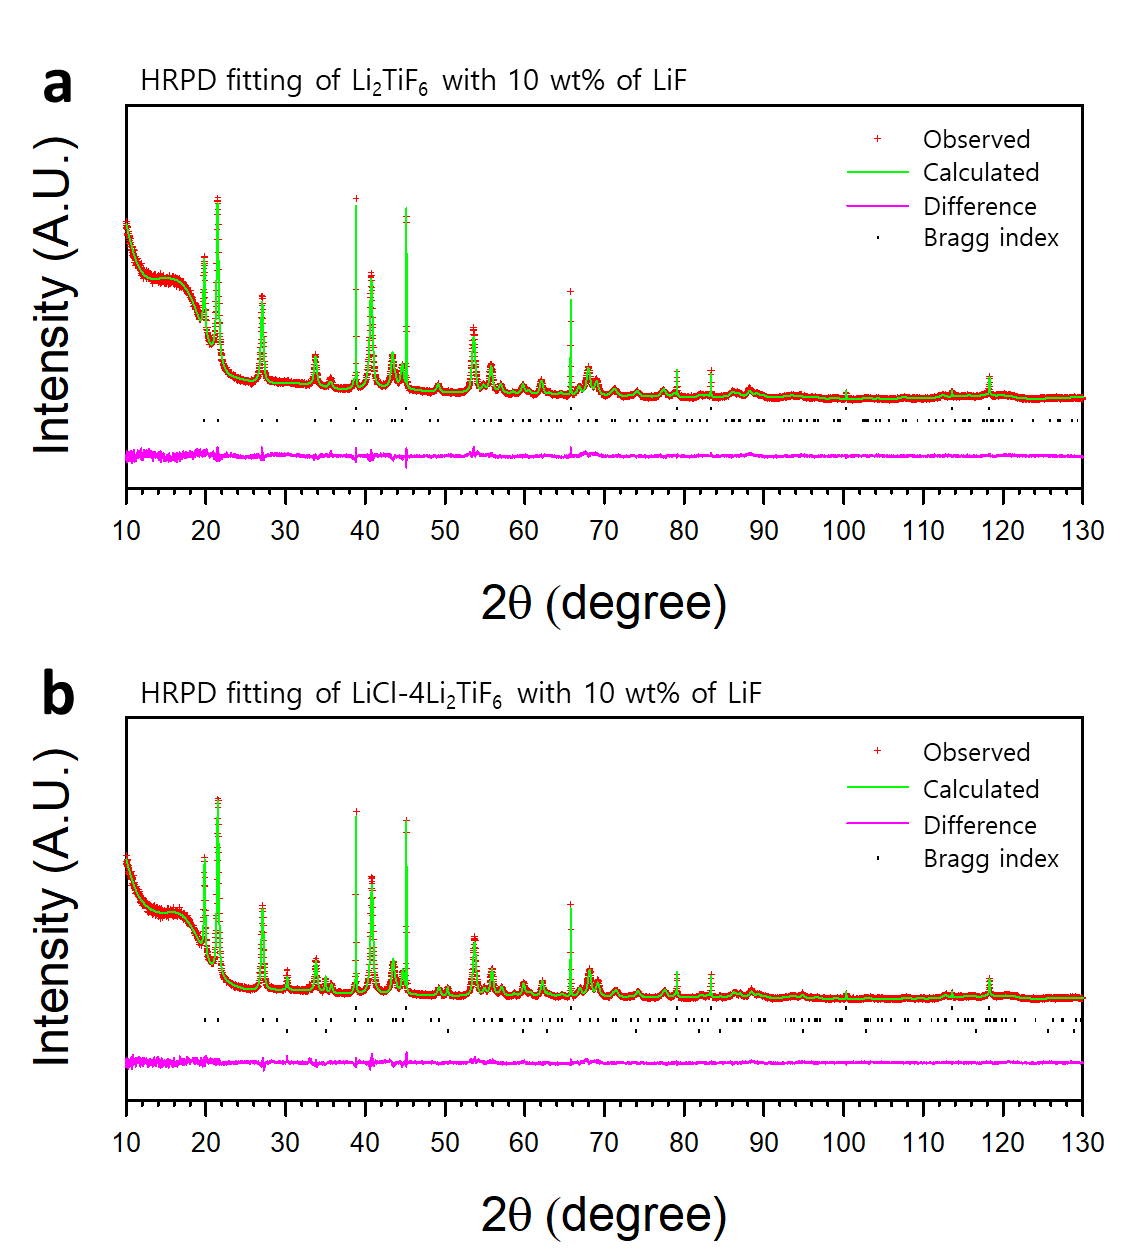


**Supplementary Fig. 7** **a**,**b,** Observed and calculated HRPD Rietveld refinement profiles for the mixtures of SE and LiF in a weight ratio of 10:1 for Li2TiF6 (**a**) and LiCl−4Li2TiF6 (**b**). The fitting results are presented in Supplementary Table 4.


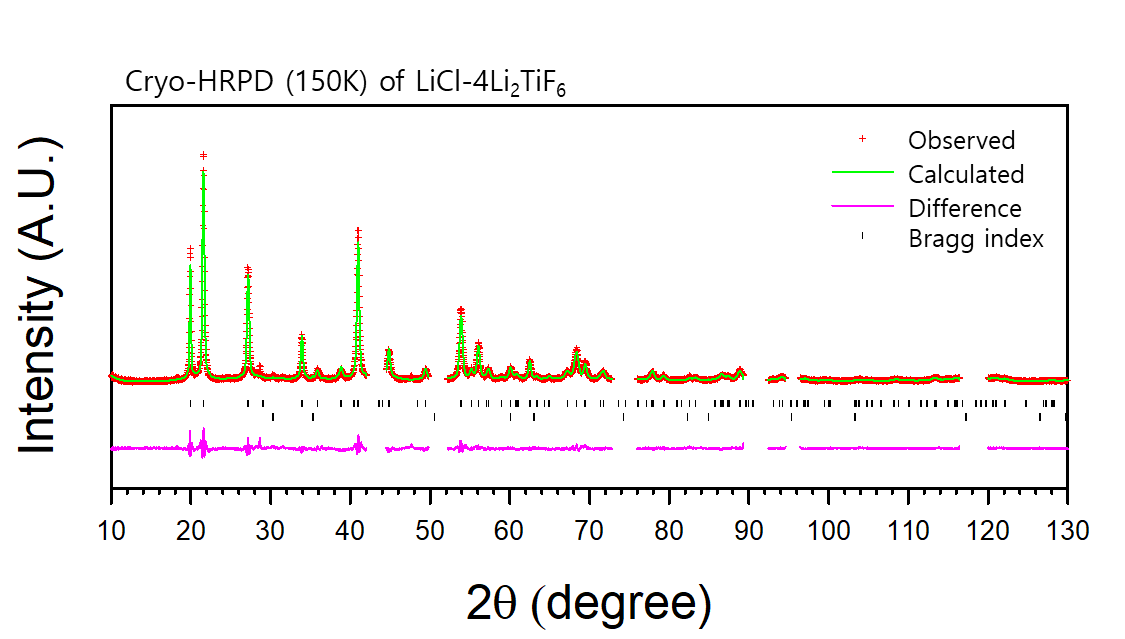


**Supplementary Fig. 8** **Cryo-HRPD Rietveld refinement result.** Observed and calculated HRPD Rietveld refinement profiles of LiCl−4Li2TiF6 at 150 K. The fitting was conducted excluding the Cu cryo-holder peaks (ICSD 15985) present at 43.5, 50.6, 74.4, 90.3, 95.6, and 117.6°. The detailed results are summarized in Supplementary Table 10.

**
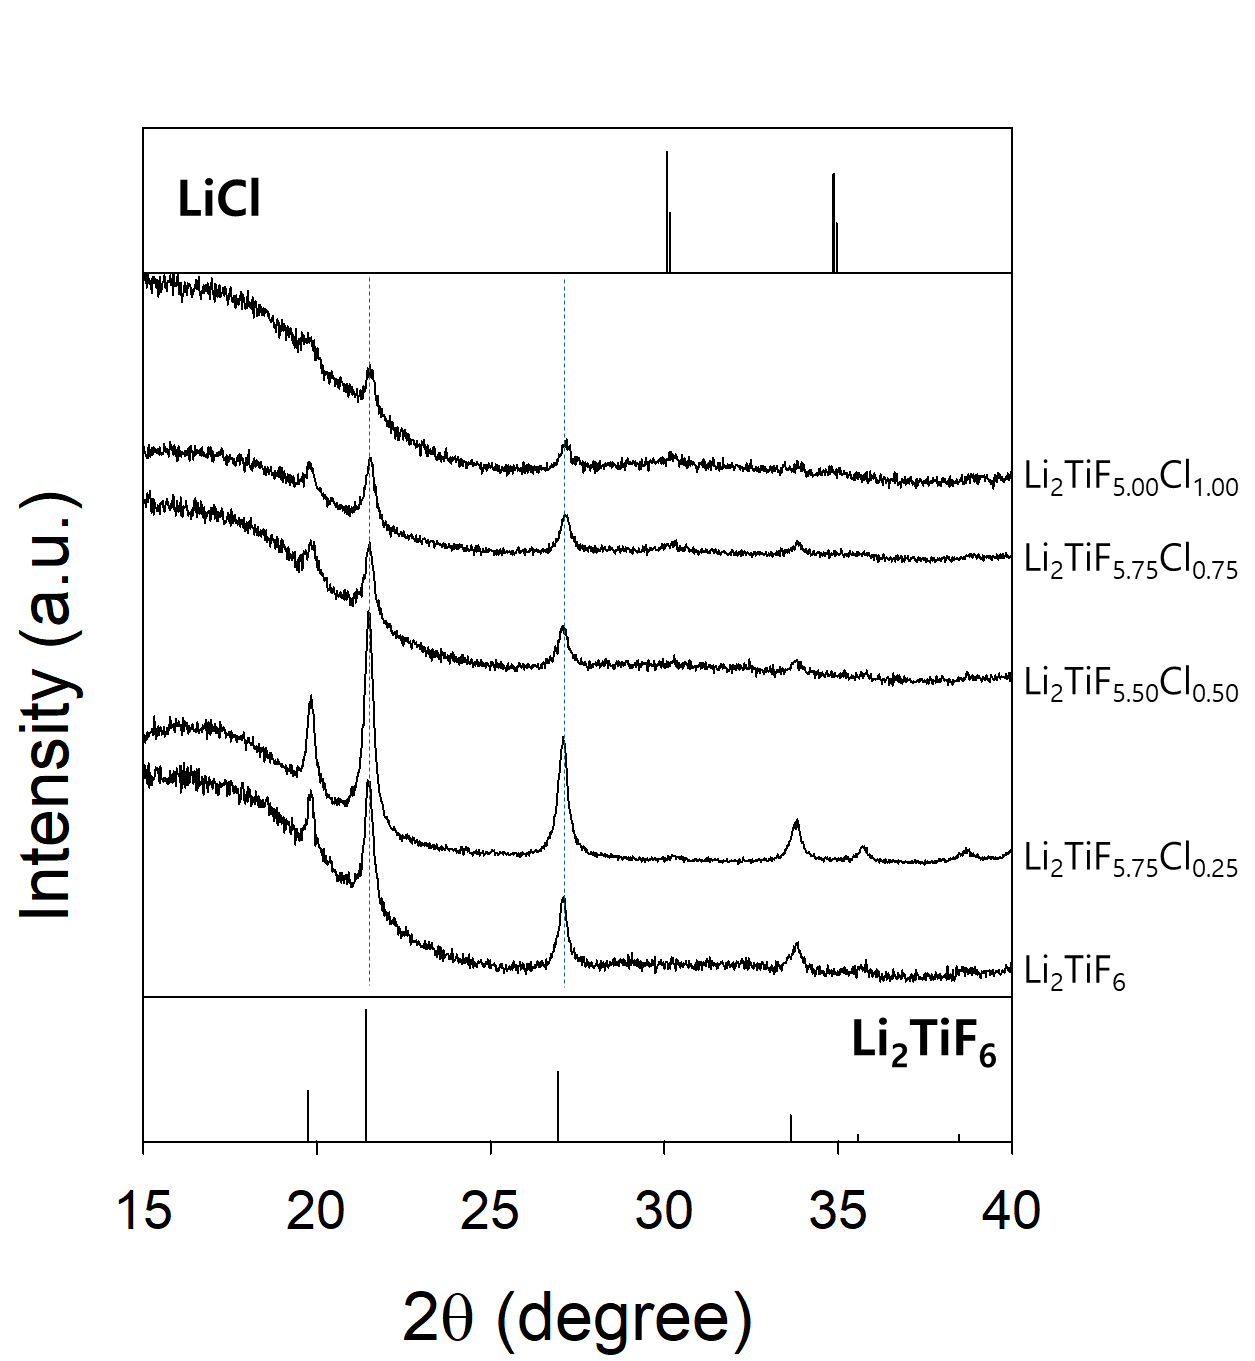
**

**Supplementary Fig. 9** HRPD patterns of a series of samples targeting Li2TiF6-xClx.

**Supplementary Note 3.** No shift in the Li2TiF6 peak was observed. However, combining the PDF (Supplementary Fig. 14) and Cl K-edge XAS results (**Fig. 1e**), we conclude that trace amounts of Cl were indeed substituted in the LTF structure, albeit marginally. Specifically, PDF analysis confirmed the absence of other phases, including any amorphous materials that could have Ti-Cl bond, except for LiCl and LTF, while Cl-Ti bonding was verified through the Cl K-edge XAS.


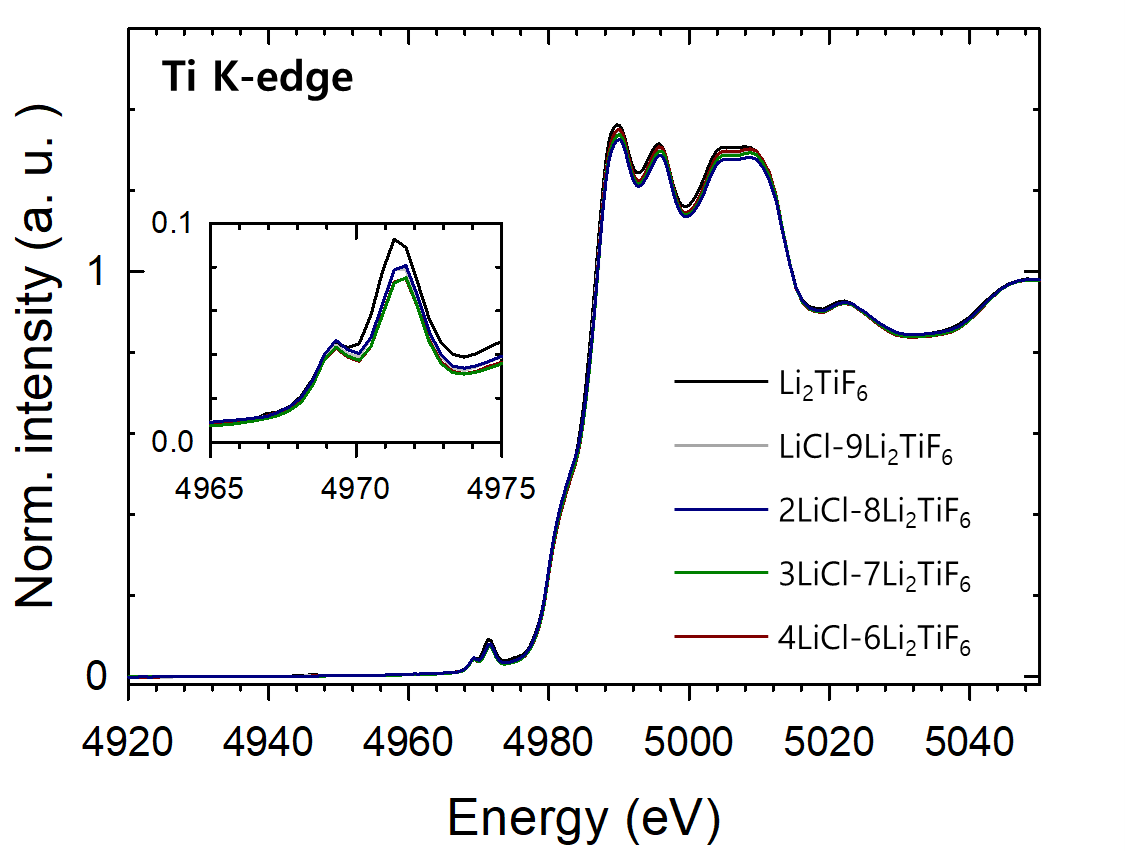


**Supplementary Fig. 10** Ti K-edge XANES spectra of *x*LiCl−(1-*x*)Li2TiF6, measured in transmission mode.


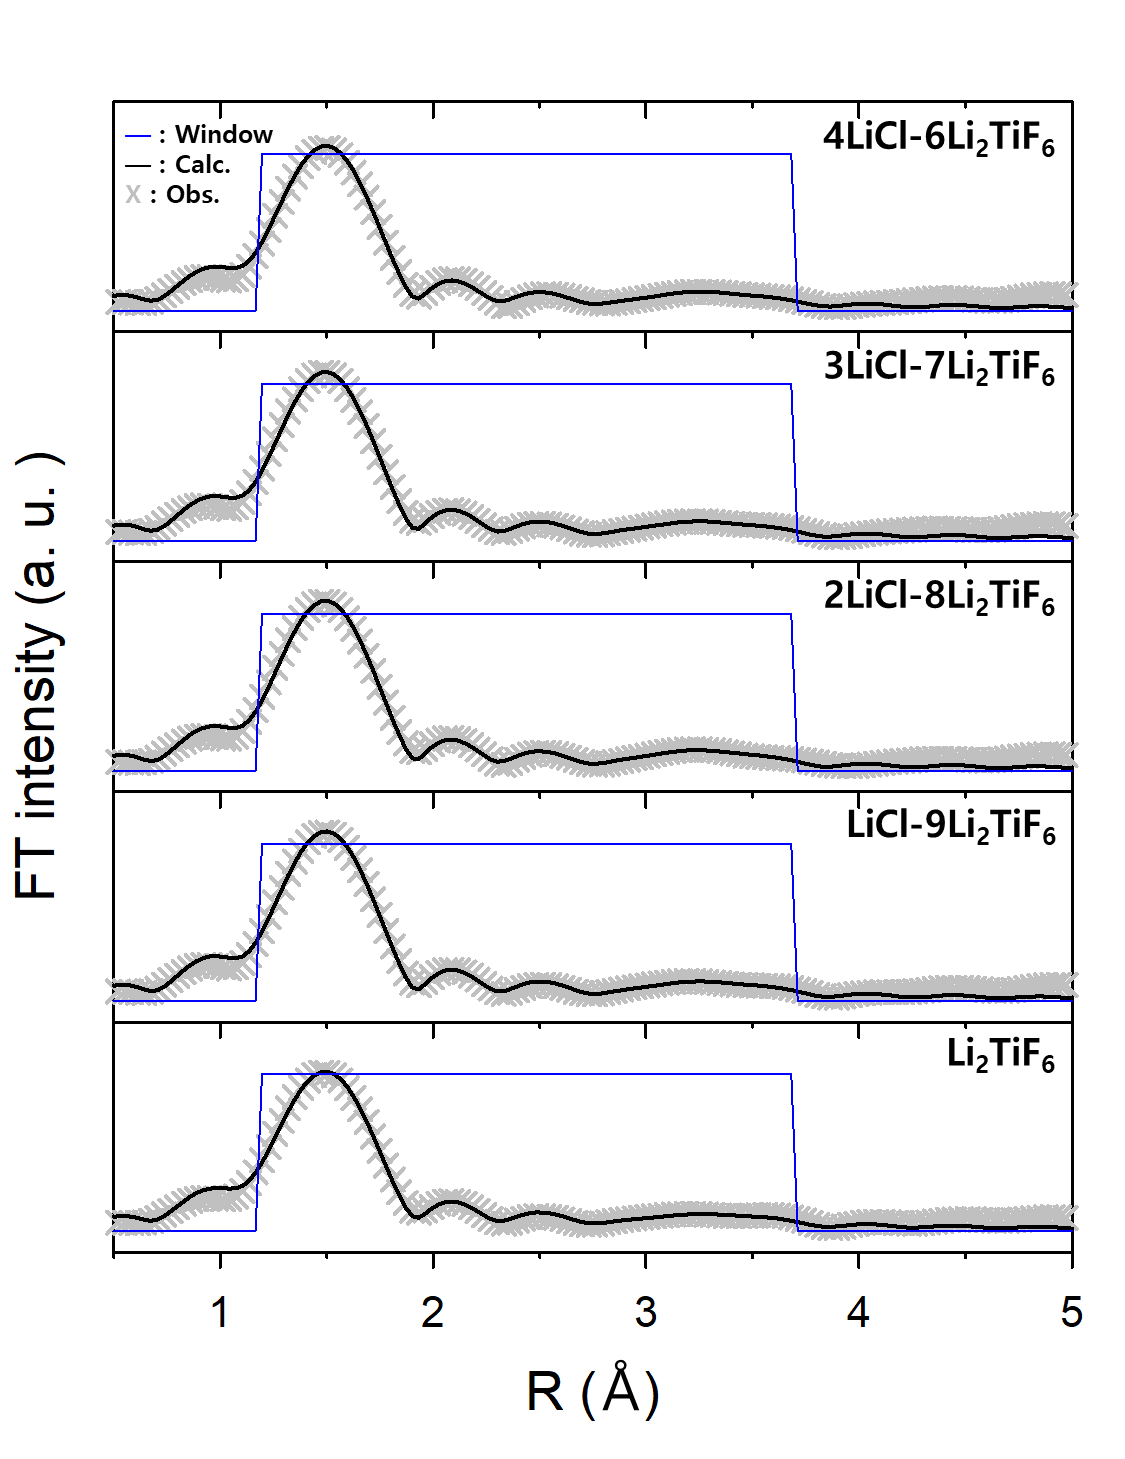


**Supplementary Fig. 11 Ti K-edge EXAFS results.** Observed and calculated Ti K-edge EXAFS fitting curves for *x*LiCl–(1-*x*)Li2TiF6 (*x* = 0, 0.1, 0.2, 0.3, 0.4). The detailed results are summarized in Supplementary Table 11.


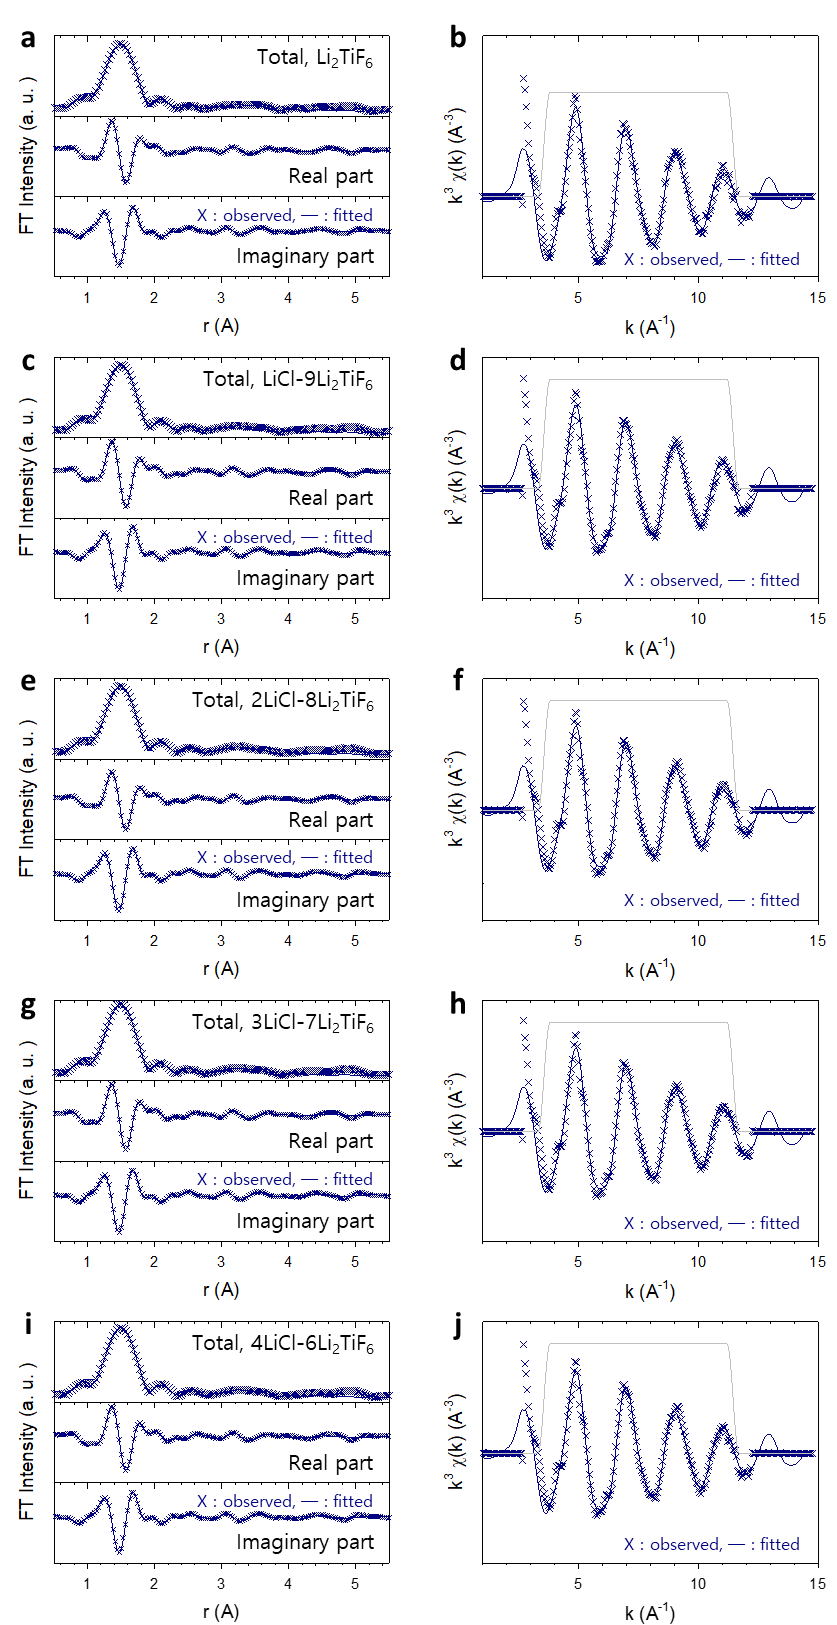


**Supplementary Fig. 12 a−j,** The real/imaginary part of FT (**a, c, e, g, i**) and (**b, d, f, h, j**) based on R-space curve fitting of *x*LiCl−(1-*x*)Li2TiF6 (*x* = 0, 0.1, 0.2, 0.3, 0.4). Li2TiF6 (**a, b**), LiCl-9Li2TiF6 (**c, d**), 2LiCl-8Li2TiF6 (**e, f**), 3LiCl-7Li2TiF6 (**g, h**), and 4LiCl-6Li2TiF6 (**i, j**).
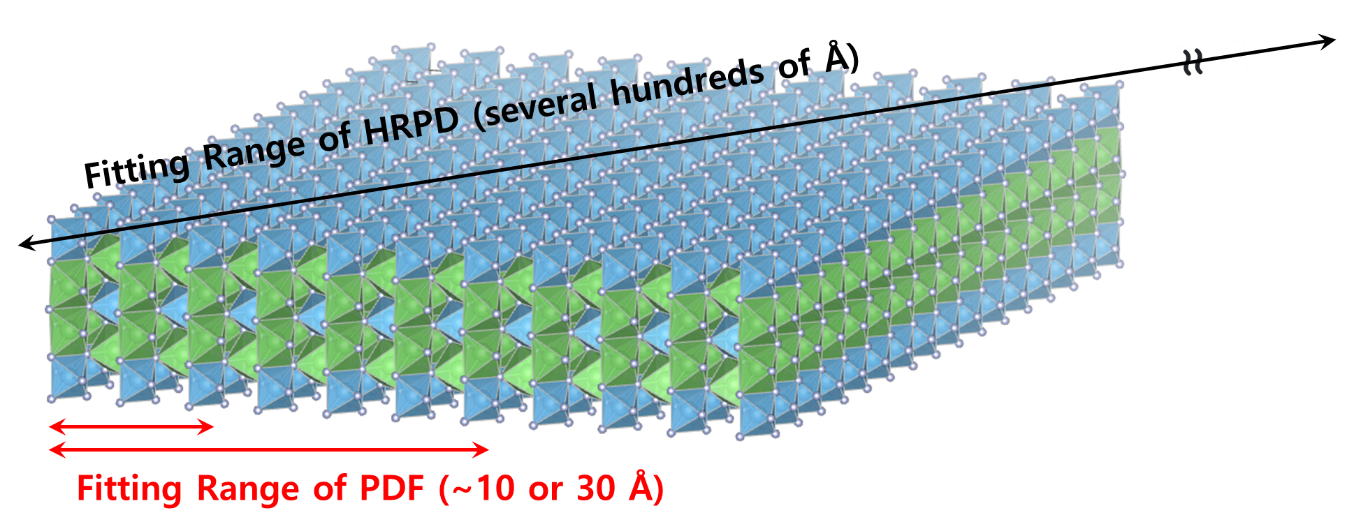


**Supplementary Fig. 13 Schematic of fitting range of PDF and HRPD.** The fitting ranges of PDF are much shorter than those of HRPD or XRD. Consequently, PDF fitting provides structural information, which is sensitive to distinct interfaces.

**
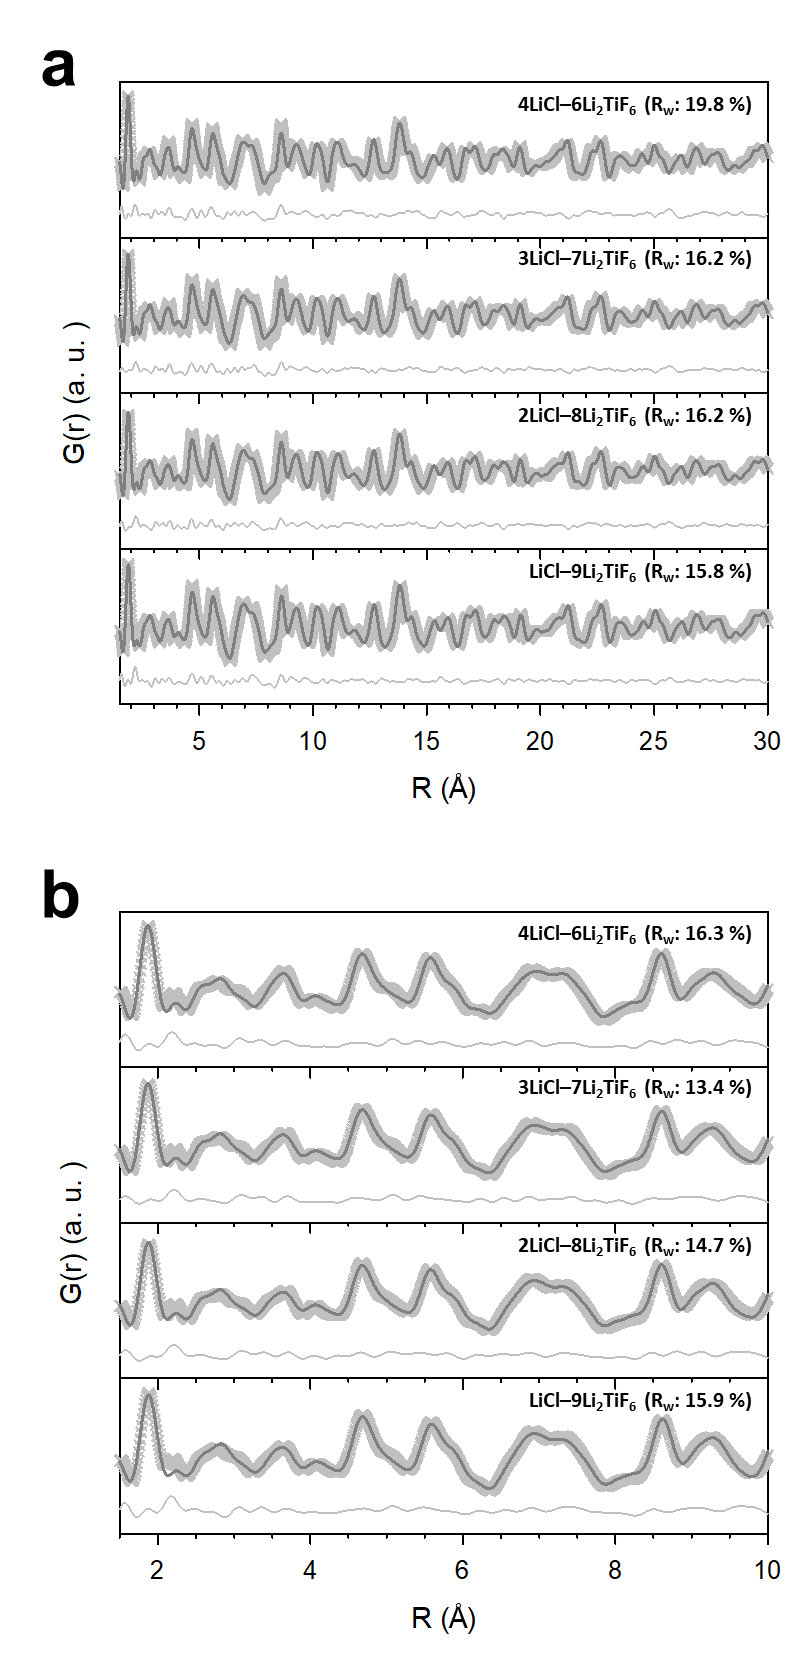
**

**Supplementary Fig. 14 PDF fitting results. a**,**b,** Observed and calculated PDF G(r) with best fit for *x*LiCl–(1-*x*)Li2TiF6 (*x* = 0, 0.1, 0.2, 0.3, 0.4) in the range of 1.5–30 Å (**a**) or 1.5–10 Å (**b**).


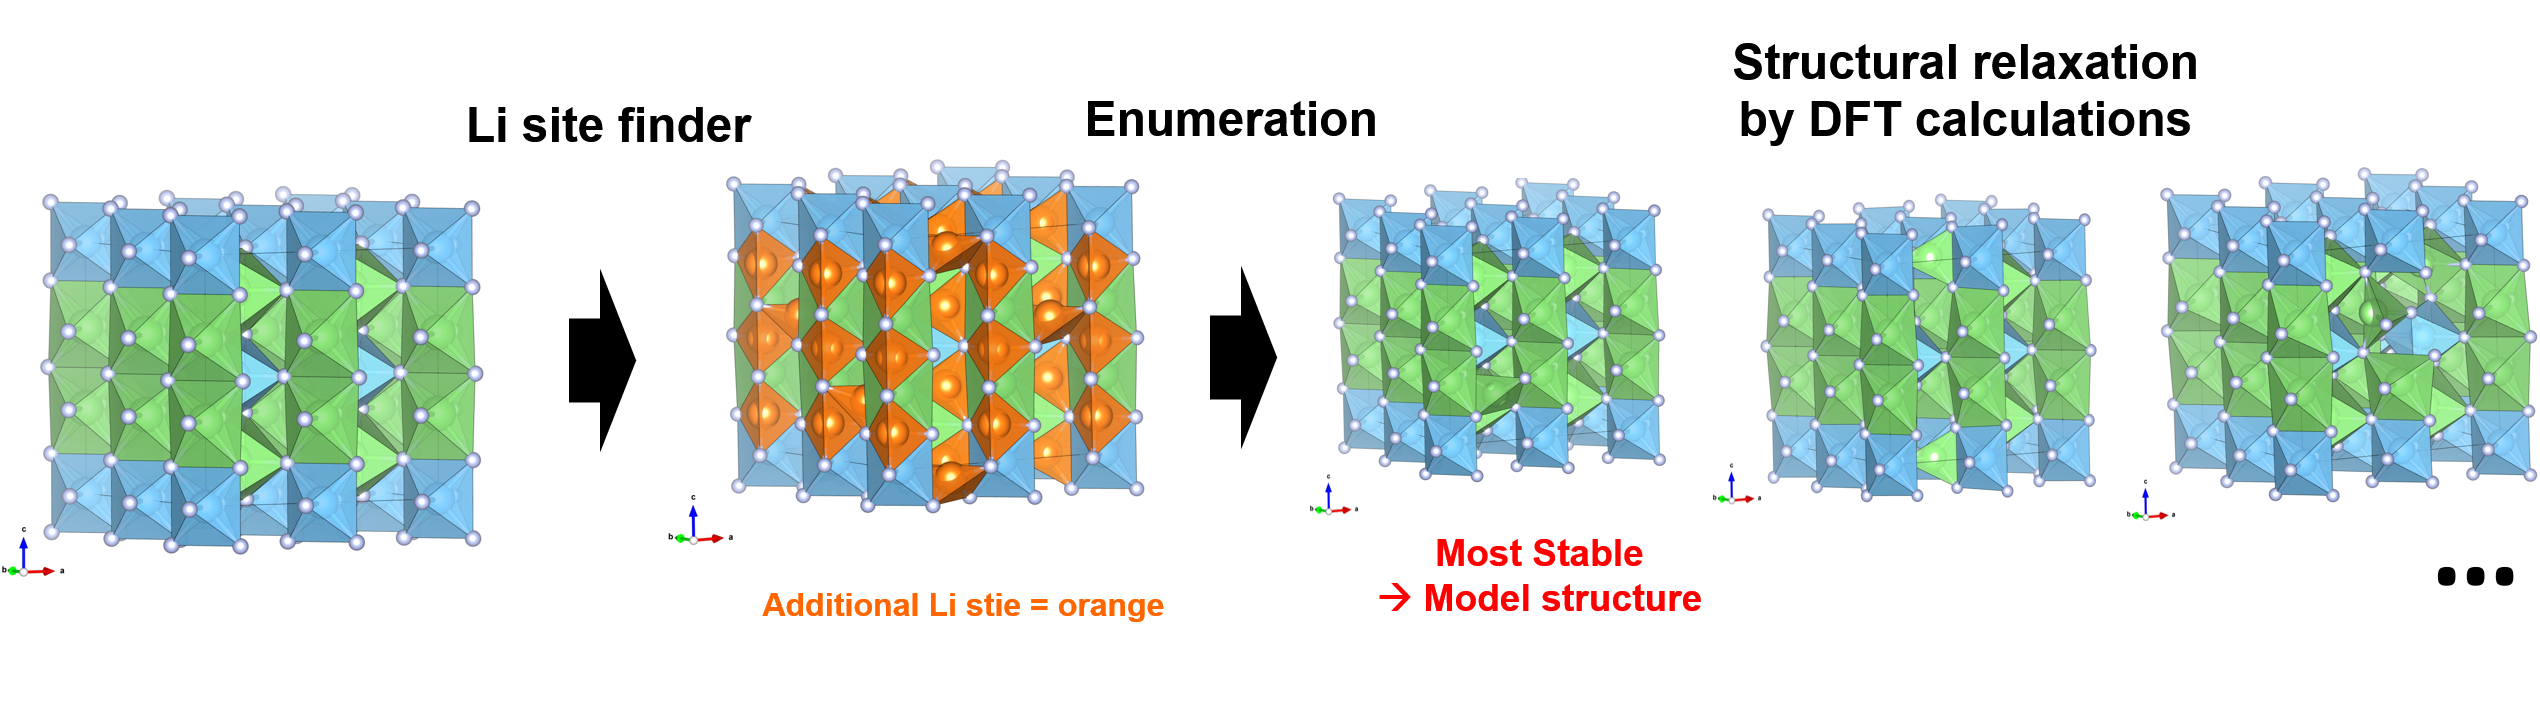


**Supplementary Fig. 15** Enumeration process of crystal structure of Li2+xTiF6.


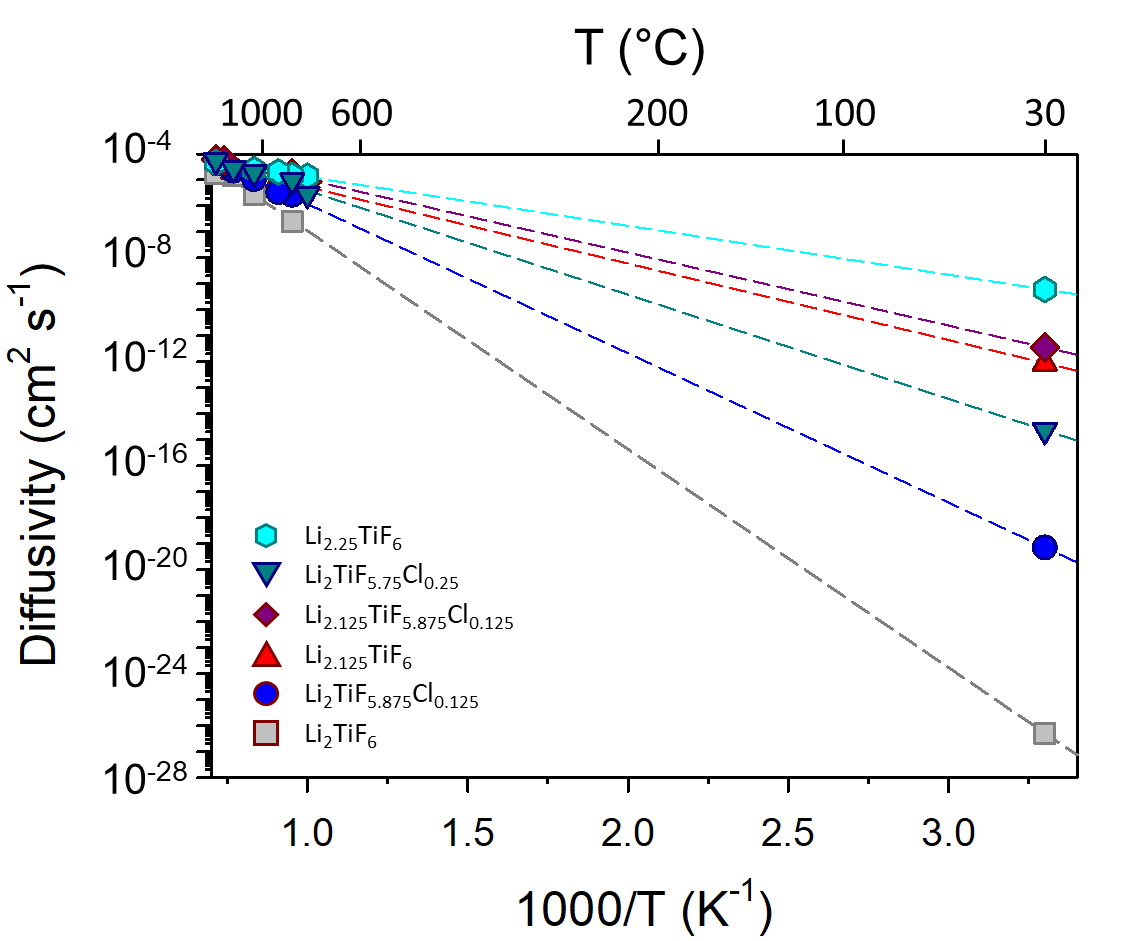


**Supplementary Fig. 16** Arrhenius plots of AIMD simulations of Li2TiF6, Li2.125TiF6 (with Li2.25TiF6), Li2TiF5.875Cl0.125 (with Li2TiF5.75Cl0.25) and Li2.125TiF5.875Cl0.125.


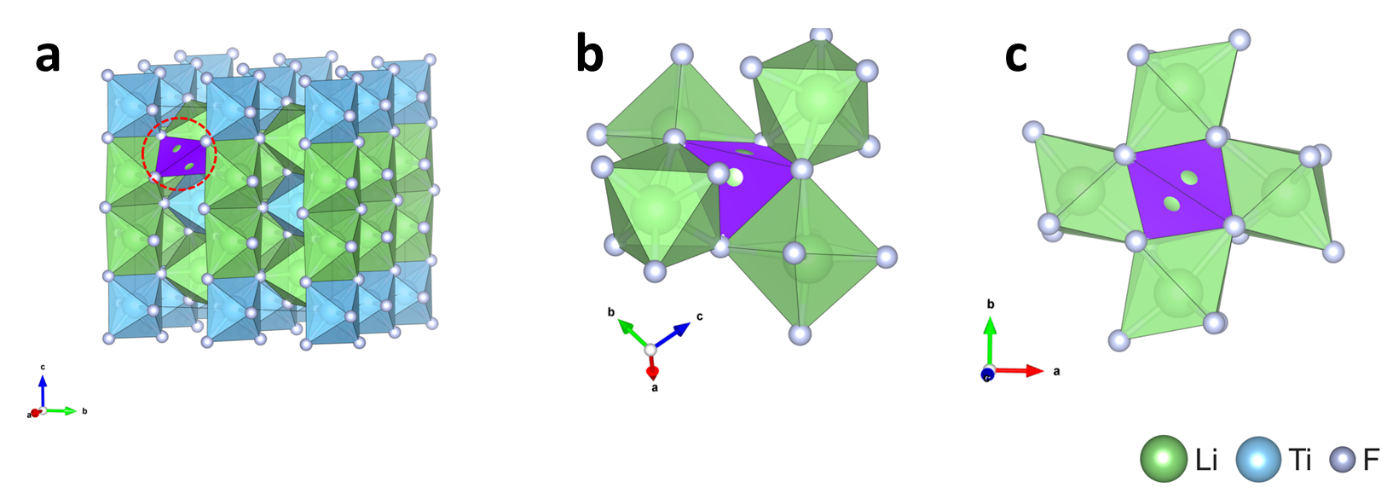


**Supplementary Fig. 17** **a−c**, Crystal structure of Li2.125TiF6 (**a**) and additional Li tetrahedral site (purple) enclosed with octahedral Li sites (green) within Li2.125TiF6 (**b**, **c**).


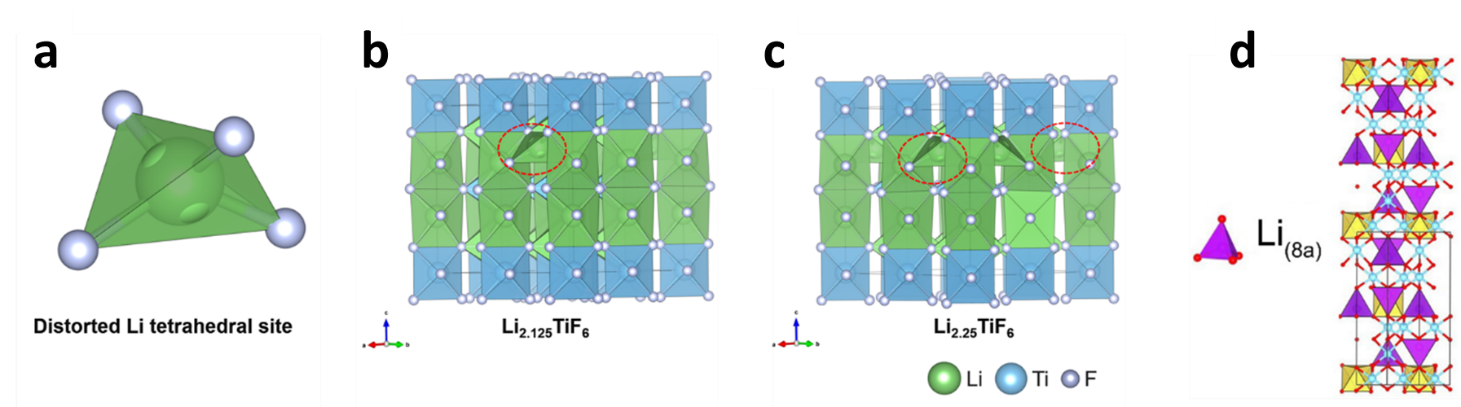


**Supplementary Fig. 18** **a**, Additional Li tetrahedral site (green, quadratic elongation = 1.0519 and bond angle variance = 177.5143°) within Li-excess Li2TiF6 (Li2+aTiF6). **b**,**c**, Crystal structures with Li tetrahedral sites (quadratic elongation = 1 and bond angle variance = 0°) for Li2.125TiF6 (**b**) and Li2.25TiF6 (**c**).


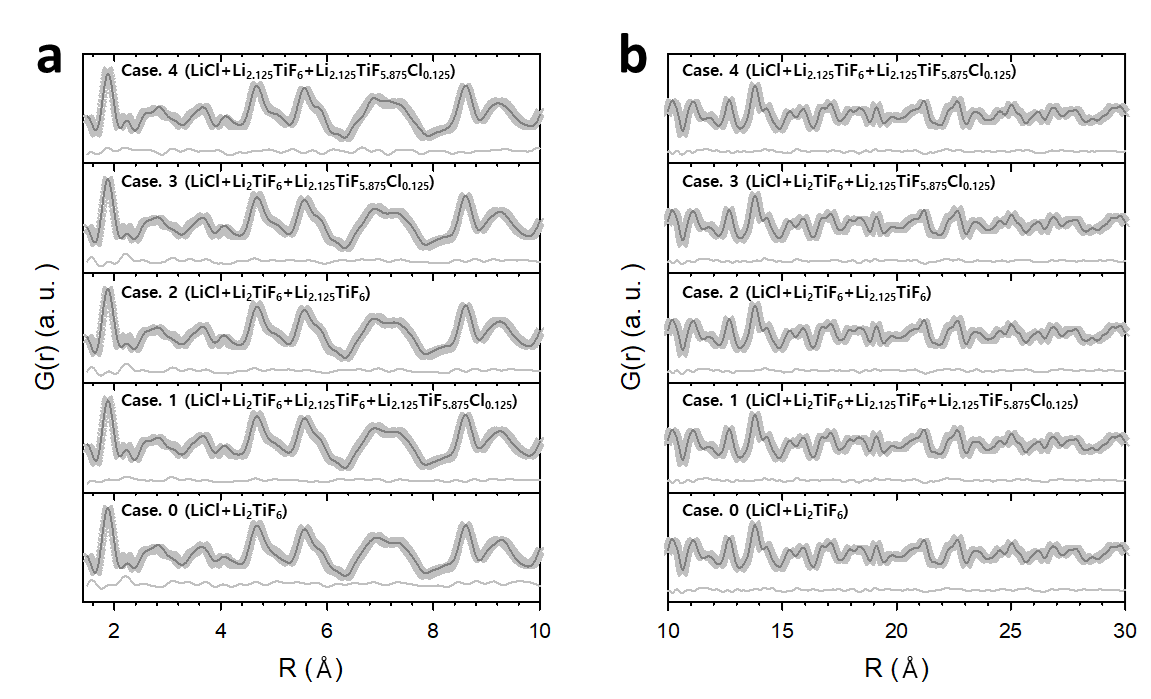


**Supplementary Fig. 19 a,b,** Observed and calculated PDF G(r) with best fit for LiCl−4Li2TiF6 in the range of 1.5−10 Å (**a**) and 10−30 Å (**b**) with different components. The detailed results are summarized in Supplementary Table 30.


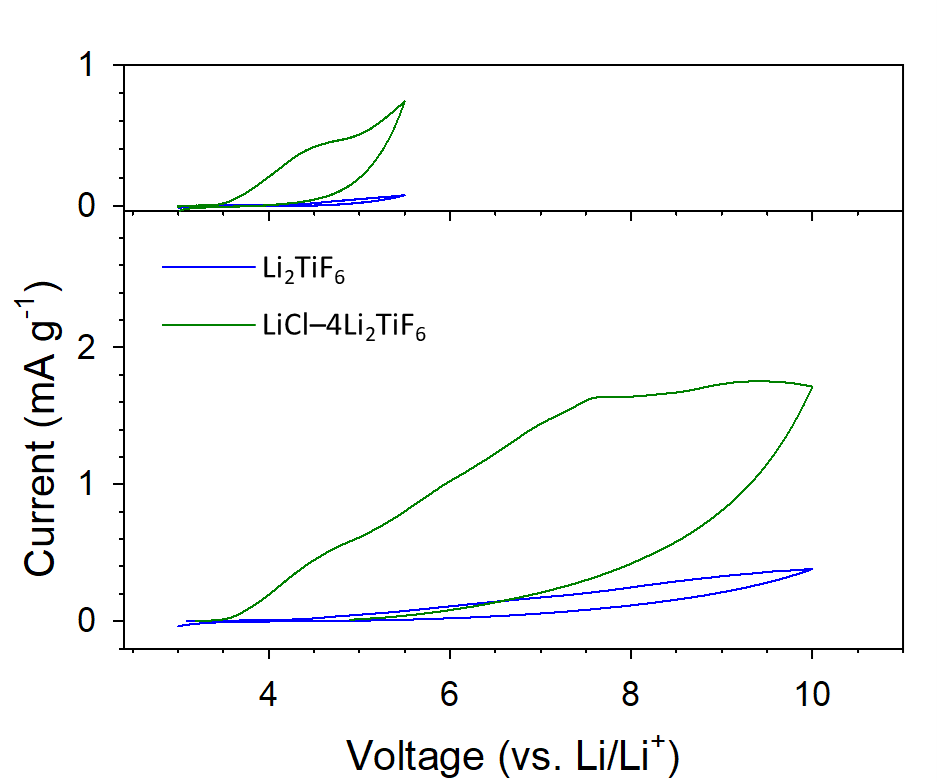


**Supplementary Fig. 20** Cyclic voltammograms of (SE–C)|SE|LPSCl|(Li–In) cells for Li2TiF6 (blue) and LiCl–Li2TiF6 (dark green) up to 10 V (vs. Li/Li+) at 0.1 mV s-1 and 30 °C.

**
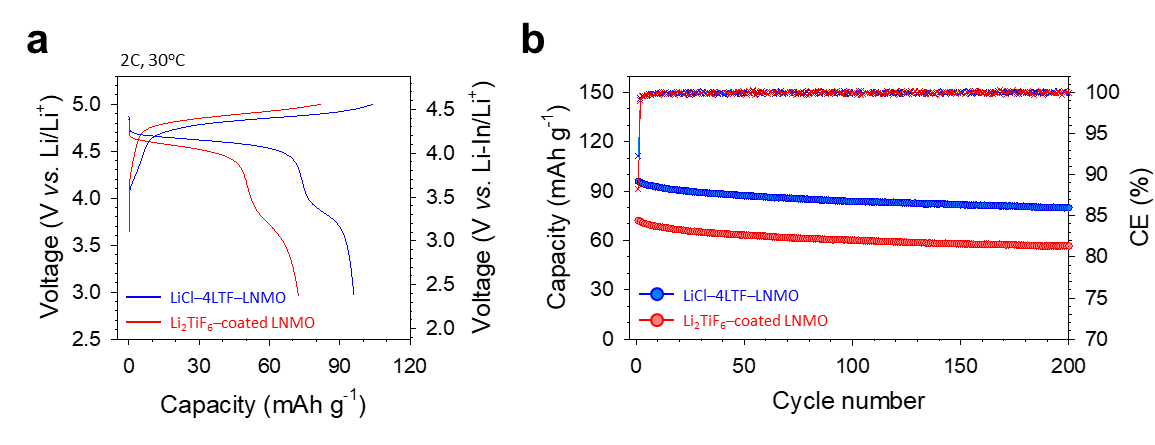
**

**Supplementary Fig. 21. LNMO|LPSCl|(Li–In) ASSB cells employing Li2TiF6 as a shielding material at 30 ºC a,b,** Initial charge–discharge voltage profiles at 2C (**a**) and corresponding rate capability (**b**). The results for LiCl−4LTF–LNMO is plotted for comparison.


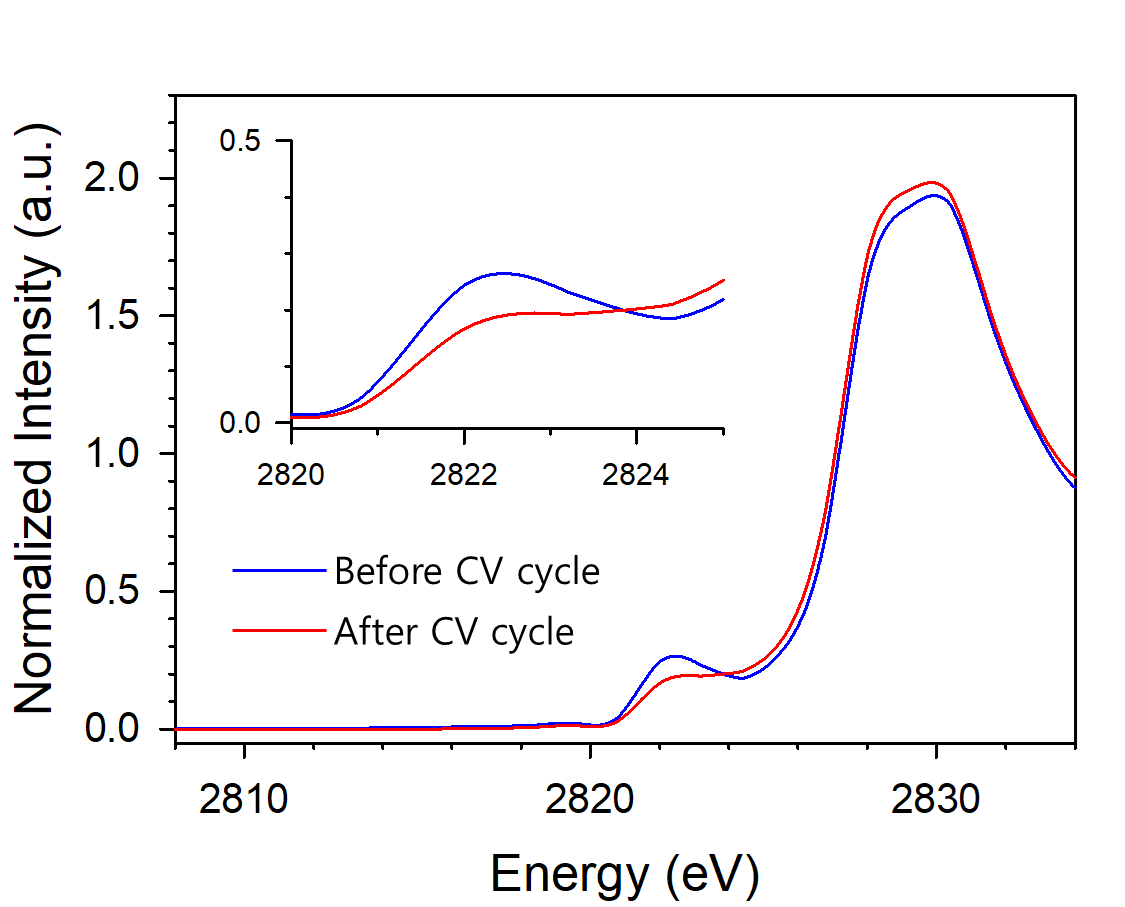


**Supplementary Fig. 22** Cl K-edge XAS spectra of LiCl−4Li2TiF6 before and after three CV cycles between 3 and 5 V (vs. Li/Li+) in (carbon/(LiCl−4LTF))||(Li−In) cells at 0.1 V s-1 and 30 ºC. The weight ratio of carbon and LiCl−4LTF was 2:8.

**Supplementary Note 4.** The results show that despite a slight reduction in intensity, the pre-edge between 2820 and 2826 eV, associated with Ti-Cl interactions, remains consistent. This finding suggests that while some Cl is released as Cl2 gas through decomposition, as predicted by DFT calculation (Supplementary Table 26), the majority remains bonded as Ti-Cl within the lattice.


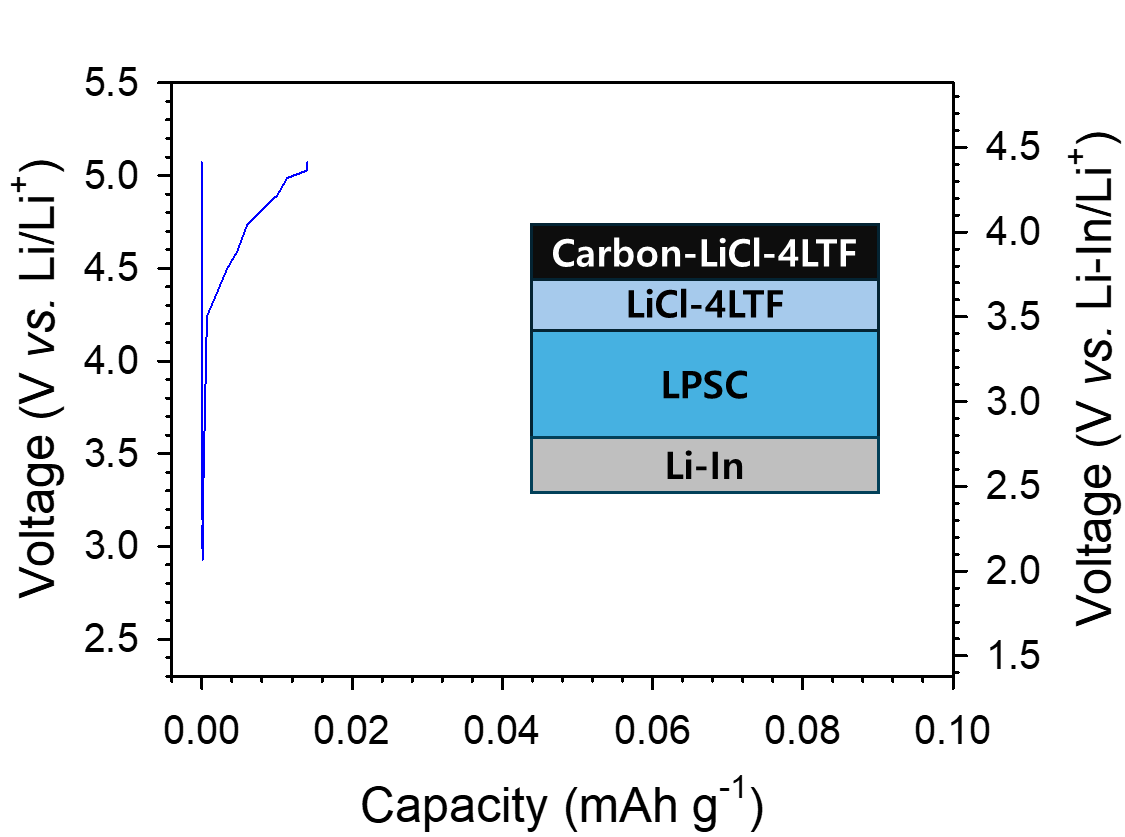


**Supplementary Fig. 23** Initial charge-discharge voltage profiles of (carbon/(LiCl−4LTF))||(Li−In) cells at 0.1C (CC-CV with a limiting C-rate of 0.01C, 1C = 120 mA g-1) and 30 ºC. The weight ratio of carbon and LiCl−4LTF was 2:8.

**Supplementary Note 5.** The charge capacity of the LiCl−4LTF electrode was significantly lower than the theoretical value calculated under the assumption that all Cl in LiCl−4LTF would be released. If all Cl in LiCl−4LTF evolved to Cl2 gas, the theoretical charge capacity would be 88 mAh (g of LiCl−4LTF)-1. However, the experimentally observed charge capacity was far lower, at <0.02 mAh g-1. This result indicates that Li2TiF6, formed by the decomposition of Li2TiF5.875Cl0.125, acts as a passivation layer that prevents further decomposition.


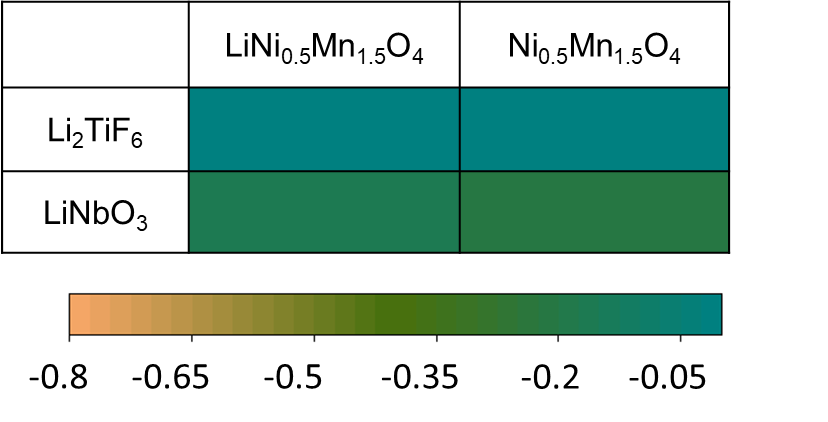


**Supplementary Fig. 24** Reaction energies of shielding layers with LiNi0.5Mn1.5O4 at lithiated and delithiated states in eV/atom.


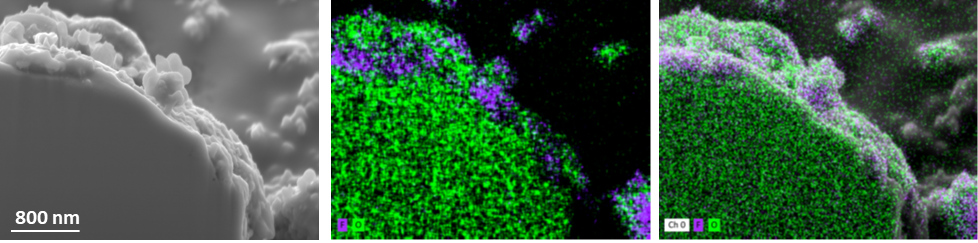


**Supplementary Fig. 25** SEM image of LiCl–4LTF-coated LCMO, the corresponding EDXS elemental maps of O and F (middle), and their overlapping image with the SEM image (right).

**
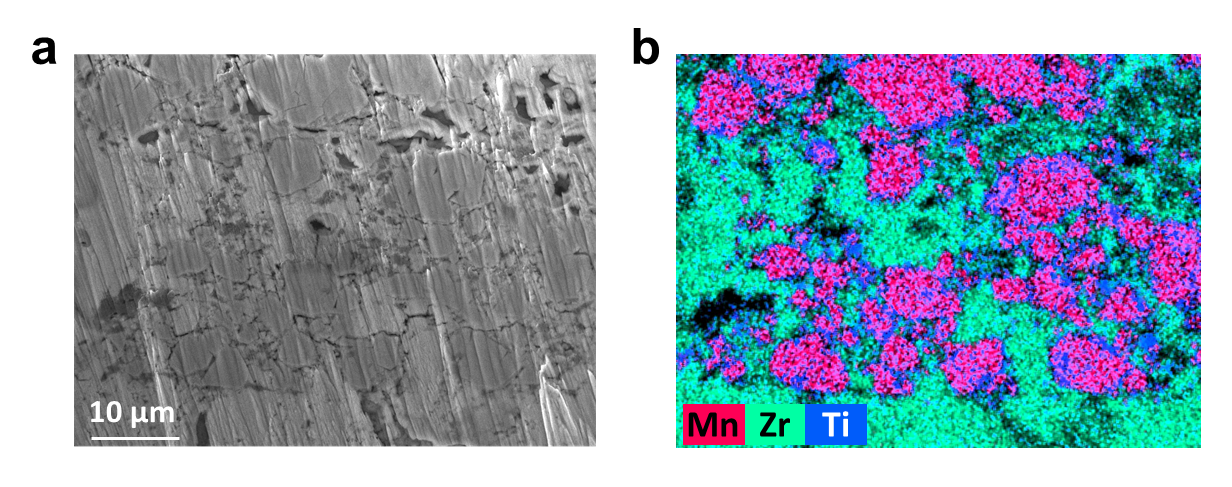
**

**Supplementary Fig. 26 Cross-sectional SEM results. a, b,** Cross-sectional SEM image of LiCl−4LTF electrodes employing ZrO2−LZCF (**a**) and corresponding EDXS elemental maps of Mn, Zr, and Ti (**b**).


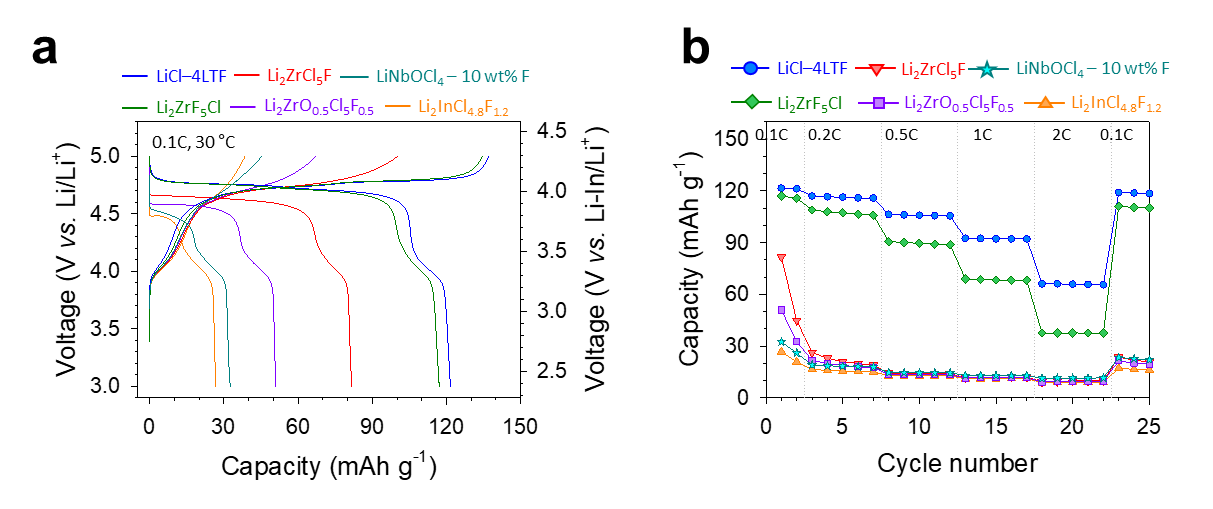


**Supplementary Fig. 27 LNMO|LPSCl|(Li–In) ASSB cells employing Li2ZrF5Cl, Li2ZrCl5F, Li2.5ZrCl5F0.5O0.5, LiNbOCl4–10wt%F, or Li3InCl4.8F1.2 as shielding materials at 30 ºC a,b**, Initial charge–discharge voltage profiles at 0.1C (**a**) and corresponding rate capability (**b**). Corresponding XRD and Nyquist plots of Li2ZrF5Cl, Li2ZrCl5F, Li2.5ZrCl5F0.5O0.5, LiNbOCl4–10 wt%F, or Li3InCl4.8F1.2 are shown on Supplementary Figs. 28 and 29.


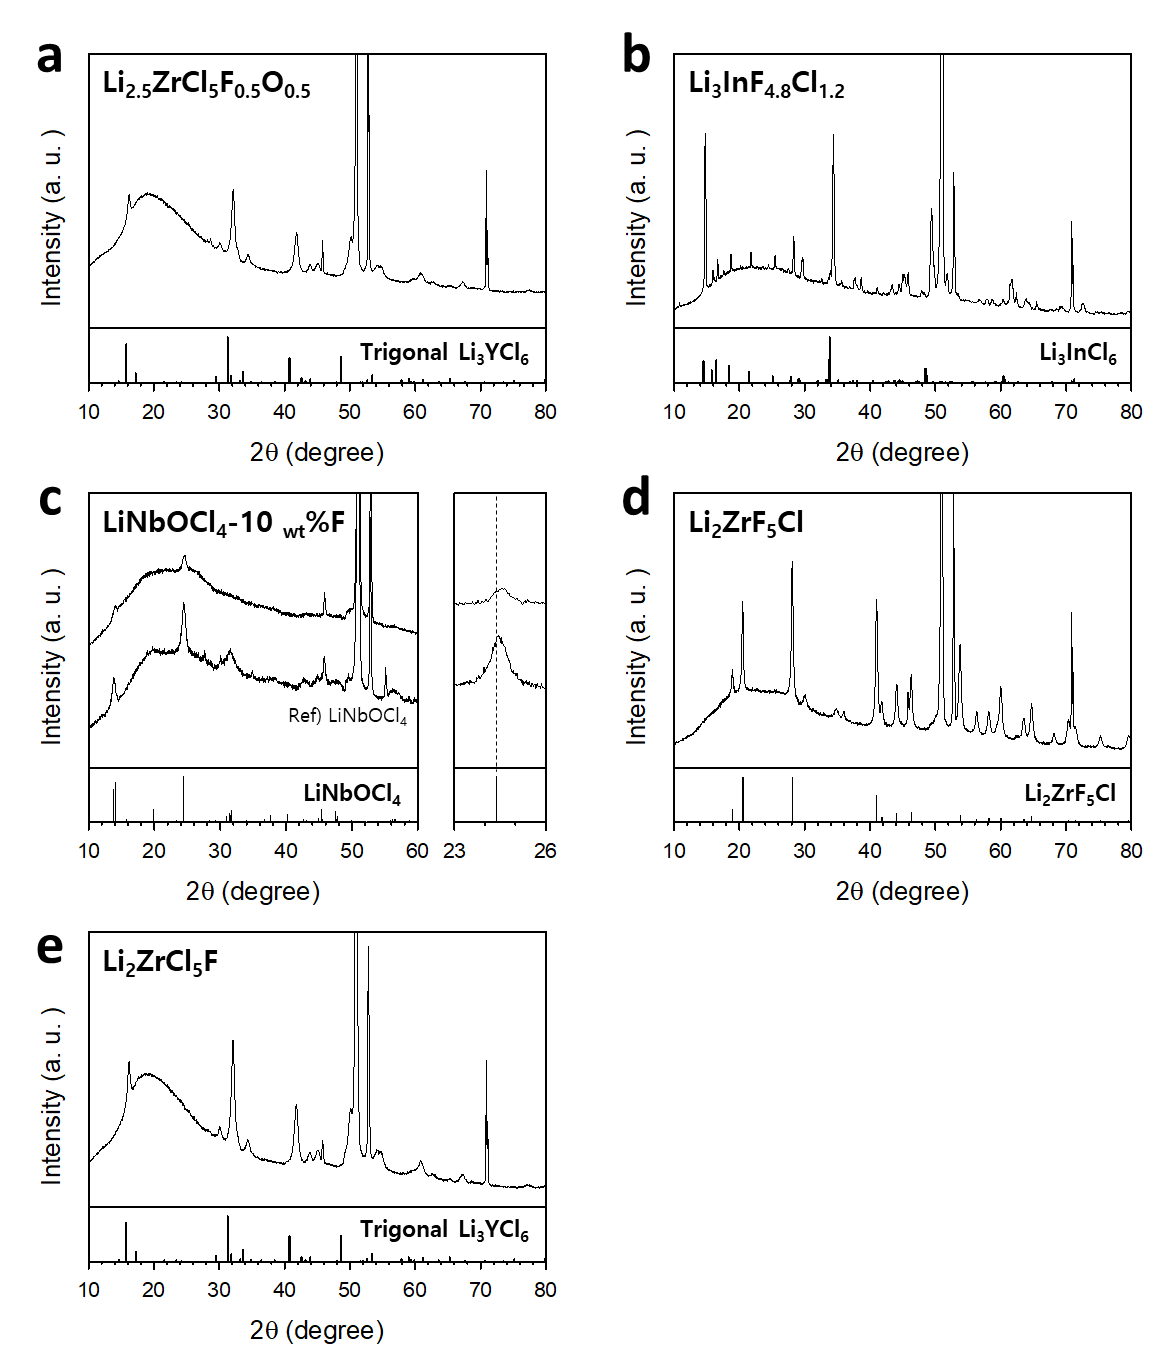


**Supplementary Fig. 28** **a−e**, XRD patterns of Li2.5ZrCl5F0.5O0.5 (**a**), and Li3InCl4.8F1.2 (**b**), LiNbOCl4-10 wt%F (**c**), Li2ZrF5Cl (**d**), and Li2ZrCl5F (**e**). Corresponding electrochemical performance and Li+ conductivity results are presented in Supplementary Figs. 27 and 29, respectively.


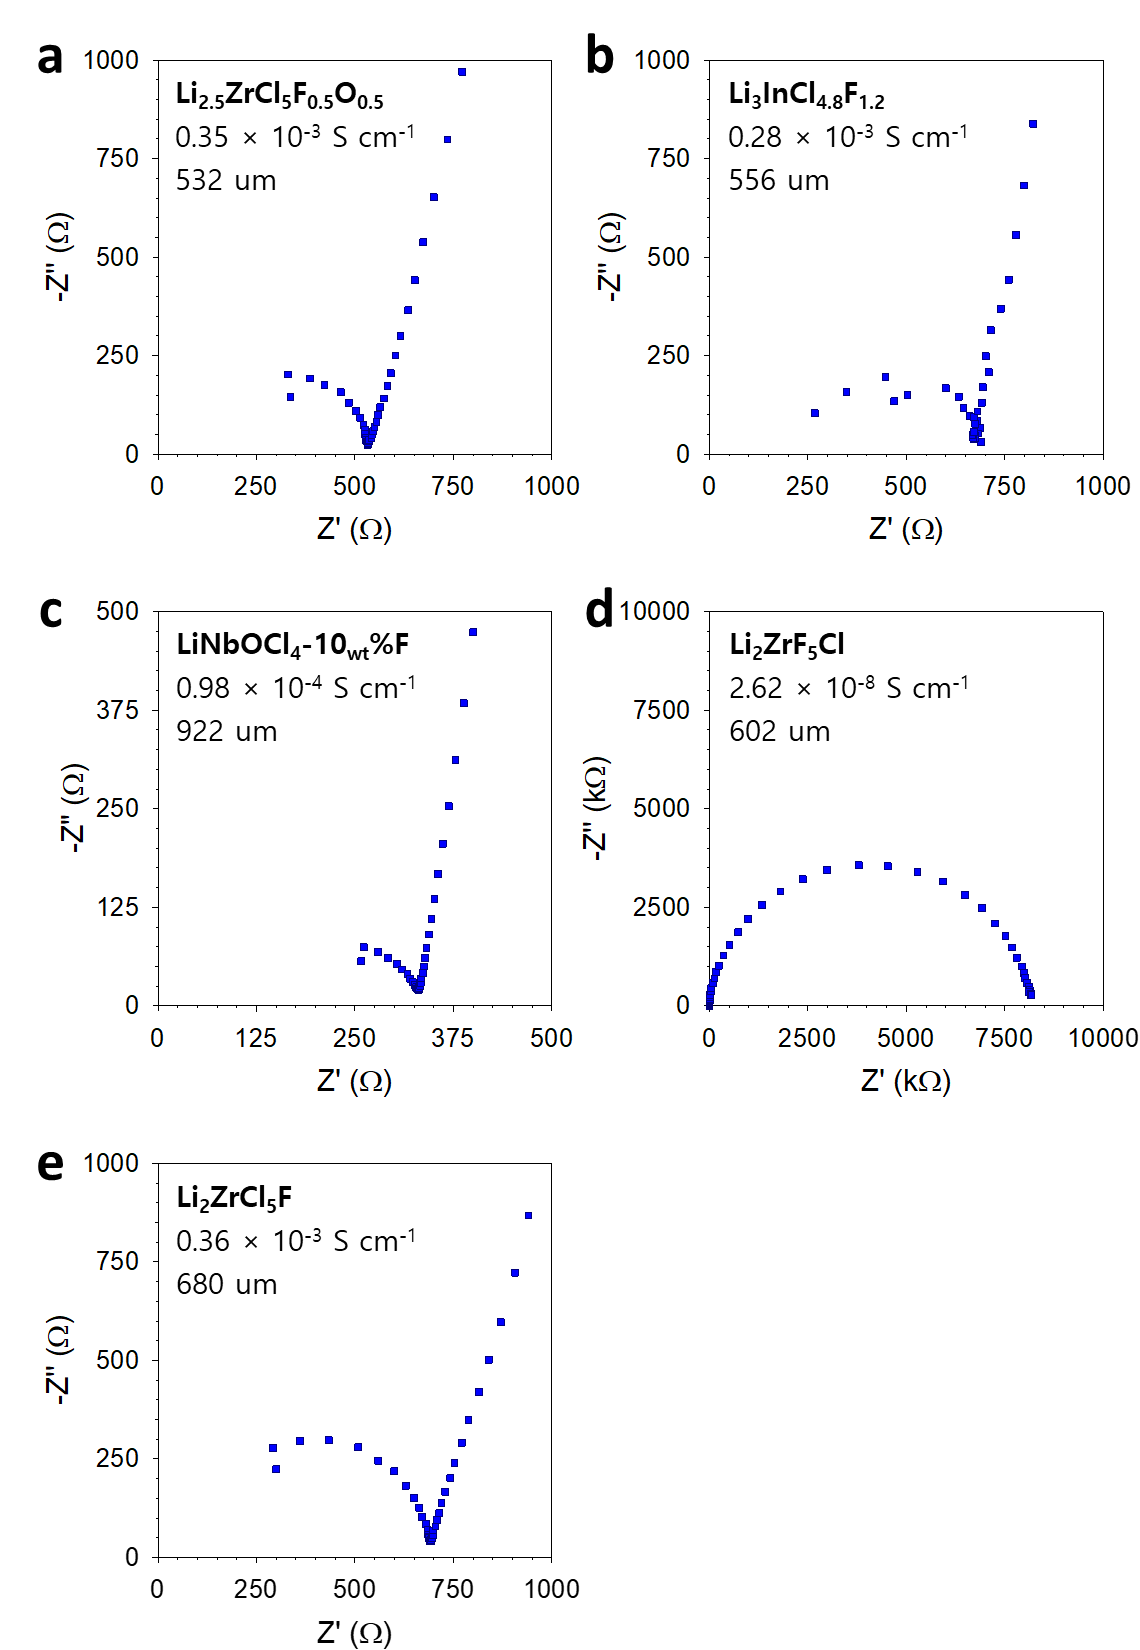


**Supplementary Fig. 29** **a−e**, Nyquist plots of Ti|SE|Ti symmetric cells at 30 ºC for Li2.5ZrCl5F0.5O0.5 (**a**), Li3InCl4.8F1.2 (**b**), LiNbOCl4-10 wt%F (**c**), Li2ZrF5Cl (**d**), and Li2ZrCl5F (**e**). Corresponding electrochemical performance and XRD results are presented in Supplementary Figs. 27 and 28, respectively.


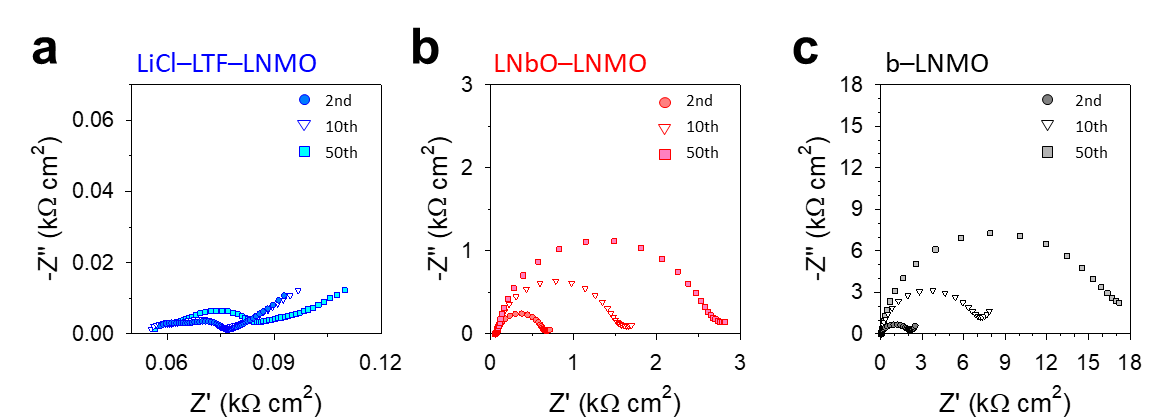


**Supplementary Fig. 30 a–c, Nyquist plots at different cycles for LiCl–4LTF–LNMO** (**a**), LNbO–LNMO (**b**), and b–LNMO electrodes (**c**) in LNMO|(ZrO2–LZCF)|LPSCl|(Li–In) cells cycled at 1C and 30 °C. The detailed results are summarized in Supplementary Table 33.

**
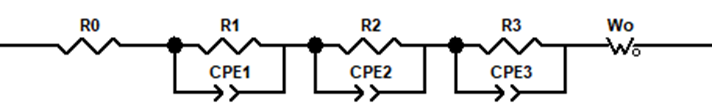
**

**Supplementary Fig. 31** Equivalent-circuit model for fitting the EIS data in Supplementary Fig. 30 and Supplementary Table 33.


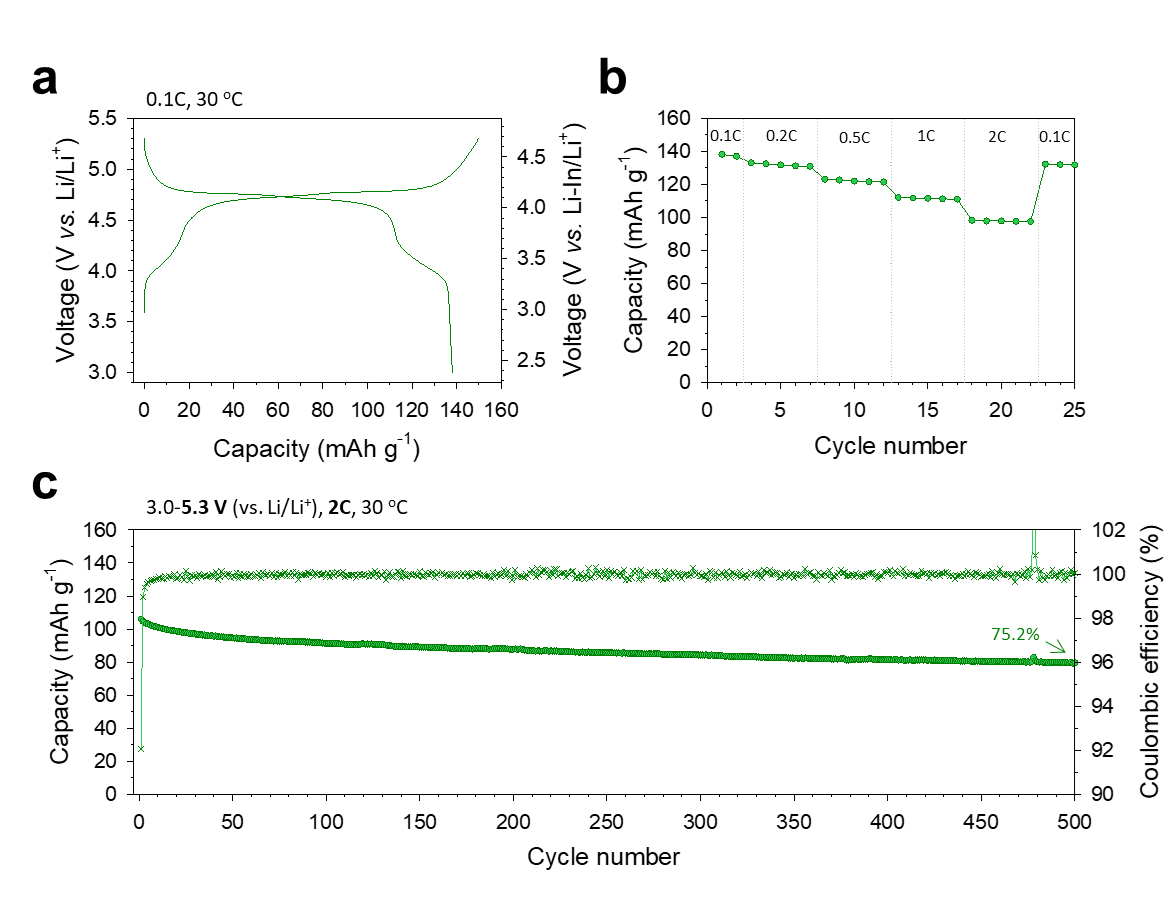


**Supplementary Fig. 32 LiCl**–4**LTF**–**LNMO cycled up to 5.3 V (vs. Li/Li+) at 30 °C. a–c**, First-cycle charge–discharge voltage profiles of LNMO|(ZrO2–LZCF)|LPSCl|(Li–In) half cells between 3.0 and 5.3 V (vs. Li/Li+) at 0.1C (**a**), and their corresponding rate capability (**b**), and cycling performances at 2C (**c**).


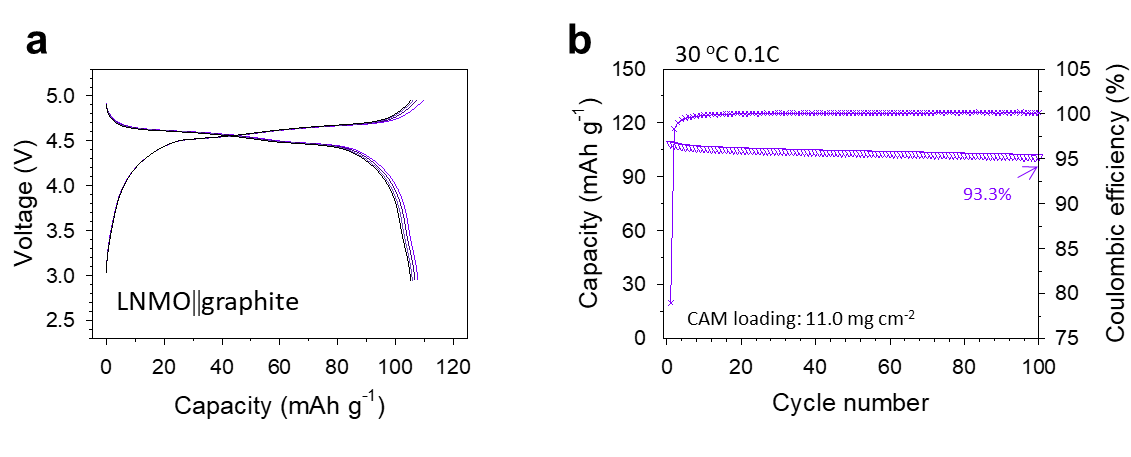


**Supplementary Fig. 33 (LiCl**–4**LTF**–**LNMO)||graphite full cells at 30 °C. a, b** Charge–discharge voltage profiles at 0.1C for LNMO|(ZrO2–LZCF)|LPSCl|graphite full cells between 3.0 and 5.0 V (**a**) and their corresponding cycling performance (**b**).


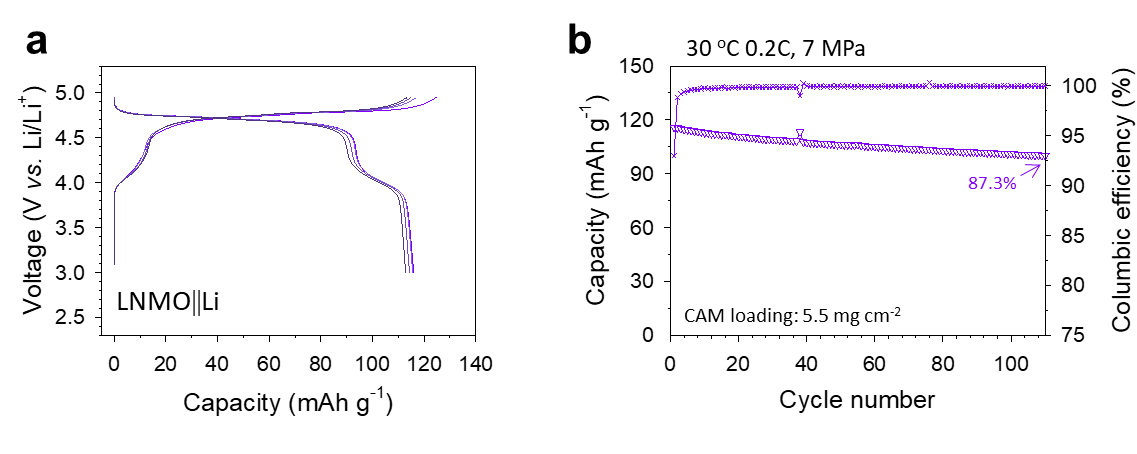


**Supplementary Fig. 34 (LiCl**–4**LTF**–**LNMO)||Li full cells at 30 °C and 7 MPa. a,b,** Charge–discharge voltage profiles at 0.2C of LNMO|(ZrO2–LZCF)|LPSCl|Li full cells between 3.0 and 5.0 V (**a**) and their corresponding cycling performance (**b**).

**
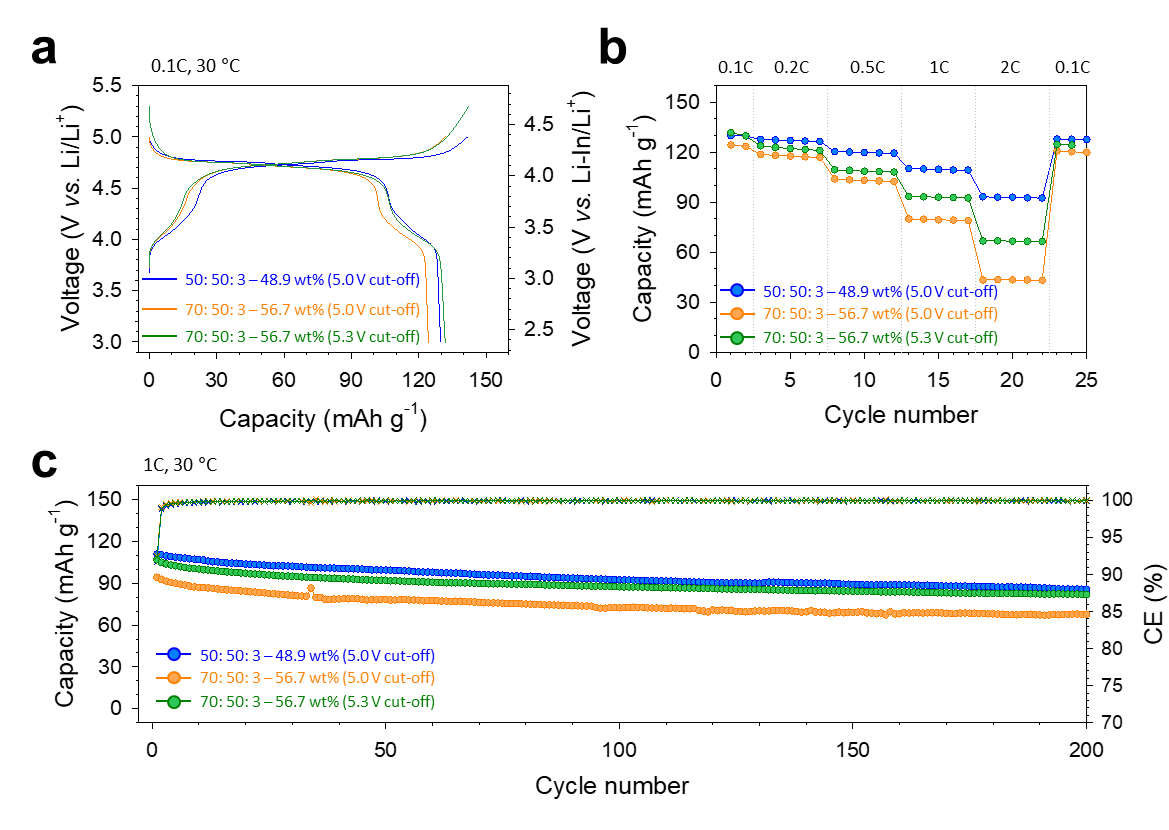
**

**Supplementary Fig. 35 LiCl****−4LTF−LNMO electrodes with different CAM ratios at 30 °C. a–c**, Initial charge–discharge voltage profiles for LNMO||(Li–In) ASSB cells at 0.1C (1C = 120 mA g-1) (**a**), corresponding rate capability (**b**) and cycling performance with Coulombic efficiency at 1C (**c**).

**Supplementary Note 6**. Based on the calculated volume ratios for different CAM/SE weight ratios in Supplementary Table 34, we conducted an electrochemical evaluation with a 5 V (vs. Li/Li+) cutoff using a composite electrode with a 70:50:3 weight ratio, corresponding to 56.7 wt% CAM, where the SE occupies 1.16 times the volume of the CAM (shown by the orange line). Due to reduced ionic conductivity within the composite electrode, performance decreased at high C-rate (e.g., 1C and 2C) compared to the 50:50:3 (48.9 wt% CAM) composite electrode. However, by raising the cutoff voltage up to 5.3 V (vs. Li/Li+), the reduced capacity could be compensated, underscoring the benefit of the exceptional stability of the shielding material LiCl−4LTF.


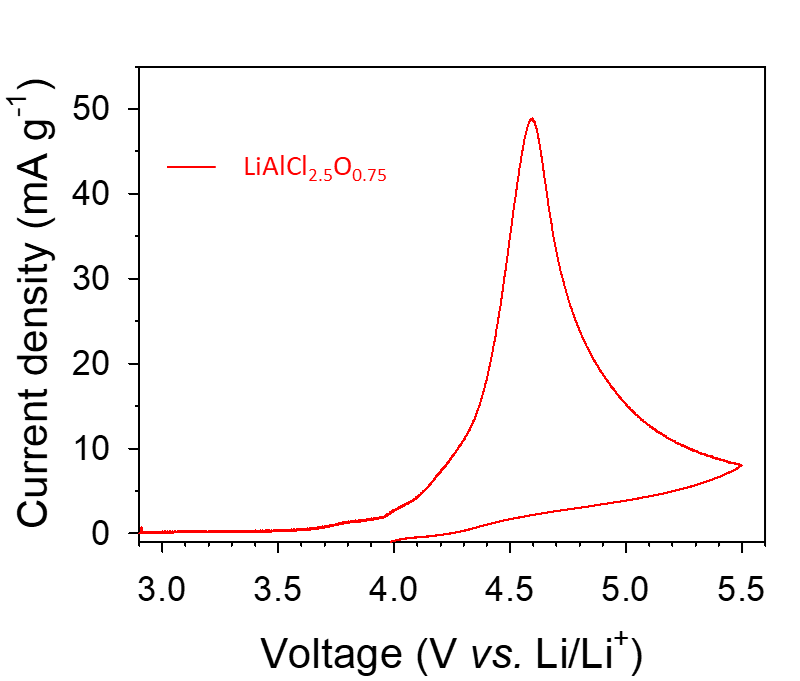


**Supplementary Fig. 36 Electrochemical stability of LiAlCl2.5O0.75.** CV curves of LiAlCl2.5O0.75 at 0.1 mV s-1 and 30 °C.


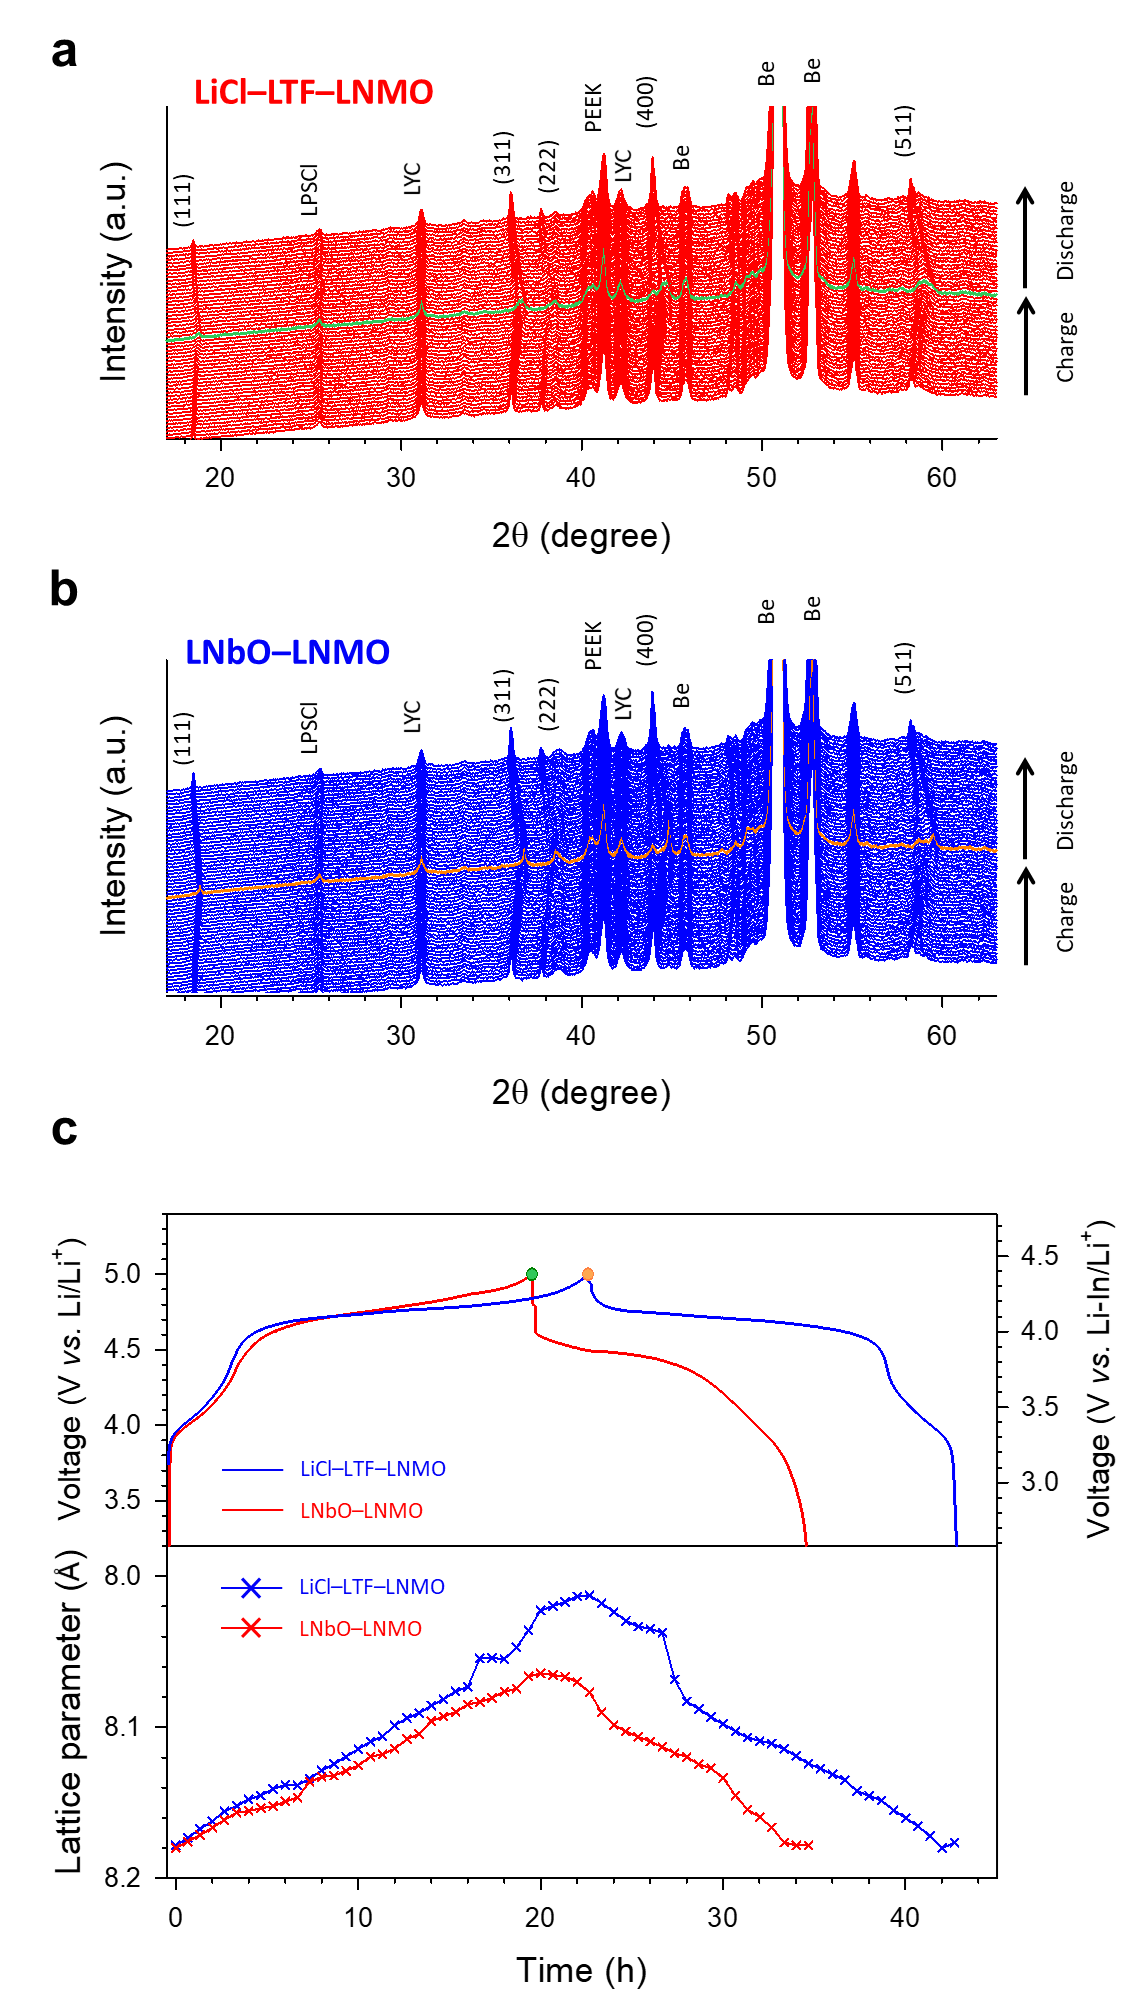


**Supplementary Fig. 37 In situ XRD results of LNbO**–**LNMO and LiCl**–4**LTF**–**LNMO at room temperature. a,b,** Full-range in situ XRD patterns for LNbO–LNMO (**a**) and LiCl–4LTF–LNMO electrodes (**b**). **c**, First-cycle charge–discharge voltage profiles and corresponding lattice parameters (*a* = *b* = *c*).

**Supplementary Note 7.** The lattice parameters of LNMO were obtained using Le Bail fitting with a cubic *Fdm* model. The changes in the (511) peaks are magnified in Fig. 3b, c to highlight the significant differences in lattice changes during charging and discharging. The LNbO–LNMO electrode, which exhibited less lattice change, has a lower SOC than the LiCl–4LTF–LNMO electrode. Specifically, the larger capacity of LiCl–4LTF–LNMO over LNbO–LNMO clearly resulted from a higher SOC.
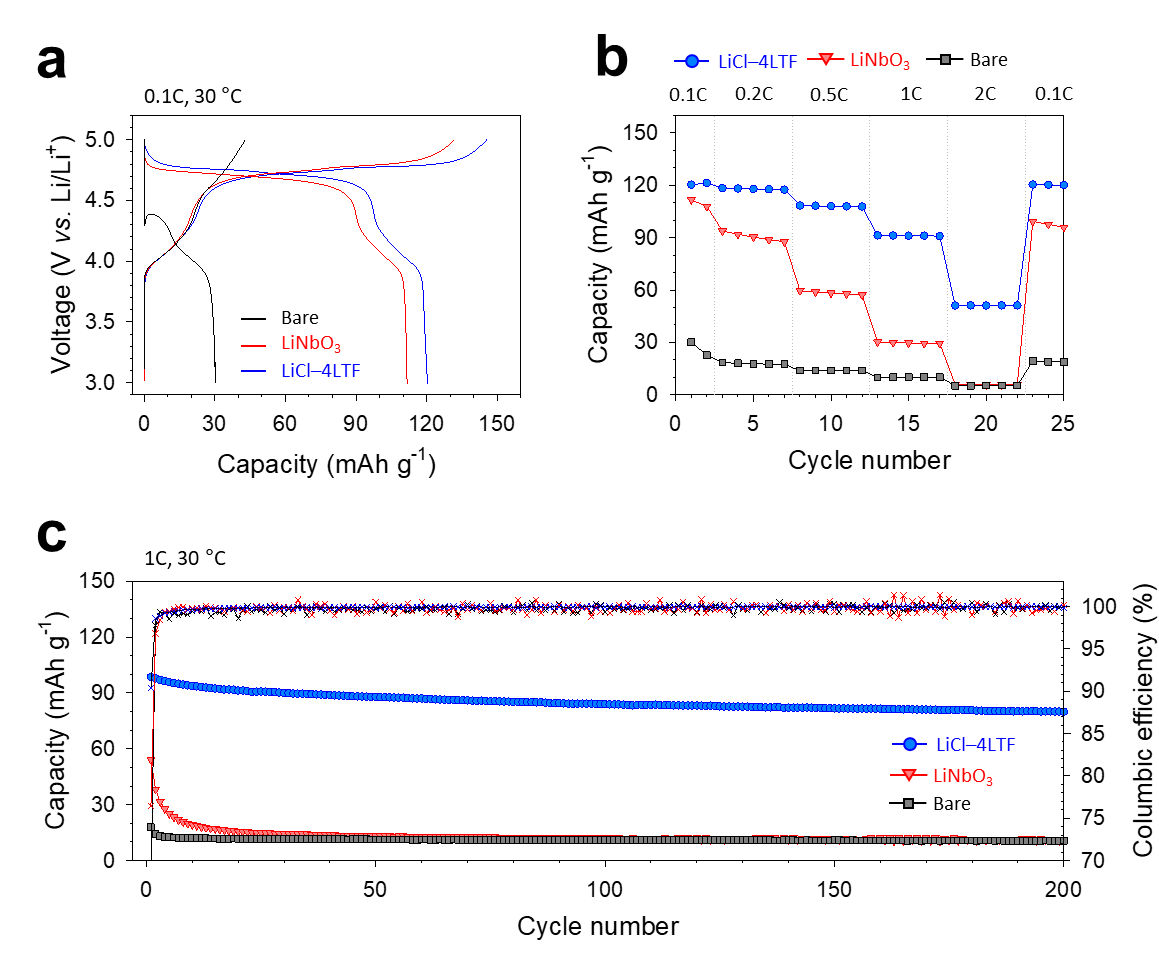


**Supplementary Fig. 38 LiCl****−4LTF−LNMO electrodes utilizing LYC catholyte in ASSB cells at 30 °C.** **a−c**, Initial charge–discharge voltage profiles for LNMO||(Li–In) ASSB cells at 0.1C (1C = 120 mA g-1) (**a**), corresponding rate capability (**b**), and cycling performance at 1C (**c**).


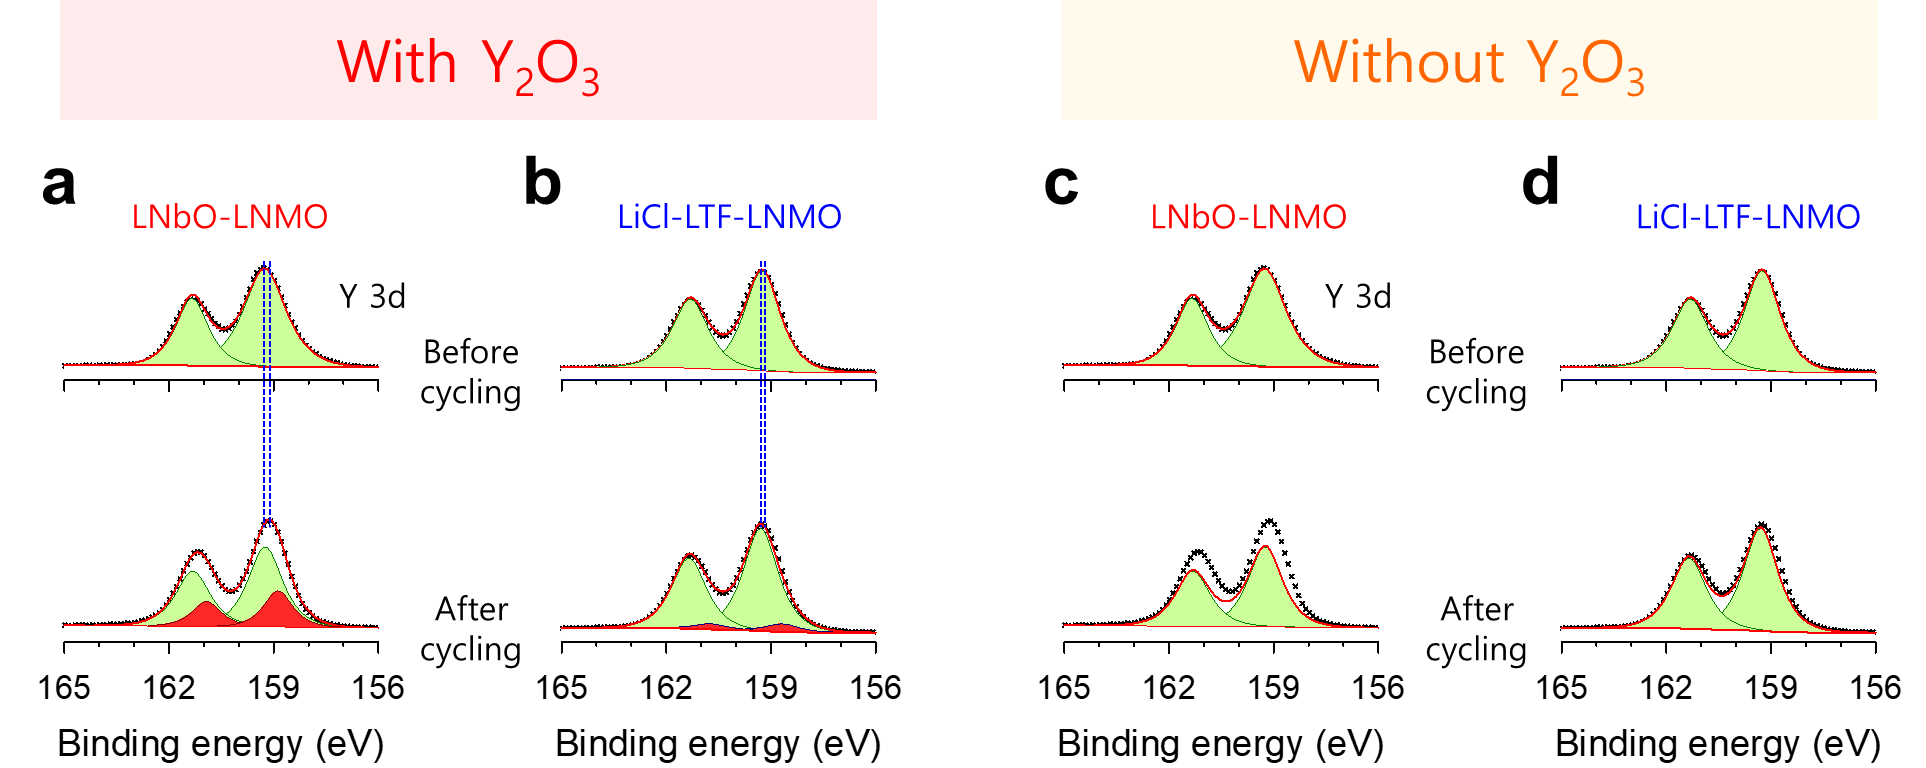


**Supplementary Fig. 39 Ex situ Y 3d XPS results of LNMO electrode, fitted without or with Y2O3. a−d,** Y 3d spectra for LNbO**−**LNMO and LiCl−4LTF-coated LNMO electrodes before and after cycling, fitted with Y2O3 (**a, b**) and without Y2O3 (**c**, **d**).

**Supplementary Note 8.** The XPS fitting results with and without Y2O3 are presented. These results show significant deviations between the measured data and the fitted lines for the LNbO**−**LNMO electrode, justifying the necessity of Y2O3. In contrast, the LiCl**−**4LTF**−**LNMO electrode shows minimal deviations, indicating a negligible presence of Y2O3.


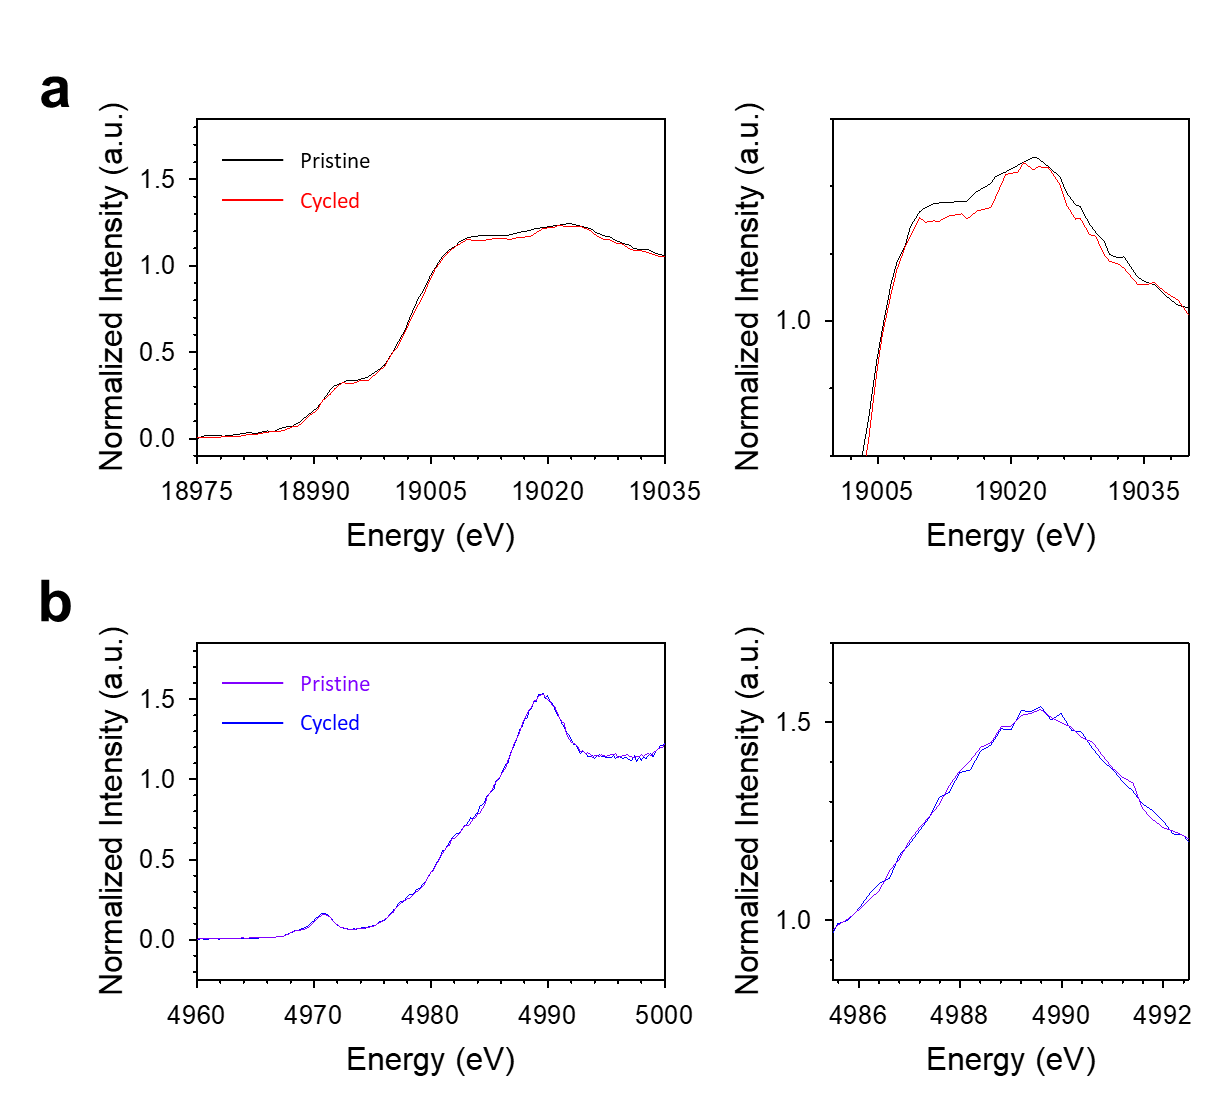


**Supplementary Fig. 40 Stability of LiCl–4LTF and LiNbO during cycling. a,b,** Nb K-edge XANES spectra of LNbO–LNMO electrodes (**a**) and Ti K-edge XANES spectra of LiCl–4LTF–LNMO electrodes (**b**) in LNMO|LYC|LPSCl|(Li–In) half cells before cycling and after 50 cycles between 3.0 and 5.0 V (V vs. Li/Li+) at 1C and 30 °C.


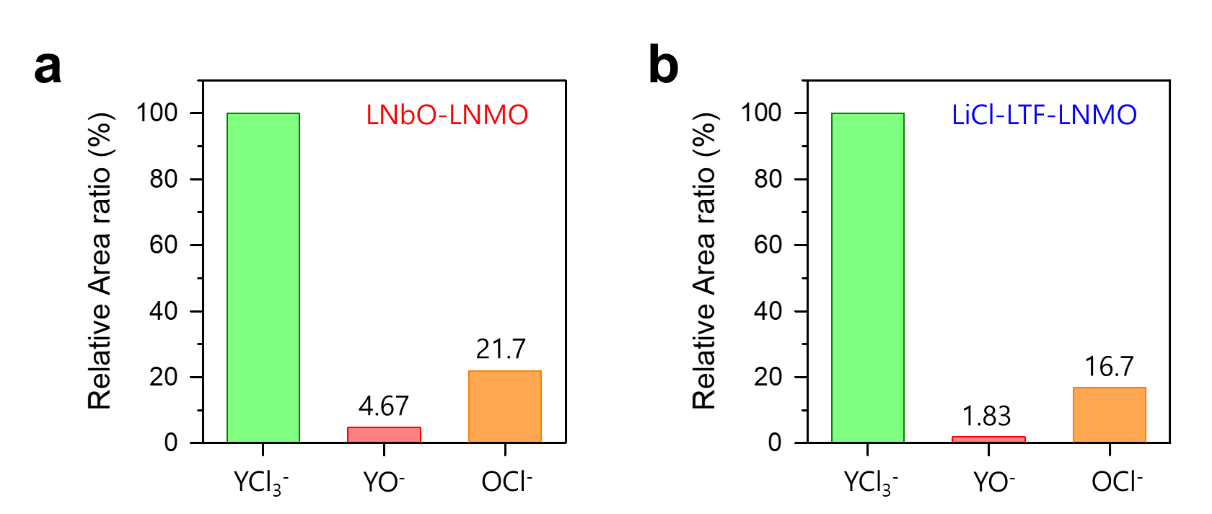


**Supplementary Fig. 41** **a**,**b,** Relative area ratio for LYC-derived oxidized species of YO- and OCl- for LNbO−LNMO (**a**) and LiCl−4LTF−LNMO electrodes (**b**) after 50 cycles at 30 °C. The signals were normalized relative to the YCl3- signal area.

**Supplementary Note 9.** After cycling, both the LNbO−LNMO and LiCl−4LTF−LNMO electrodes exhibited signals for oxidized YO- and OCl- species, as well as YCl3-. The YO- and OCl- signal areas of each electrode were normalized to the YCl₃- signal area. Notably, the YO- signal was significantly higher in the LNbO−LNMO electrode compared to the LiCl−4LTF−LNMO electrode after cycling (4.67% vs. 1.83%), indicating a greater generation of oxidized species in the LNbO−LNMO electrode. The OCl- peak was also higher in the LNbO−LNMO electrode, at 21.7%, compared to 16.7% in the LiCl−4LTF−LNMO electrode. The YO- and OCl- signals in the LiCl−4LTF-LNMO electrode likely originate from unprotected interfaces.

**
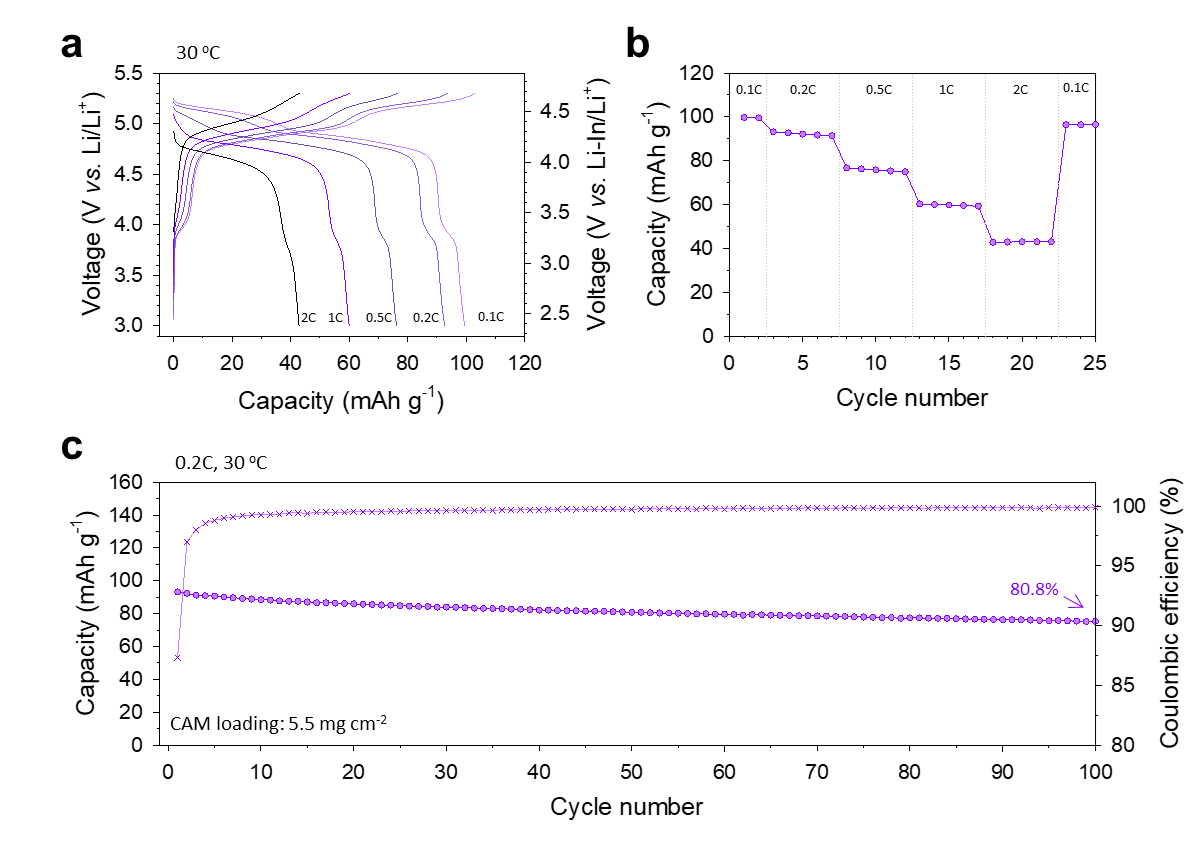
**

**Supplementary Fig. 42 LiCl**–4**LTF**–**LCMO at 30 °C. a−c,** Charge–discharge voltage profiles at different C-rates of LCMO|(ZrO2–LZCF)|LPSCl|(Li–In) half cells between 3.0 and 5.3 V (vs. Li/Li+) (**a**), their corresponding rate capability (**b**), and cycling performance at 0.2C (**c**).

**
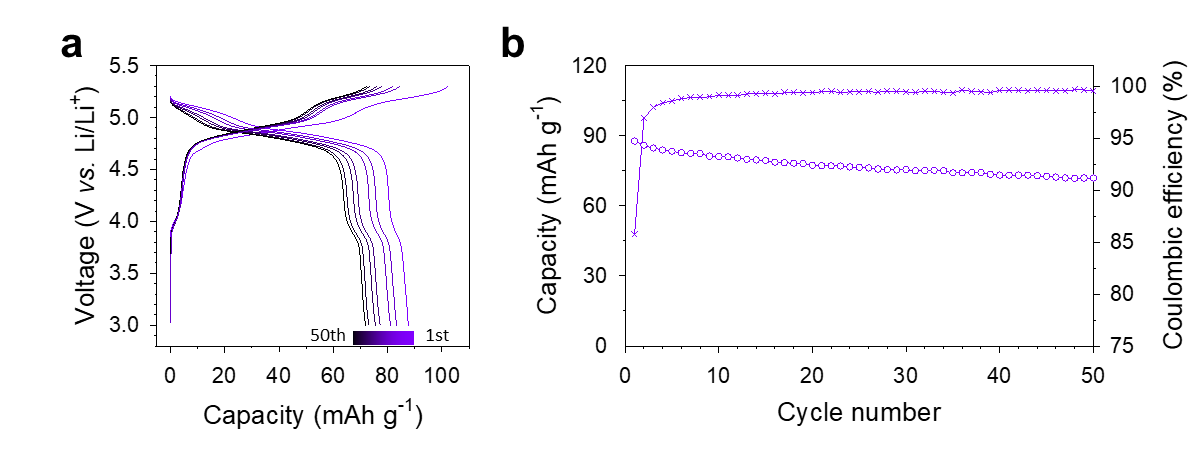
**

**Supplementary Fig. 43 (LiCl**–4**LTF**–**LCMO)||Li full cells at 30 °C and 7 MPa.** **a,b,** Charge–discharge voltage profiles at 0.2C between 3.0 and 5.3 V (**a**) and their corresponding cycling performance (**b**).

**
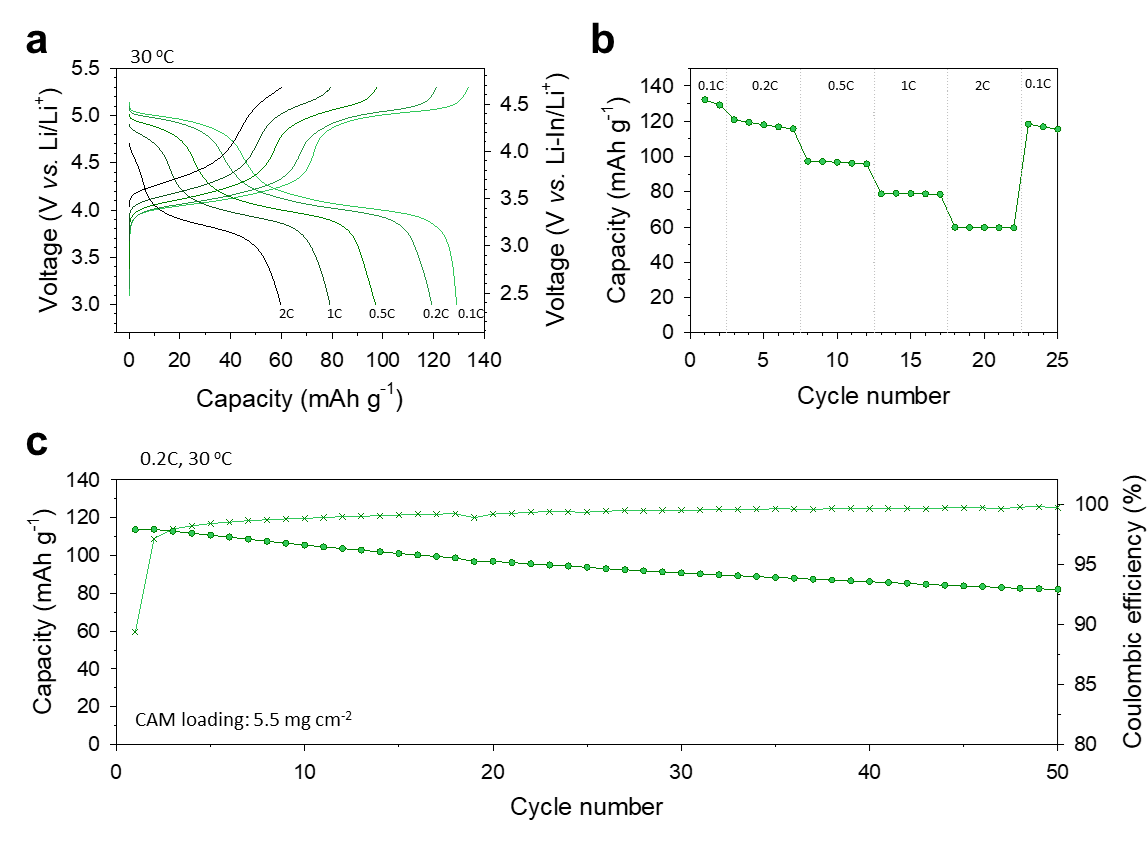
**

**Supplementary Fig. 44 LiCl**–4**LTF**–**LFMO at 30 °C. a−c,** Charge–discharge voltage profiles at different C-rates of LFMO|(ZrO2–LZCF)|LPSCl|(Li–In) half cells between 3.0 and 5.3 V (vs. Li/Li+) (**a**), their corresponding rate capability (**b**), and cycling performance at 0.2C (**c**).

**
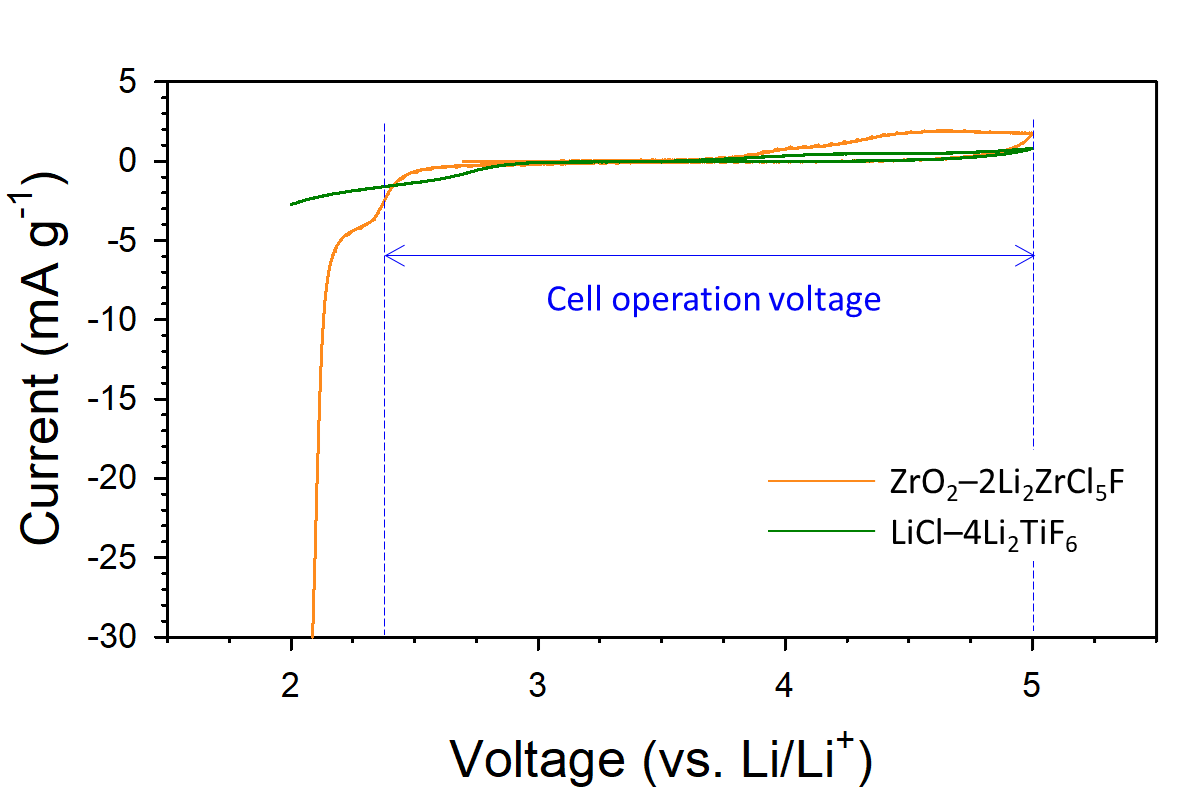
**

**Supplementary Fig. 45 Electrochemically stable window of LiCl**–**4Li2TiF6 and ZrO2**–**2Li2ZrCl5F.** Cyclic voltammogram of (SE+C)|SE|LPSCl|(Li–In) cells at 0.1 mV s-1 and 60 °C between 2.0 and 5.0 V (vs. Li/Li+) for ZrO2–LZCF and LiCl–4LTF. The initial scan began in the positive direction.

**Supplementary Note 10.** Neither LiCl−4Li2TiF6 nor ZrO2−LZCF showed a significant reduction in 2.3–5.0 V (vs. Li/Li+), where the LNMO cells operate, as shown in Fig. 5c. Thus, this result indicated the marginal effects from the interfacial resistance under these operating conditions.


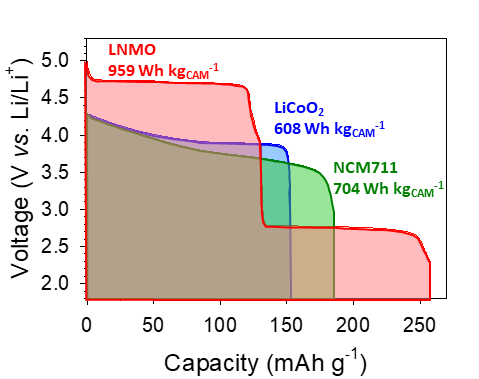


**Supplementary Fig. 46** Discharge voltage profiles and corresponding energy densities of different CAMs of LNMO, LiCoO2, and LiNi0.7Co0.15Mn0.15O2 (NCM711).


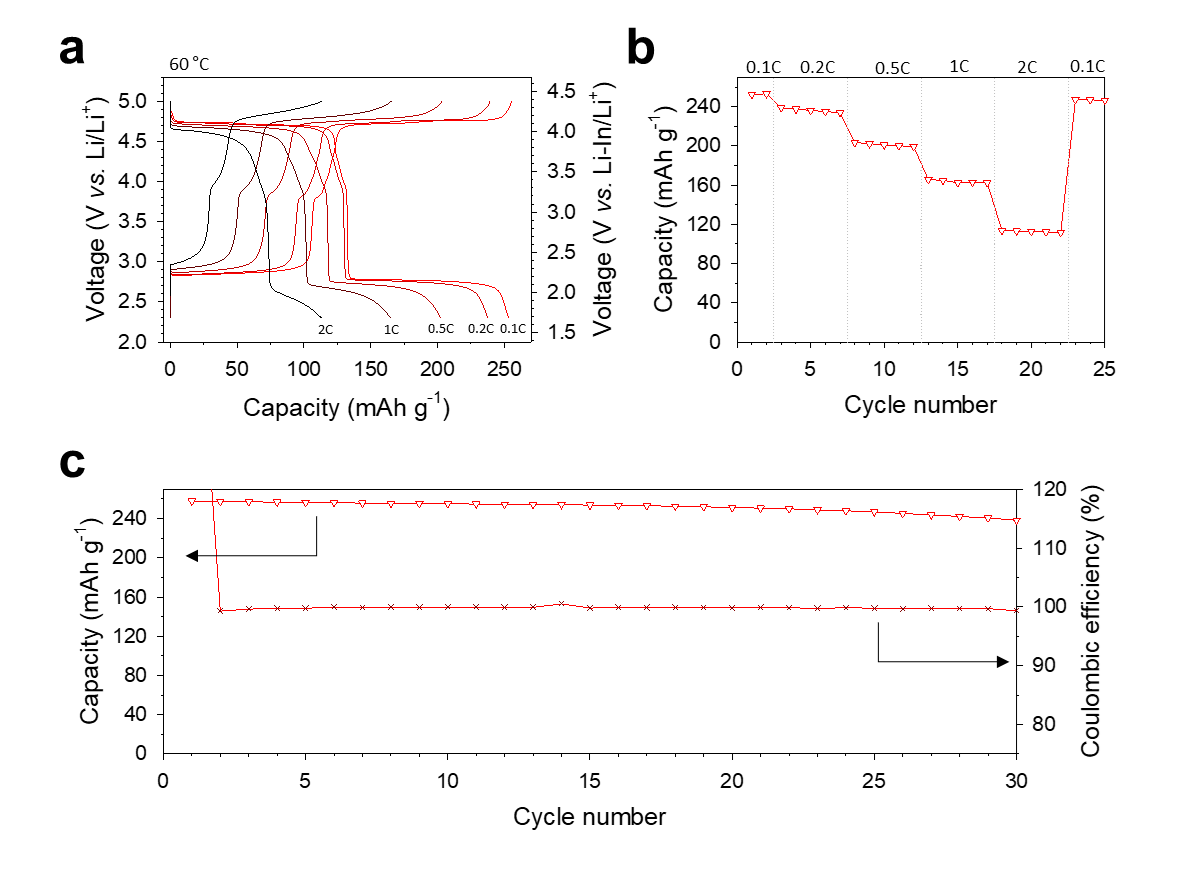


**Supplementary Fig. 47 Low-voltage-extended operation of LiCl**–4**LTF**–**LNMO. a,b,** Charge–discharge voltage profiles at different C-rates of LiCl–4LTF–LNMO electrodes in LNMO|(ZrO2–LZCF)|LPSCl|(Li–In) half cells between 2.3 and 5.0 V (vs. Li/Li+) at 60 °C (**a**), corresponding rate capability (**b**) and cycling performance at 0.1C (**c**).

**
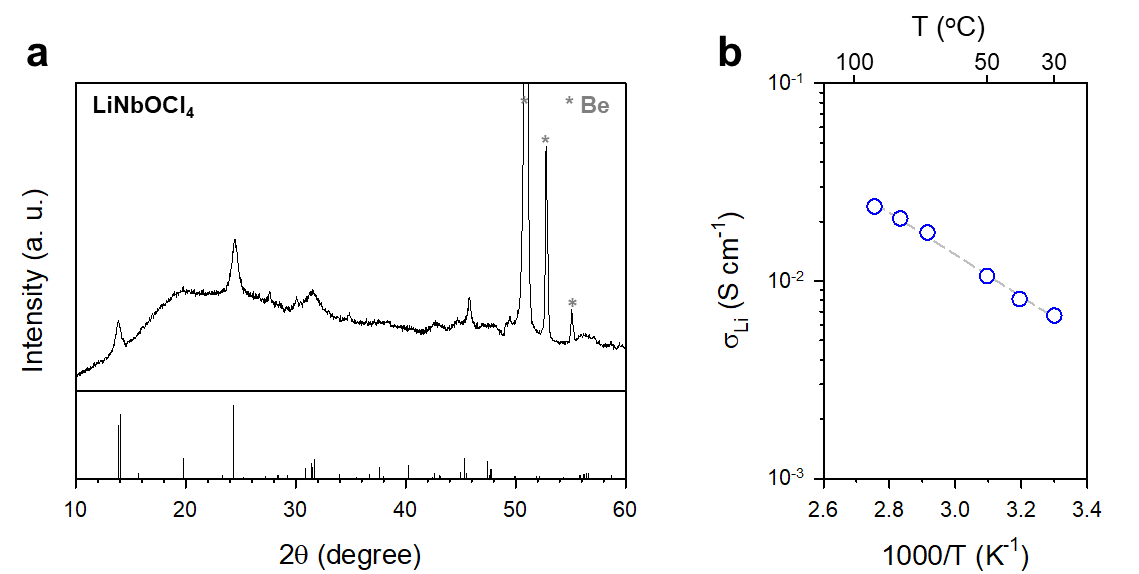
**

**Supplementary Fig. 48 a,b,** XRD pattern (**a**) and Arrhenius plot of Li+ conductivity for LiNbOCl4 (**b**).


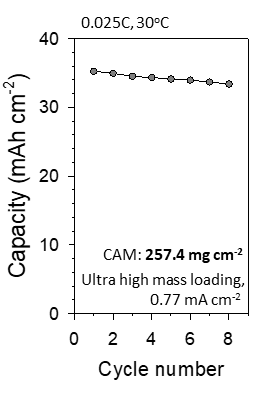


**Supplementary Fig. 49** Cycling performance of LiCl–4LTF-coated LNMO electrodes with ultrahigh mass loading (257.4 mg cm-2) at 0.77 mA cm-2 and 30 °C. Corresponding first two-cycle charge−discharge voltage profiles are plotted in Fig. 5f.


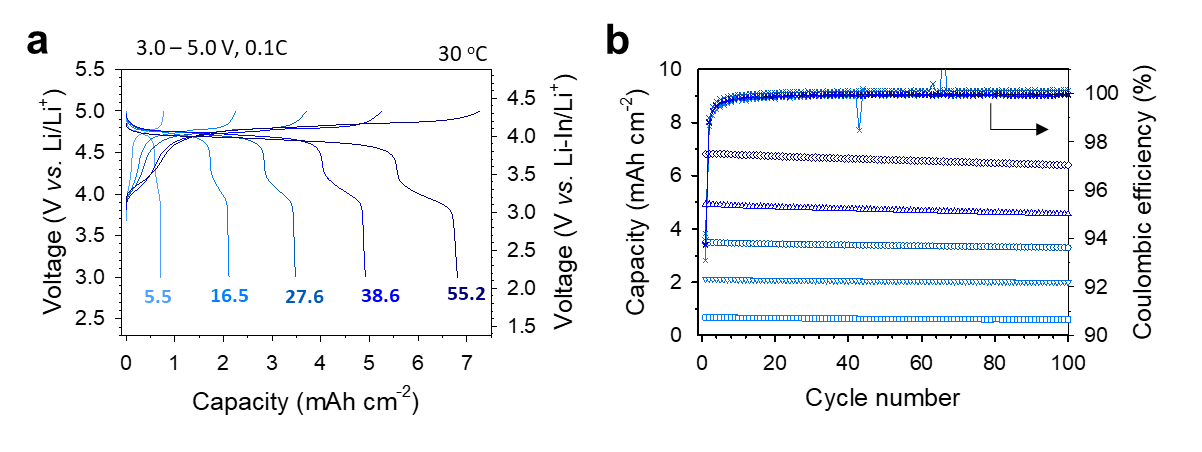


**Supplementary Fig. 50 High-mass-loading LiCl**–4**LTF**–**LNMO electrodes. a,b,** First-cycle charge–discharge voltage profiles at 0.1C and 30 °C for LiCl–4LTF-coated LNMO electrodes with different mass loadings in LNMO|LiNbOCl4|LPSCl|(Li–In) half cells between 2.3 and 5.0 V (vs. Li/Li+) (**a**) and corresponding cycling performance (**b**). The numbers in (**a**) indicate the mass loading values in mg cm-2.


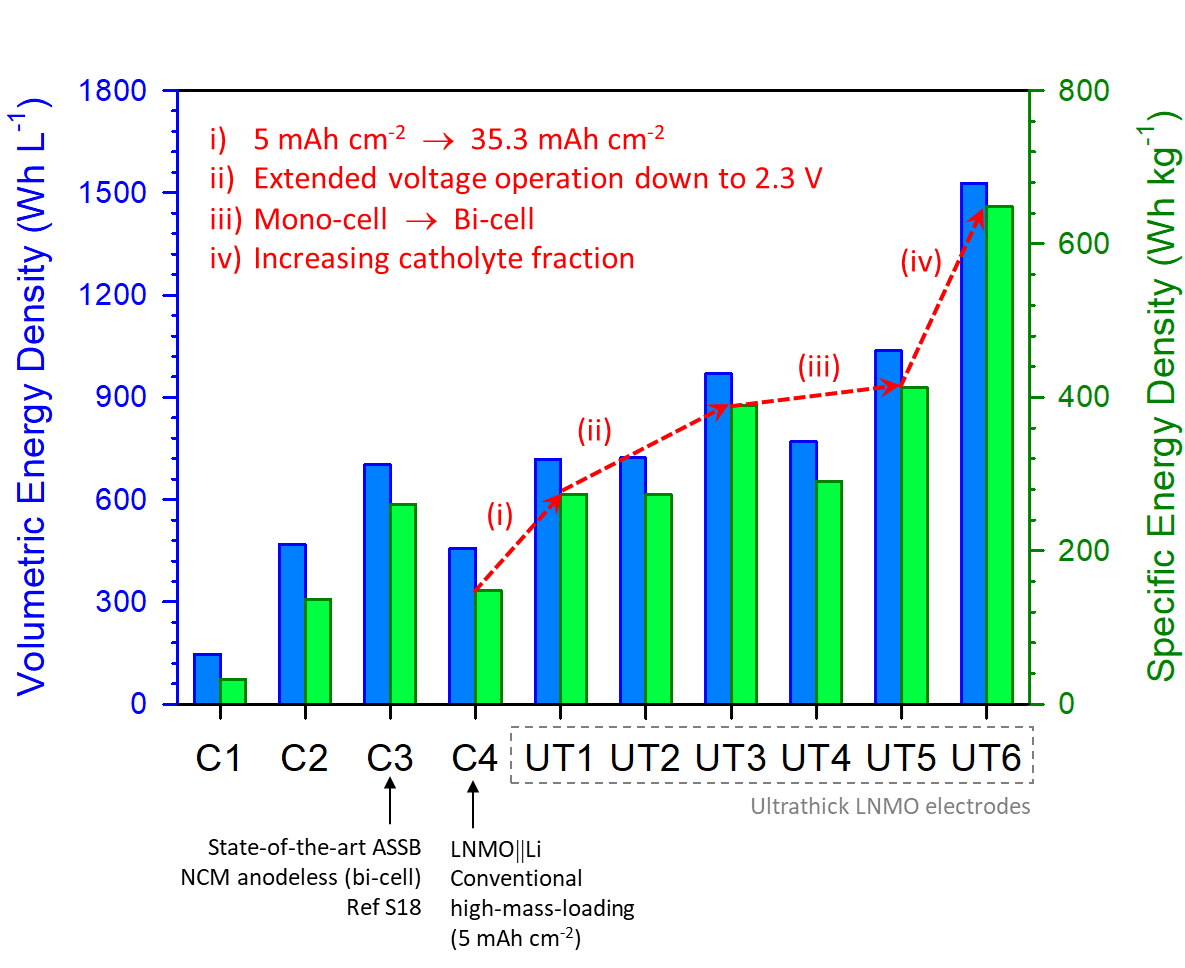


**Supplementary Fig. 51** Cell-level energy densities of different types of ASSBs presented in Supplementary Table 38.

**
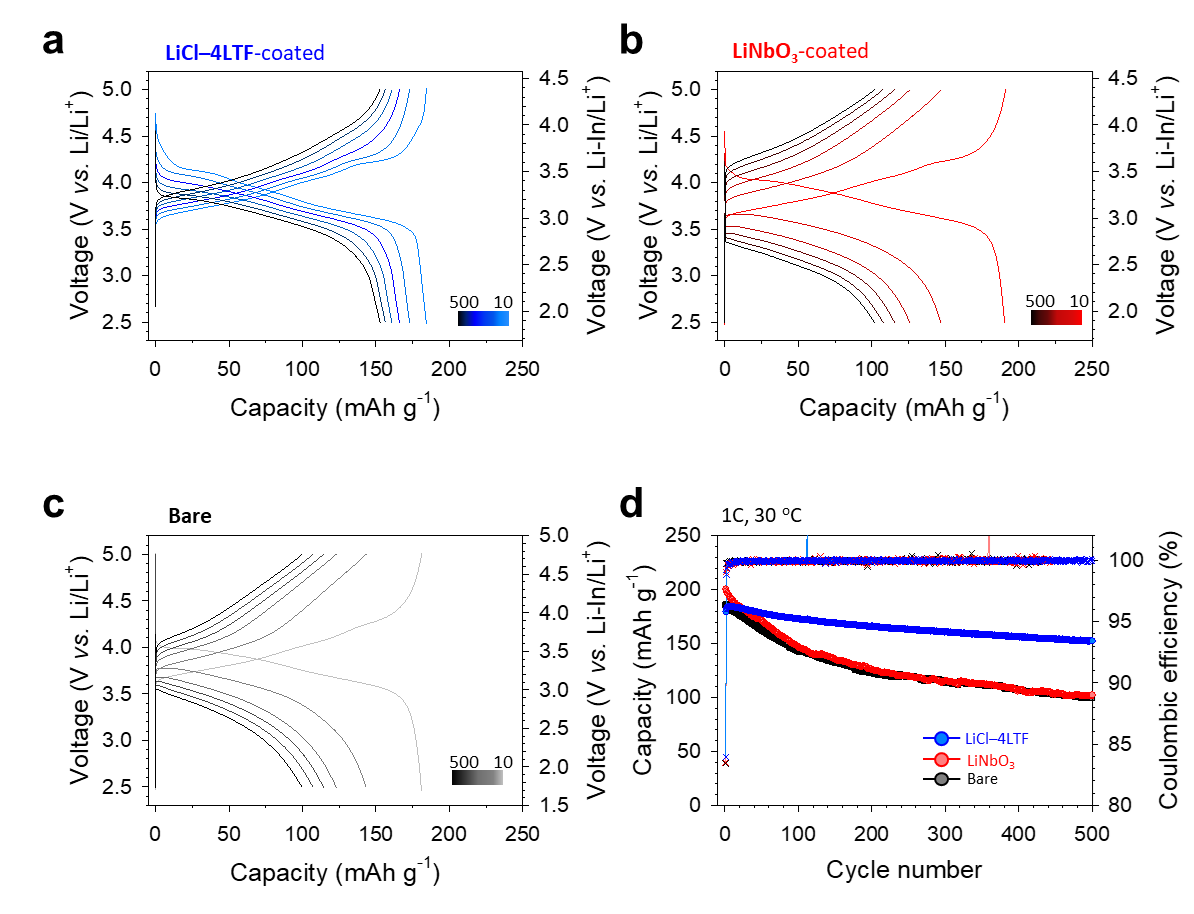
**

**Supplementary Fig. 52** **LTF**–**4LTF-coated single-crystalline LiNi0.88Co0.11Mn0.01O2.** **a−c**, Charge–discharge voltage profiles at 1C NCM88|LPSCl|(Li–In) all-solid-state half cells cycled at 2.5–5.0 V (vs. Li/Li+) for LiCl–4LTF-coated (**a**), LNbO-coated (**b**), and bare single-crystalline NCM88 (**c**). **d**, Corresponding cycling performances.**
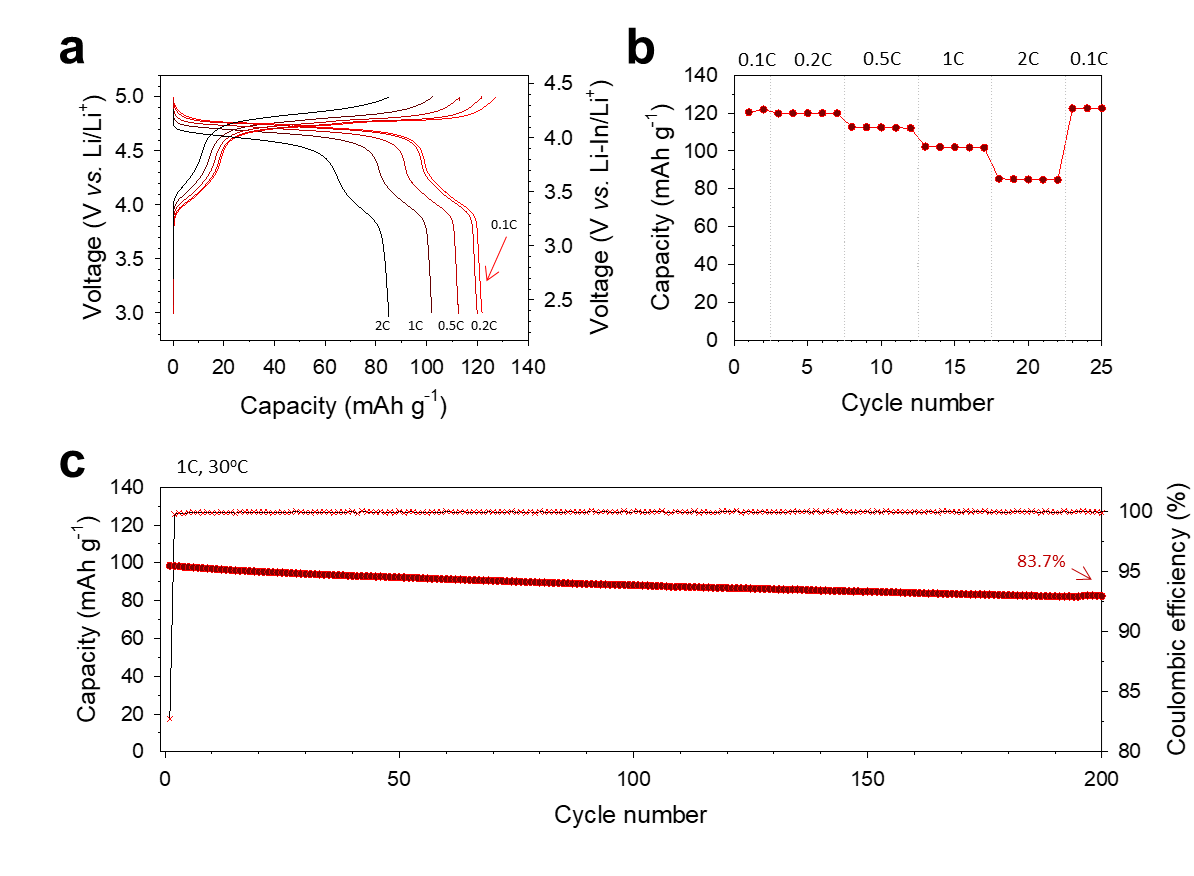
**

**Supplementary Fig. 53 Electrochemical performances of using LiCl**–**3Li3AlF6-coated LNMO. a,b,** Charge–discharge voltage profiles at different C-rates of LiCl–3Li3AlF6–LNMO electrodes in LNMO|(ZrO2–LZCF)|LPSCl|(Li–In) half cells between 3.0 and 5.0 V (vs. Li/Li+) at 30 °C (**a**), corresponding rate capability (**b**) and cycling performance at 0.1C (**c**).

*
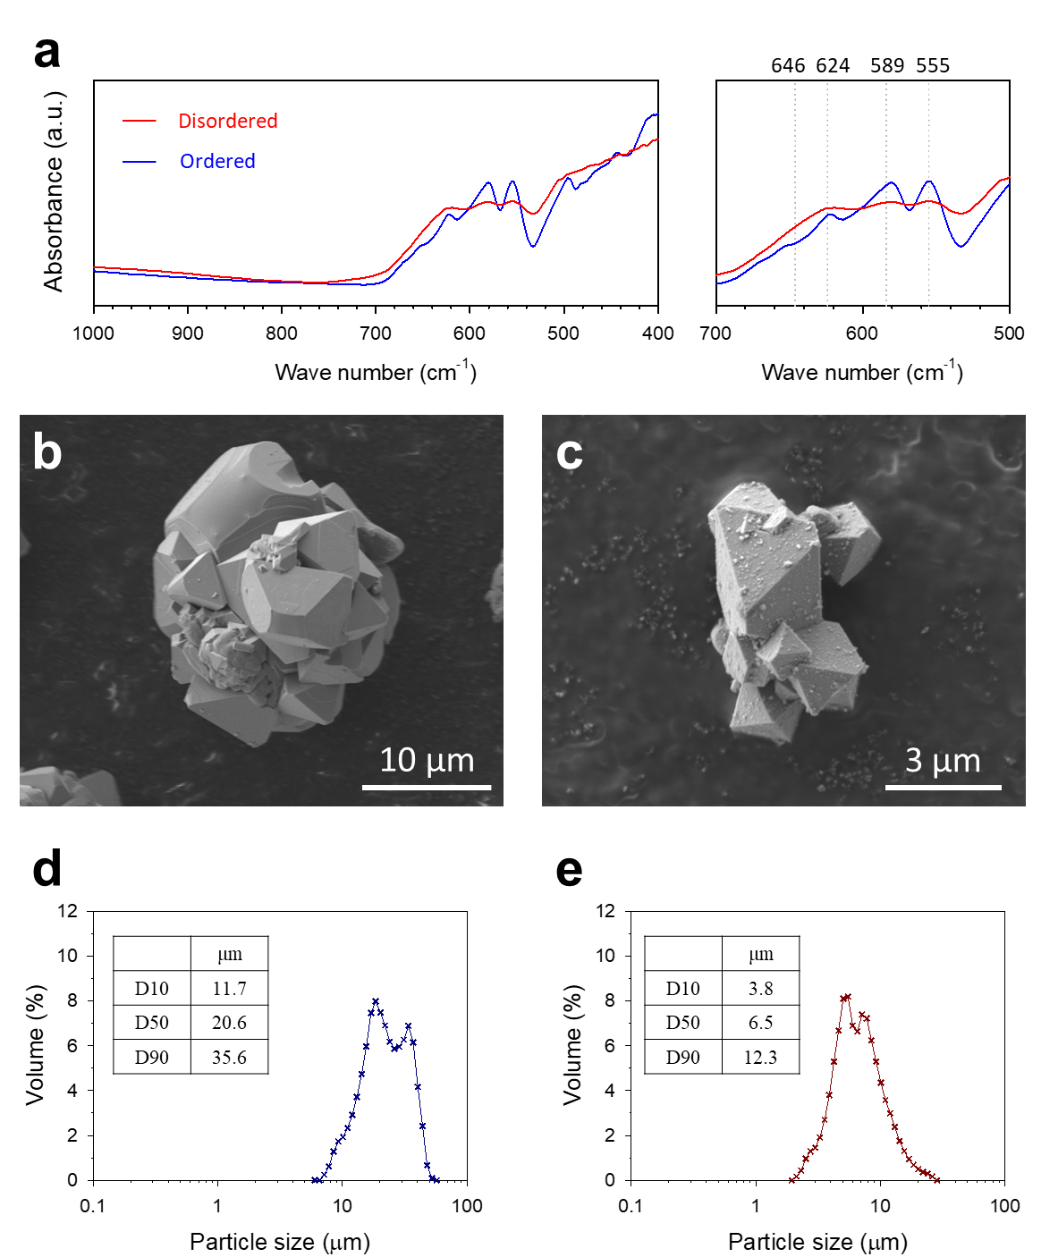
*

**Supplementary Fig. 54** **Characterization of disordered and ordered LNMO particles.** **a,** FTIR spectra of disordered and ordered LNMO samples. **b,c,** SEM images of disordered (**b**) and ordered LNMO particles (**c**). **d**,**e,** Particle size distribution for disordered (**d**) and ordered LNMO particles (**e**).

**Supplementary Note 11.** The degree of ordering in LNMO can be identified through FTIR spectra. Specifically, a higher intensity ratio of the bands at 589 cm-1 and 624 cm-1 corresponds to an ordered structure, while a lower ratio signifies a disordered structure, confirming that the two LNMOs exhibit ordered and disordered structures, respectively.

**3. Supplementary Tables.**

**Supplementary Table 1.** Li+ conductivities and activation energies of Li+-conductive fluoride SEs, from literature.

|  | **Material** | **Li+ conductivity (S cm-1)** | **Temperature (oC)** | **Ea (eV)** | **Literature** |
| --- | --- | --- | --- | --- | --- |
| 1 | LiYbF4 | 1.4 × 10-6 | 300 | 0.73 | S1 |
| 2 | Li2TiF6 | 2 × 10-4 | 300 | 0.88 | S2 |
| 3 | Li3AlF6 | 6 × 10-5 | 300 | 0.56 | S2 |
| 4 | LiF−ScF3 | 7.23 × 10-6 | 158 | 0.55 | S3 |
| 5 | LiF−NiF2 | 5.16 × 10-6 | 70 | 0.69 | S4 |
| 6 | Li2ZrF5Cl | 5.56 × 10-7 | 25 | 0.51 | S5 |
| 7 | LiAlF4 | 4.21 × 10-6 | 40 | 0.53 | S4 |
| 8 | LiCl−3Li3AlF6 | 2.74 × 10-6 | 30 | 0.53 | S6 |
| 9 | 4Li3AlF6·Li2SiF6 | 1.28 × 10-5 | 40 | 0.5 | S7 |
| 3 × 10-5 | 30 (sintering) |
| 10 | Li3AlF5.87Cl0.13 | 2 × 10-4 | 30 | 0.42 | S8 |
| 11 | LiCl−4Li2TiF6 | 1.7 × 10-5 | 30 | 0.53 | This work |

**Supplementary Note 12.** Li3AlF5.87Cl0.13 reported in reference S8 was not included to avoid any confusion because it is unclear whether their Nyquist plot shows only one semicircle and a Warburg tail. Supplementary Fig. 20 in the literature shows that two or more semicircles exist in the Nyquist plot, and the Warburg tail is not observed. This is potentially caused by the residue of the ionic liquid (BmimCl) used during the synthesis.

**Supplementary Table 2.** Performance characteristics of high-voltage spinel cathodes in ASSBs**.**

| **Ref.** | **CAMs** | **Catholyte** | **C** | **Coating materials** | **SE separator** | **1st  discharge capacity  (mAh g-1)** | **1st  discharge capacity  (mAh cm-2)** | **ICE (%)** | **Cycle**  **retention** | **Current (mA g-1)** | **T (℃)** | **Voltage  (V vs. Li/Li+)** | **CAM loading  (mg cm-2)** | **Note** |
| --- | --- | --- | --- | --- | --- | --- | --- | --- | --- | --- | --- | --- | --- | --- |
| S9 | LiNi0.5Mn1.5O4 | 80Li2S∙20P2S5 | AB | Li3PO4 (PLD) | 80Li2S∙20P2S5 | 62  (0.05C) | - | - | ~50% 20 cycles | 16.7 | 25 | 3.5-4.7 | - |  |
| S10 | LiNi0.5Mn1.5O4 | Li10GeP2S12 | AB | LiNbO3  (Sol-gel) | Li10GeP2S12 | 80 (0.05C) | - | 79.2 | ~40% 10 cycles | 7.3 | 25 | 3.5-5.0 | - |  |
| S11 | LiNi0.5Mn1.5O4-δ | Li10GeP2S12 | AB | LiNbO3  (Sol-gel) | Li10GeP2S12 | 80 (0.05C) | - | - | ~30%  20 cycles | 7.3 | 25 | 3.5-5.0 | - |  |
| S12 | LiNi0.5Mn1.5O4 | Li6PS5Cl | - | LiNbO3  (Sol-gel) | Li6PS5Cl | 115 (0.1C) | 0.13 | 84.6 | ~80% 30 cycle | 14.8 | 25 | 3.5-5.0 | 1.14 |  |
| S13 | LiCo0.5Mn1.5O4 | Li6PS5Cl | - | LiNbO3  (Sol-gel) | Li10GeP2S12 | 130 0.1C | - | - | 33% 50 Cycle | - | 25 | 2.5-5.5 | - |  |
| S14 | LiNi0.5Mn1.5O4-S0.15 | Li6PS5Cl | VGCF | - | Li6PS5Cl | 77.9 (0.1C) | 0.10 | - | ~60% 20 cycle | 14.8 | 25 | 3.0-5.0 | 1.25 | - |
| S15 | LiNi0.5Mn1.5O4 | Li3YCl6 | VGCF | LiNbO3  (Sol-gel) | Li6PS5Cl | 91.0 (0.05C) | 1.14 | 91.2 | 43.7%  50 Cycles | 20 | 30 | 3.5-4.85 | 12.54 | CCCV |
| S16 | Hollow  LiNi0.5Mn1.5O4 | Li6PS5Cl | VGCF | Al2O3 (ALD) | Li6PS5Cl | 105.5 (0.1C) | 0.84 | 86.5 | 62.1% 100 cycles | 29.2 | 30 | 3.35-5.0 | 8 | CCCV |
| S17 | LiNi0.476Mn1.475Fe0.049O4 | Li3InCl6 | VGCF | Li3PO4  (Sol-gel) | Catholyte / Li6PS5Cl | 94 (0.05C) | 0.94 | 85.4 | 68.1% 100 cycles | 9.7 | 30 | 3.5-4.85 | 10 |  |
| This Work | LiNi0.5Mn1.5O4 | ZrO2–2Li2ZrCl5F | VGCF | LiCl–4LTF | Catholyte / Li6PS5Cl | 111.0  (1C) | 0.61 | 91.7 | 77.1%  200 cycles | 120 | 30 | 3.0-5.0 | 5.5 |  |
| LiNi0.5Mn1.5O4 | ZrO2–2Li2ZrCl5F | VGCF | LiCl–4LTF | Catholyte / Li6PS5Cl | 106.0  (2C) | 0.58 | 92.0 | 75.2%  500 cycles | 240 | 30 | 3.0-5.3 | 5.5 |  |
| LiNi0.5Mn1.5O4 | ZrO2–2Li2ZrCl5F | VGCF | LiCl–4LTF | Catholyte / Li6PS5Cl | 108.4  (0.1C) | 1.19 | 79.0 | 93.3% 100 cycles | 12 | 30 | 3.0-5.0 | 11 | Gr full cell |
| LiNi0.5Mn1.5O4 | ZrO2–2Li2ZrCl5F | VGCF | LiCl–4LTF | Catholyte / Li6PS5Cl | 115.9 (0.2C) | 0.64 | 93.0 | 87.3% 100 cycles | 24 | 30 | 3.0-5.0 | 5.5 | Li metal |
| LiNi0.5Mn1.5O4 | ZrO2–2Li2ZrCl5F | VGCF | LiCl–4LTF | Catholyte / Li6PS5Cl | 257.8 (0.1C) | 1.07 | 168.4 | 92.5% 30 cycles | 12 | 60 | 2.3-5.0 | 5.5 |  |
| LiNi0.5Mn1.5O4 | LiNbOCl4 | VGCF | LiCl–4LTF | Catholyte / Li6PS5Cl | 120.6  (0.2C) | 1.36 | 88.3 | 89.1% 110 cycles | 12 | 30 | 3.0-5.0 | 11.3 | Pouch cell |
| LiNi0.5Mn1.5O4 | LiNbOCl4 | VGCF | LiCl–4LTF | Catholyte / Li6PS5Cl | 128.1 (0.1C) | 2.11 | 93.9 | 94.5% 100 cycles | 12 | 30 | 3.0-5.0 | 16.5 |  |
|  | LiNi0.5Mn1.5O4 | LiNbOCl4 | VGCF | LiCl–4LTF | Catholyte / Li6PS5Cl | 127.7 (0.1C) | 3.49 | 93.9 | 94.5% 100 cycles | 12 | 30 | 3.0-5.0 | 27.6 |  |
| LiNi0.5Mn1.5O4 | LiNbOCl4 | VGCF | LiCl–4LTF | Catholyte / Li6PS5Cl | 126.6 (0.1C) | 4.90 | 93.7 | 92.5% 100 cycles | 12 | 30 | 3.0-5.0 | 38.6 |  |
| LiNi0.5Mn1.5O4 | LiNbOCl4 | VGCF | LiCl–4LTF | Catholyte / Li6PS5Cl | 123.5 (0.1C) | 6.81 | 93.8 | 94.0% 100 cycles | 12 | 30 | 3.0-5.0 | 55.2 |  |
| LiNi0.5Mn1.5O4 | LiNbOCl4 | VGCF | LiCl–4LTF | Li3YCl6/ Li6PS5Cl | 137  (0.025C) | 35.3 | 86.3 | - | - | - | 3.0-5.3 | 257.4 |  |
| LiCoMnO4 | ZrO2–2Li2ZrCl5F | VGCF | LiCl–4LTF | Catholyte / Li6PS5Cl | 93.2  (0.2C) | 0.51 | 87.3 | 80.8%  100 cycles | 24 | 30 | 3.0-5.3 | 5.5 |  |
| LiCoMnO4 | ZrO2–2Li2ZrCl5F | VGCF | LiCl–4LTF | Catholyte / Li6PS5Cl | 87.6 (0.2C) | 0.48 | 85.7 | 80.8%  50 cycles | 24 | 30 | 3.0-5.3 | 5.5 | Li metal |
| LiFe0.5Mn1.5O4 | ZrO2–2Li2ZrCl5F | Super C | LiCl–4LTF | Catholyte / Li6PS5Cl | 113.7 (0.2C) | 0.62 | 89.1 | 72.2% 50 cycles | 24 | 30 | 3.0-5.3 | 5.5 |  |

**Supplementary Table 3. PDF fitting results of the structural model including LiF.** Phase fraction and PDF fitting results of *x*LiCl−(1-*x*)Li2TiF6 in PDF short range region (1.5−10 Å). The negative fitted weight fraction values indicate that LiF is absent in *x*LiCl−(1-*x*)Li2TiF6. This result is also consistent with that F K-edge XAS result in Supplementary Fig. 6.

| **Sample** | **Li2TiF6**  **(wt%)** | **LiCl**  **(wt%)** | **LiF**  **(wt%)** | ***delta2***  **for Li2TiF6** | **uiso for Li2TiF6** | |
| --- | --- | --- | --- | --- | --- | --- |
| LiCl−  9Li2TiF6 | 99.6  (a = b = 4.669,  c = 8.953) | 2.2  (a = b = c = 5.180) | -1.8  (a = b = c = 3.887) | 2.94 | uiso(Li4e) = 0.04  uiso(Ti2a) = 0.006  uiso(F4f) = 0.019  uiso(F8j) = 0.030 | |
| 2LiCl−8Li2TiF6 | 99.2  (a = b = 4.664,  c = 8.936) | 3.4  (a = b = c = 5.199) | -2.6  (a = b = c = 3.908) | 3.04 | uiso(Li4e) = 0.04  uiso(Ti2a) = 0.005  uiso(F4f) = 0.017  uiso(F8j) = 0.028 | |
| 3LiCl−7Li2TiF6 | 97.4  (a = b = 4.665,  c = 8.925) | 4.9  (a = b = c = 5.180) | -2.3  (a = b = c = 3.903) | 3.05 | uiso(Li4e) = 0.04  uiso(Ti2a) = 0.006  uiso(F4f) = 0.021  uiso(F8j) = 0.029 | |
| 4LiCl−6Li2TiF6 | 93.2  (a = b = 4.665,  c = 8.909) | 9.8  (a = b = c = 5.169) | -3.0  (a = b = c = 3.901) | 3.10 | uiso(Li4e) = 0.04  uiso(Ti2a) = 0.005  uiso(F4f) = 0.021  uiso(F8j) = 0.028 | |
| LiCl: *delta2* = 3.157, uiso(Li) = 0.04, uiso(Cl)= 0.014  LiF: *delta2* = 1.459, uiso(Li) = 0.014, uiso(F)= 0.006  Qmax = 21, Qdamp = 0.0352, Qbroad = 0.0215 | | | | | |

**Supplementary Note 13.** To ensure reliable phase fraction determination, the *delta2* parameter and uiso values of LiCl and LiF were fixed toavoid convergence fitting issues due to limited amounts of LiCl and LiF. Cl substitution was also excluded to simplify the model and enhance the potential influence of LiF presence.

**Supplementary Table 4.** The calculated ratio of LiF and fluoride SE sample (LTF or LiCl−4LTF), determined using the whole powder pattern fitting technique for a 10:1 weight ratio mixture, which corresponds to the data in Supplementary Fig. 7.

| **Weight fraction (%)** | **LiF** | **LiCl** | **Li2TiF6** |
| --- | --- | --- | --- |
| Li2TiF6 | 10.31 | - | 89.69 |
| LiCl−4LTF | 10.44 | 3.81 | 85.74 |

**Supplementary Note 14.** We conclude that there are no amorphous phases in Li2TiF6 or LiCl-4Li2TiF6 based on three evidences.

First, no additional peaks were observed in the PDF data other than those corresponding to calculated crystalline LiCl or Li2TiF6. Regardless of structural disorder, a repetitive building unit is always detectable in the low-R region of the PDF.S18 If an amorphous phase were included in LiCl−4LTF, peaks associated with such building units (first shell) would appear in the low Å region when the calculated LiCl and Li2TiF6 phases are subtracted from the observed data. However, the difference between observed and calculated values converges close to near zero even in the low Å region (Supplementary Fig. 14b). This finding indicates the absence of amorphous phases in LiCl−4LTF.

Second, the measured fraction of amorphous content in Li2TiF6 and LiCl−4LTF was nearly zero. To quantify potential amorphous phases, we employed the whole powder pattern fitting technique.S19,S20 HRPD measurements were conducted on Li2TiF6 and LiCl−4LTF by analyzing a mixture of fluoride sample and crystalline LiF at a 10:1 weight ratio. Corresponding Rietveld refinement results are shown in Supplementary Fig. 7, with quantitative analysis results summarized in Supplementary Table 4. For both LTF and LiCl−4LTF, the fitting confirmed ≈10 wt% of LiF and no additional phases, aside from Li2TiF6 or LiCl−4LTF, within the samples.

Third, the Ti L-edge XAS spectra showed no shoulder peaks, which would be indicative of amorphous phases. If such phases were present, we would expect shoulder peaks or reduced intensity in the t2g and eg peaks.S21 However, these features were absence in LiCl−4LTF (Fig. 1f).

**Supplementary Table 5.** Crystallographic data and Rietveld refinement results for Li2TiF6, obtained using HRPD: atomic coordinates, site occupancies, displacement parameters, and reliability factors at room temperature.

| **Crystal system** | | | Tetragonal | | |
| --- | --- | --- | --- | --- | --- |
| **Space group** | | | P 42/m n m (136) | | |
| **Lattice parameter** | | | a = b = 4.67672(5), c = 8.98702(14) | | |
| **Atom** | **x** | **y** | **z** | **Biso (Å2)** | **Occ.** |
| F1 | 0.28993(31) | 0.28993(31) | 0 | 2.229(71) | 1 |
| F2 | 0.30650(22) | 0.30650(22) | 0.34479(21) | 2.015(48) | 1 |
| Ti1 | 0 | 0 | 0 | 1.540(21) | 1 |
| Li1 | 0 | 0 | 0.33333 | 5 | 1 |
| Rp = 4.54 %, Rwp = 6.81 %, Rexp = 4.68 %, Rbragg = 11.0 %, Rf = 11.1 % | | | | | |

**Supplementary Table 6.** Crystallographic data and Rietveld refinement results for Li2TiF6 in LiCl-9Li2TiF6, obtained using HRPD: atomic coordinates, site occupancies, displacement parameters, and reliability factors at room temperature.

| **Crystal system** | | | Tetragonal | | |
| --- | --- | --- | --- | --- | --- |
| **Space group** | | | P 42/m n m (136) | | |
| **Lattice parameter** | | | a = b = 4.67120(5), c =8.98433(14) | | |
| **Atom** | **x** | **y** | **z** | **Biso (Å2)** | **Occ.** |
| F1 | 0.28897(32) | 0.28897(32) | 0 | 2.191(69) | 1 |
| F2 | 0.30756(24) | 0.30756(24) | 0.34382(20) | 2.516(53) | 1 |
| Ti1 | 0 | 0 | 0 | 1.192(20) | 1 |
| Li1 | 0 | 0 | 0.33333 | 5 | 1 |
| Rp = 5.06 %, Rwp = 7.94 %, Rexp = 4.39 %, Rbragg = 6.51 %, Rf = 5.71 % | | | | | |

**Supplementary Table 7.** Crystallographic data and Rietveld refinement results for Li2TiF6 in 2LiCl-8Li2TiF6, obtained using HRPD: atomic coordinates, site occupancies, displacement parameters, and reliability factors at room temperature.

| **Crystal system** | | | Tetragonal | | |
| --- | --- | --- | --- | --- | --- |
| **Space group** | | | P 42/m n m (136) | | |
| **Lattice parameter** | | | a = b = 4.66527(5), c = 8.97593(17) | | |
| **Atom** | **x** | **y** | **z** | **Biso (Å2)** | **Occ.** |
| F1 | 0.28669(36) | 0.28669(36) | 0 | 2.607(127) | 0.970(11) |
| Cl1 | 0.28669(36) | 0.28669(36) | 0 | 2.607(127) | 0.030(11) |
| F2 | 0.30747(25) | 0.30747(25) | 0.34357(26) | 2.447(108) | 0.991(10) |
| Cl2 | 0.30747(25) | 0.30747(25) | 0.34357(26) | 2.447(108) | 0.010(10) |
| Ti1 | 0 | 0 | 0 | 1.846(31) | 1 |
| Li1 | 0 | 0 | 0.33333 | 5 | 1 |
| Rp = 4.74 %, Rwp = 7.02 %, Rexp = 4.54%, Rbragg = 6.48 %, Rf = 6.74 % | | | | | |

**Supplementary Table 8.** Crystallographic data and Rietveld refinement results for Li2TiF6 in 3LiCl-7Li2TiF6, obtained using HRPD: atomic coordinates, site occupancies, displacement parameters, and reliability factors at room temperature.

| **Crystal system** | | | Tetragonal | | |
| --- | --- | --- | --- | --- | --- |
| **Space group** | | | P 42/m n m (136) | | |
| **Lattice parameter** | | | a = b = 4.66373(6), c = 8.96838(19) | | |
| **Atom** | **x** | **y** | **z** | **Biso (Å2)** | **Occ.** |
| F1 | 0.28456(42) | 0.28456(42) | 0 | 2.886(151) | 0.966(14) |
| Cl1 | 0.28456(42) | 0.28456(42) | 0 | 2.886(151) | 0.034(14) |
| F2 | 0.30741(30) | 0.30741(30) | 0.34410(30) | 2.755(131) | 0.988(12) |
| Cl2 | 0.30741(30) | 0.30741(30) | 0.34410(30) | 2.755(131) | 0.012(12) |
| Ti1 | 0 | 0 | 0 | 1.923(36) | 1 |
| Li1 | 0 | 0 | 0.33333 | 5 | 1 |
| Rp = 5.39 %, Rwp = 8.27 %, Rexp = 4.61 %, Rbragg = 5.73 %, Rf = 6.18 % | | | | | |

**Supplementary Table 9.** Crystallographic data and Rietveld refinement results for Li2TiF6 in 4LiCl-6Li2TiF6, obtained using HRPD: atomic coordinates, site occupancies, displacement parameters, and reliability factors at room temperature.

| **Crystal system** | | | Tetragonal | | |
| --- | --- | --- | --- | --- | --- |
| **Space group** | | | P 42/m n m (136) | | |
| **Lattice parameter** | | | a = b = 4.66160(5), c = 8.96626(16) | | |
| **Atom** | **x** | **y** | **z** | **Biso (Å2)** | **Occ.** |
| F1 | 0.28505(40) | 0.28505(40) | 0 | 3.277(151) | 0.955(13) |
| Cl1 | 0.28505(40) | 0.28505(40) | 0 | 3.277(151) | 0.045(13) |
| F2 | 0.30792(28) | 0.30792(28) | 0.34369(29) | 2.763(124) | 0.990(12) |
| Cl2 | 0.30792(28) | 0.30792(28) | 0.34369(29) | 2.763(124) | 0.010(12) |
| Ti1 | 0 | 0 | 0 | 2.198(38) | 1 |
| Li1 | 0 | 0 | 0.33333 | 5 | 1 |
| Rp = 5.63 %, Rwp = 8.06 %, Rexp = 4.75, Rbragg = 5.83 %, Rf = 7.55 % | | | | | |

**Supplementary Table 10.** Crystallographic data and Rietveld refinement results for Li2TiF6 with Cl substitution in 2LiCl−8Li2TiF6, obtained using cryo-HRPD: atomic coordinates, site occupancies, displacement parameters, and reliability factors at 150 K.

| **Crystal system** | | | Tetragonal | | |
| --- | --- | --- | --- | --- | --- |
| **Space group** | | | P 42/m n m (136) | | |
| **Lattice parameter** | | | a = b = 4.65221(8), c = 8.94096(27) | | |
| **Atom** | **x** | **y** | **z** | **Biso (Å2)** | **Occ.** |
| F1 | 0.28223(53) | 0.28223(53) | 0 | 2.451(163) | 0.991(15) |
| Cl1 | 0.28223(53) | 0.28223(53) | 0 | 2.451(163) | 0.009(15) |
| F2 | 0.30903(30) | 0.30903(30) | 0.34385(29) | 2.169(128) | 0.995(25) |
| Cl2 | 0.30903(30) | 0.30903(30) | 0.34385(29) | 2.169(128) | 0.005(25) |
| Ti1 | 0 | 0 | 0 | 1.659(36) | 1 |
| Li1 | 0 | 0 | 0.33333 | 3 | 1 |
| Rp = 7.87 %, Rwp = 10.1 %, Rexp = 6.01%, Rbragg = 5.31 %, Rf = 5.50 % | | | | | |

**Supplementary Table 11.** EXAFS fitting results corresponding to Supplementary Figs. 11 and 12.

| **Pair** | **Sample** | **N** | **σ2 (Å2)** | **Range of error**  **(Å2)** | **R (Å)** | **Range of error**  **(Å)** | **ΔE**  **(eV)** | **Range of error (eV)** | **R-factor (%)** |
| --- | --- | --- | --- | --- | --- | --- | --- | --- | --- |
| Ti-F | Li2TiF6 | 6 | 0.00504 | 0.0002 | 1.890 | 0.003 | 1.70 | 0.85 | 0.34 |
| 4 | 0.00454 | 0.0017 | 3.631 | 0.014 |
| 4 | 0.00454 | 0.0017 | 3.769 | 0.014 |
| LiCl−9Li2TiF6 | 6 | 0.00448 | 0.0002 | 1.890 | 0.003 | 2.00 | 0.71 | 0.24 |
| 4 | 0.00353 | 0.0013 | 3.628 | 0.012 |
| 4 | 0.00353 | 0.0013 | 3.766 | 0.012 |
| 2LiCl−8Li2TiF6 | 6 | 0.00446 | 0.0002 | 1.888 | 0.004 | 1.78 | 0.88 | 0.36 |
| 4 | 0.00308 | 0.0016 | 3.622 | 0.016 |
| 4 | 0.00308 | 0.0016 | 3.761 | 0.016 |
| 3LiCl−7Li2TiF6 | 6 | 0.00454 | 0.0002 | 1.888 | 0.004 | 1.90 | 0.84 | 0.33 |
| 4 | 0.00368 | 0.0016 | 3.623 | 0.014 |
| 4 | 0.00368 | 0.0016 | 3.762 | 0.014 |
| 4LiCl−6Li2TiF6 | 6 | 0.00472 | 0.0002 | 1.890 | 0.004 | 1.88 | 0.88 | 0.38 |
| 4 | 0.00401 | 0.0017 | 3.623 | 0.015 |
| 4 | 0.00401 | 0.0017 | 3.761 | 0.015 |

***** E0 (eV) = 4982.60, S02 = 0.9. All spectra were Fourier transformed in k-range of 3.55 to 11.45 Å-1 and fitted in R range of 1.2 to 3.7 Å

**Supplementary Table 12.** Peak intensity and its ratio of Ti L-edge spectra of Li2TiF6 and LiCl−4LTF (2LiCl−8Li2TiF6), measured in TEY mode.

|  | **Li2TiF6** | **LiCl**−**4Li2TiF6** |
| --- | --- | --- |
| t2g (460.2 eV) | 4.515 | 5.086 |
| eg (462.7 eV) | 6.448 | 7.896 |
| Ratio of t2g/eg | 0.700 | 0.644 |

**Supplementary Table 13**. Comparison of phase fraction of *x*LiCl−(1-*x*)Li2TiF6-zClz between PDF short range region (1.5−10 Å) and long range region (1.5−30 Å).

| **Sample** | **PDF short range region**  **(1.5 ~ 10 Å)** | | **PDF long range region**  **(1.5 ~ 30 Å)** | |
| --- | --- | --- | --- | --- |
| **Li2TiF6-zClz (wt%)** | **LiCl (wt%)** | **Li2TiF6-zClz (wt%)** | **LiCl (wt%)** |
| LiCl−9Li2TiF6 | 97.9  (a = b = 4.669 Å,  c = 8.967 Å) | 2.1  (a = b = c = 5.182 Å) | 98.2  (a = b = 4.667 Å,  c = 8.987 Å) | 1.8  (a = b = c = 5.137 Å) |
| 2LiCl−8Li2TiF6 | 96.7  (a = b = 4.664 Å,  c = 8.951 Å) | 3.3  (a = b = c = 5.185 Å) | 98.5  (a = b = 4.661 Å,  c = 8.980 Å) | 1.7  (a = b = c = 5.146 Å) |
| 3LiCl−7Li2TiF6 | 95.1  (a = b = 4.664 Å,  c = 8.949 Å) | 4.9  (a = b = c = 5.177 Å) | 96.9  (a = b = 4.661 Å,  c = 8.973 Å) | 3.1  (a = b = c = 5.147 Å) |
| 4LiCl−6Li2TiF6 | 90.2  (a = b = 4.664 Å,  c = 8.936 Å) | 9.8  (a = b = c = 5.164 Å) | 92.6  (a = b = 4.660 Å,  c = 8.972 Å) | 7.4  (a = b = c = 5.145 Å) |

**Supplementary Table 14.** PDF fitting results of 1LiCl**−**9Li2TiF6 in PDF short range region (1.5−10Å).

| **Crystal system** | | | | Tetragonal | | |
| --- | --- | --- | --- | --- | --- | --- |
| **Space group** | | | | P 42/m n m (136) | | |
| **Lattice parameter** | | | | a = b = 4.66876, c = 8.96676 | | |
| **Atomic site of Li2TiF6-zClz in LiCl−9Li2TiF6** | | | | | **uiso (Å2)** | **Rw (%)** |
| **Atom** | **x** | **y** | **z** | |
| Cl1 (4f) | 0.28633 | 0.28633 | 0 | | 0.019 | 15.9 |
| F1 (4f) | 0.28633 | 0.28633 | 0 | | 0.019 |
| Cl2 (8j) | 0.30943 | 0.30943 | 0.34557 | | 0.026 |
| F2 (8j) | 0.30943 | 0.30943 | 0.34557 | | 0.026 |
| Ti (2a) | 0 | 0 | 0 | | 0.006 |
| Li (4e) | 0 | 0 | 0.33333 | | 0.04 |
| *delta2* (Li2TiF6-zClz) = 2.935, *delta2* (LiCl) = 3.157  uiso(Li) = 0.04 Å2, uiso(Cl) = 0.014 Å2  Qmax = 21 Å-1, Qdamp = 0.0352 Å-1, Qbroad = 0.0215 Å-1 | | | | | | |

**Supplementary Table 15.** PDF fitting results of 2LiCl**−**8Li2TiF6 in PDF short range region (1.5−10 Å).

| **Crystal system** | | | Tetragonal | | | |
| --- | --- | --- | --- | --- | --- | --- |
| **Space group** | | | P 42/m n m (136) | | | |
| **Lattice parameter** | | | a = b = 4.66408, c = 8.95118 | | | |
| **Atomic site of Li2TiF6-zClz in 2LiCl−8Li2TiF6** | | | | | **uiso (Å2)** | **Rw (%)** |
| **Atom** | **x** | **y** | | **z** |
| Cl1 (4f) | 0.28627 | 0.28627 | | 0 | 0.024 | 14.6 |
| F1 (4f) | 0.28627 | 0.28627 | | 0 | 0.024 |
| Cl2 (8j) | 0.30734 | 0.30734 | | 0.34693 | 0.025 |
| F2 (8j) | 0.30734 | 0.30734 | | 0.34693 | 0.025 |
| Ti (2a) | 0 | 0 | | 0 | 0.005 |
| Li (4e) | 0 | 0 | | 0.33333 | 0.04 |
| *delta2* (Li2TiF6-zClz) = 3.037, *delta2* (LiCl)= 3.157  uiso(Li) = 0.04 Å2, uiso(Cl) = 0.014 Å2  Qmax = 21 Å-1, Qdamp = 0.0352 Å-1, Qbroad = 0.0215 Å-1 | | | | | | |

**Supplementary Table 16.** PDF fitting results of 3LiCl**−**7Li2TiF6 in PDF short range region (1.5−10 Å).

| **Crystal system** | | | Tetragonal | | | |
| --- | --- | --- | --- | --- | --- | --- |
| **Space group** | | | P 42/m n m (136) | | | |
| **Lattice parameter** | | | a = b = 4.66443, c = 8.94883 | | | |
| **Atomic site of Li2TiF6-zClz in 3LiCl−7Li2TiF6** | | | | | **uiso(Å2)** | **Rw (%)** |
| **Atom** | **x** | **y** | | **z** |
| Cl1 (4f) | 0.28526 | 0.28526 | | 0 | 0.024 | 13.4 |
| F1 (4f) | 0.28526 | 0.28526 | | 0 | 0.024 |
| Cl2 (8j) | 0.30900 | 0.30900 | | 0.34646 | 0.025 |
| F2 (8j) | 0.30900 | 0.30900 | | 0.34646 | 0.025 |
| Ti (2a) | 0 | 0 | | 0 | 0.006 |
| Li (4e) | 0 | 0 | | 0.33333 | 0.04 |
| *delta2* (Li2TiF6-zClz) = 3.112, *delta2* (LiCl) = 3.157  uiso(Li) = 0.04 Å2, uiso(Cl) = 0.014 Å2  Qmax = 21 Å-1, Qdamp = 0.0352 Å-1, Qbroad = 0.0215 Å-1 | | | | | | |

**Supplementary Table 17.** PDF fitting results of 4LiCl**−**6Li2TiF6 in PDF short range region (1.5−10 Å).

| **Crystal system** | | | Tetragonal | | | |
| --- | --- | --- | --- | --- | --- | --- |
| **Space group** | | | P 42/m n m (136) | | | |
| **Lattice parameter** | | | a = b = 4.66417, c = 8.93555 | | | |
| **Atomic site of Li2TiF6-zClz in 4LiCl−6Li2TiF6** | | | | | **uiso(Å2)** | **Rw (%)** |
| **Atom** | **x** | **y** | | **z** |
| Cl1 (4f) | 0.28594 | 0.28594 | | 0 | 0.028 | 16.3 |
| F1 (4f) | 0.28594 | 0.28594 | | 0 | 0.028 |
| Cl2 (8j) | 0.30805 | 0.30805 | | 0.34732 | 0.025 |
| F2 (8j) | 0.30805 | 0.30805 | | 0.34732 | 0.025 |
| Ti (2a) | 0 | 0 | | 0 | 0.005 |
| Li (4e) | 0 | 0 | | 0.33333 | 0.04 |
| *delta2* (Li2TiF6-zClz) = 3.037, *delta2* (LiCl)= 3.157  uiso(Li) = 0.04 Å2, uiso(Cl) = 0.014 Å2  Qmax = 21 Å-1, Qdamp = 0.0352 Å-1, Qbroad = 0.0215 Å-1 | | | | | | |

**Supplementary Table 18.** PDF fitting results of LiCl**−**9Li2TiF6 in PDF long range region (1.5−30 Å).

| **Crystal system** | | | Tetragonal | | | |
| --- | --- | --- | --- | --- | --- | --- |
| **Space group** | | | P 42/m n m (136) | | | |
| **Lattice parameter** | | | a = b = 4.66657, c = 8.98679 | | | |
| **Atomic site of Li2TiF6-zClz in LiCl−9Li2TiF6** | | | | | **uiso(Å2)** | **Rw (%)** |
| **Atom** | **x** | **y** | | **z** |
| Cl1 (4f) | 0.28351 | 0.28351 | | 0 | 0.025 | 15.8 |
| F1 (4f) | 0.28351 | 0.28351 | | 0 | 0.025 |
| Cl2 (8j) | 0.30719 | 0.30719 | | 0.34544 | 0.027 |
| F2 (8j) | 0.30719 | 0.30719 | | 0.34544 | 0.027 |
| Ti (2a) | 0 | 0 | | 0 | 0.008 |
| Li (4e) | 0 | 0 | | 0.33333 | 0.04 |
| *delta2* (Li2TiF6-zClz) = 3.043, *delta2* (LiCl) = 3.157  uiso(Li) = 0.04 Å2, uiso(Cl) = 0.014 Å2  Qmax = 21 Å-1, Qdamp = 0.0352 Å-1, Qbroad = 0.0215 Å-1 | | | | | | |

**Supplementary Table 19.** PDF fitting results of 2LiCl**−**8Li2TiF6 in PDF long range region (1.5−30 Å).

| **Crystal system** | | | Tetragonal | | | |
| --- | --- | --- | --- | --- | --- | --- |
| **Space group** | | | P 42/m n m (136) | | | |
| **Lattice parameter** | | | a = b = 4.66118, c = 8.98012 | | | |
| **Atomic site of Li2TiF6-zClz in 2LiCl−8Li2TiF6** | | | | | **uiso(Å2)** | **Rw (%)** |
| **Atom** | **x** | **y** | | **z** |
| Cl1 (4f) | 0.28406 | 0.28406 | | 0 | 0.023 | 16.2 |
| F1 (4f) | 0.28406 | 0.28406 | | 0 | 0.023 |
| Cl2 (8j) | 0.30745 | 0.30745 | | 0.34607 | 0.026 |
| F2 (8j) | 0.30745 | 0.30745 | | 0.34607 | 0.026 |
| Ti (2a) | 0 | 0 | | 0 | 0.007 |
| Li (4e) | 0 | 0 | | 0.33333 | 0.04 |
| *delta2* (Li2TiF6-zClz) = 3.108, *delta2* (LiCl) = 3.157  uiso(Li) = 0.04 Å2, uiso(Cl) = 0.014 Å2  Qmax = 21 Å-1, Qdamp = 0.0352 Å-1, Qbroad = 0.0215 Å-1 | | | | | | |

**Supplementary Table 20.** PDF fitting results of 3LiCl**−**7Li2TiF6 in PDF long range region (1.5−30 Å).

| **Crystal system** | | | Tetragonal | | | |
| --- | --- | --- | --- | --- | --- | --- |
| **Space group** | | | P 42/m n m (136) | | | |
| **Lattice parameter** | | | a = b = 4.66103, c = 8.97297 | | | |
| **Atomic site of Li2TiF6-zClz in 3LiCl−7Li2TiF6** | | | | | **uiso(Å2)** | **Rw (%)** |
| **Atom** | **x** | **y** | | **z** |
| Cl1 (4f) | 0.28264 | 0.28264 | | 0 | 0.023 | 16.5 |
| F1 (4f) | 0.28264 | 0.28264 | | 0 | 0.023 |
| Cl2 (8j) | 0.30768 | 0.30768 | | 0.34607 | 0.027 |
| F2 (8j) | 0.30768 | 0.30768 | | 0.34607 | 0.027 |
| Ti (2a) | 0 | 0 | | 0 | 0.008 |
| Li (4e) | 0 | 0 | | 0.33333 | 0.04 |
| *delta2* (Li2TiF6-zClz) = 3.168, *delta2* (LiCl) = 3.157  uiso(Li) = 0.04 Å2, uiso(Cl) = 0.014 Å2  Qmax = 21 Å-1, Qdamp = 0.0352 Å-1, Qbroad = 0.0215 Å-1 | | | | | | |

**Supplementary Table 21.** PDF fitting results of 4LiCl**−**6Li2TiF6 in PDF long range region (1.5−30 Å).

| **Crystal system** | | | Tetragonal | | | |
| --- | --- | --- | --- | --- | --- | --- |
| **Space group** | | | P 42/m n m (136) | | | |
| **Lattice parameter** | | | a = b = 4.65950, c = 8.97245 | | | |
| **Atomic site of Li2TiF6-zClz in 4LiCl−6Li2TiF6** | | | | | **uiso(Å2)** | **Rw (%)** |
| **Atom** | **x** | **y** | | **z** |
| Cl1 (4f) | 0.28336 | 0.28336 | | 0 | 0.022 | 19.8 |
| F1 (4f) | 0.28336 | 0.28336 | | 0 | 0.022 |
| Cl2 (8j) | 0.30859 | 0.30859 | | 0.34612 | 0.027 |
| F2 (8j) | 0.30859 | 0.30859 | | 0.34612 | 0.027 |
| Ti (2a) | 0 | 0 | | 0 | 0.007 |
| Li (4e) | 0 | 0 | | 0.33333 | 0.04 |
| *delta2* (Li2TiF6-zClz) = 3.203, *delta2* (LiCl) = 3.157  uiso(Li) = 0.04 Å2, uiso(Cl) = 0.014 Å2  Qmax = 21 Å-1, Qdamp = 0.0352 Å-1, Qbroad = 0.0215 Å-1 | | | | | | |

**Supplementary Table 22.** Fraction of substituted Cl in Li2TiF6-*x*Cl*x*, obtained by PDF fitting with various ranges and by HRPD.

| **Sample** | **Total fraction of Cl substitution (%)** | | |
| --- | --- | --- | --- |
| **HRPD** | **PDF (1.5**−**30 Å)** | **PDF (1.5**−**10 Å)** |
| LiCl−9Li2TiF6 | 0 | 2.031 | 2.214 |
| 2LiCl−8Li2TiF6 | 1.640 | 3.088 | 3.738 |
| 3LiCl−7Li2TiF6 | 1.927 | 4.187 | 5.416 |
| 4LiCl−6Li2TiF6 | 2.054 | 4.409 | 5.688 |

**Supplementary Note 15.** To ensure reliable phase fraction determination, the *delta2* parameter and uiso values of LiCl were fixed to avoid convergence fitting issues due to the limited amount of LiCl. The atomic site of LiCl was fixed. The uiso value for the substituted Cl atom was set to match that of the F atom at the same site. The Cl substitution ratio is provided in Supplementary Table 22, and the lattice parameters of each component across different fitting ranges are shown in Supplementary Tables 14−21

**Supplementary Table 23.** Cl/Ti ratio obtained by XPS and XRF measurements of LiCl−4LTF.

|  | **Cl/Ti ratio** |
| --- | --- |
| XPS in 2 nm | 0.033563 |
| XRF measurement | 0.029412 |
| Nominal composition | 0.249275 |

**Supplementary Note 16.** Argon ion sputtering was performed to remove the surface layer to a depth of 2 nm for the XPS measurement.

**Supplementary Table 24.** Cl/Ti ratio in HRPD fitting of *x*LiCl−(1-*x*)Li2TiF6.

| **Sample** | **Cl/Ti ratio** | | |
| --- | --- | --- | --- |
| **Nominal composition** | **HRPD** |
| Li2TiF6 | 0 | 0 |
| LiCl−9Li2TiF6 | 0.11 | 0.07 |
| 2LiCl−8Li2TiF6 | 0.25 | 0.07 |
| 3LiCl−7Li2TiF6 | 0.43 | 0.20 |
| 4LiCl−6Li2TiF6 | 0.67 | 0.50 |

**Supplementary Table 25.** Lattice parameters and variances of Li2TiF6, Li2.125TiF6, Li2TiF5.875Cl0.125, Li2.125TiF5.875Cl0.125, Li2.25TiF6, Li2TiF5.75Cl0.25,and Li2.25TiF5.75Cl0.25 obtained from DFT calculations.

| **Sample** | **Lattice parameter (Å)** | | | **Variance in lattice parameter (%)** | | | **Angle (deg.)** | | |
| --- | --- | --- | --- | --- | --- | --- | --- | --- | --- |
| **a** | **b** | **c** | **a** | **b** | **c** | **α** | **β** | **γ** |
| Li2TiF6 | 9.4436 | 9.4436 | 9.0689 | - | - | - | 90 | 90 | 90 |
| Li2.125TiF6 | 9.4311 | 9.4311 | 9.0294 | -0.13 | -0.13 | -0.43 | 90 | 90 | 90 |
| Li2TiF5.875Cl0.125 | 9.4812 | 9.4812 | 9.1267 | +0.40 | +0.40 | +0.64 | 89.833 | 89.833 | 89.102 |
| Li2.125TiF5.875Cl0.125 | 9.545 | 9.5334 | 9.1143 | +1.10 | +0.95 | +0.50 | 90.150 | 89.808 | 91.569 |
| Li2.25TiF6 | 9.4834 | 9.4822 | 9.065 | +0.42 | +0.41 | -0.04 | 89.992 | 89.992 | 89.986 |
| Li2TiF5.75Cl0.25 | 9.5632 | 9.5608 | 9.1749 | +1.30 | +1.20 | +1.20 | 90.412 | 89.440 | 92.192 |
| Li2.25TiF5.75Cl0.25 | 9.5845 | 9.604 | 9.2642 | +1.50 | +1.70 | +2.20 | 89.785 | 90.666 | 90.043 |

**Supplementary Table 26.** Reaction energies for calculated structures, determined from DFT calculations.

| **Reactant** | **LiCl + 8LiF + 4TiF4** | **Reaction E (eV/f.u.)** | **Reaction E (eV/atom)** |
| --- | --- | --- | --- |
| **Reaction 1.**  Pure phase | LiCl + 4Li2TiF6 | -2.651 | -0.07 |
| **Reaction 2.**  Cl2 gas + Li insertion | 0.5LiCl + 4Li2.125TiF6 + 0.25Cl2(g) | -1.686 | -0.044 |
| 4Li2.25TiF6 + 0.5Cl2(g) | -0.809 | -0.021 |
| **Reaction 3.**  Cl sub. + LiF form. | 0.5LiCl + 4Li2TiF5.875Cl0.125 + 0.5LiF | -2.237 | -0.059 |
| 4Li2TiF5.75Cl0.25 + LiF | -1.927 | -0.051 |
| **Reaction 4.**  Cl sub. + F2 form  + Li insertion | 0.5LiCl + 4Li2.125TiF5.875Cl0.125 + 0.25F2(g) | -0.297 | -0.008 |
| 4Li2.25TiF5.75Cl0.25 + 0.5F2(g) | 2.021 | 0.053 |

**Supplementary Table 27**. PDF fitting results of Li2TiF6 in LiCl−4Li2TiF6 from 1.5 to 10 Å.

| **Crystal system** | | | | Tetragonal | |
| --- | --- | --- | --- | --- | --- |
| **Space group** | | | | P 42/m n m (136) | |
| **Lattice parameter** | | | | a = b = 4.64698 Å  c = 8.99509 Å  α = β = γ = 90**°** | |
| **Atomic site of Li2TiF6 in LiCl**−**4Li2TiF6** | | | | **uiso (Å2)** | **Rw (%)** |
| **Atom** | **x** | **y** | **z** |
| F1 (4f) | 0.283629 | 0.283629 | 0 | 0.018 | 8.8 |
| F2 (8j) | 0.302724 | 0.302724 | 0.349142 | 0.012 |
| Ti (2a) | 0 | 0 | 0 | 0.004 |
| Li (4e) | 0 | 0 | 0.33333 | 0.04 |
| *delta2* (Li2TiF6) = 3.475, *delta2* (LiCl) = 3.139  uiso(Li) = 0.04 Å2, uiso(Cl) = 0.013 Å2  Qmax = 21 Å-1, Qdamp = 0.0352 Å-1, Qbroad = 0.0215 Å-1 | | | | | |

**Supplementary Table 28**. PDF fitting results of Li2.125TiF6 in LiCl−4Li2TiF6 from 1.5 to 10 Å.

| **Crystal system** | | | | Triclinic | |
| --- | --- | --- | --- | --- | --- |
| **Space group** | | | | P 1 (1) | |
| **Lattice parameter** | | | | a = b = 8.88577 Å  c = 9.38535 Å  α = β = γ = 90**°** | |
| **Atomic site of Li2.125TiF6 in LiCl−4Li2TiF6** | | | | **uiso (Å2)** | **Rw (%)** |
| **Atom** | **x** | **y** | **z** |
| Li | 0.33978 | 0.000285 | 0.00276 | 0.04 | 8.8 |
| 0.33978 | 0.99972 | 0.49724 |
| 0.33847 | 0.4991 | 0.99873 |
| 0.33847 | 0.5009 | 0.50127 |
| 0.84153 | 0.27578 | 0.25247 |
| 0.83801 | 0.25046 | 0275106 |
| 0.84153 | 0.72422 | 0.24753 |
| 0.83801 | 0.74954 | 0.74894 |
| 0.16022 | 0.24724 | 0.25028 |
| 0.16153 | 0.25127 | 0.7491 |
| 0.16022 | 0.75276 | 0.24971 |
| 0.16153 | 0.74873 | 0.7509 |
| 0.65847 | 0.99753 | 0.52578 |
| 0.65847 | 0.99753 | 0.52578 |
| 0.66199 | 0.50106 | 0.99954 |
| 0.66199 | 0.49894 | 0.50046 |
| 0.75 | 0.0 | 0.25 |
| Ti | 0.00225 | 0.00158 | 0.9977 | 0.00968915 |
| 0.00225 | 0.99842 | 0.5023 |
| 0.00136 | 0.49973 | 0.99753 |
| 0.00136 | 0.50027 | 0.50247 |
| 0.49775 | 0.25229 | 0.25158 |
| 0.49865 | 0.25247 | 0.74973 |
| 0.49775 | 0.7477 | 0.24842 |
| 0.49865 | 0.74753 | 0.75027 |
| F | 0.50529 | 0.10561 | 0.3917 | 0.0697734 |
| 0.49829 | 0.10794 | 0.89237 |
| 0.50197 | 0.60892 | 0.39398 |
| 0.49994 | 0.60646 | 0.89367 |
| 0.99471 | 0.1417 | 0.14439 |
| 0.99803 | 0.14398 | 0.64108 |
| 0.00171 | 0.64237 | 0.14206 |
| 0.00006 | 0.64367 | 0.64354 |
| 0.00171 | 0.35763 | 0.35794 |
| 0.00006 | 0.35633 | 0.85646 |
| 0.99471 | 0.8583 | 0.35561 |
| 0.99803 | 0.85602 | 0.85892 |
| 0.50197 | 0.39108 | 0.10602 |
| 0.49994 | 0.39354 | 0.60633 |
| 0.50529 | 0.89439 | 0.1083 |
| 0.49829 | 0.89206 | 0.60763 |
| 0.65614 | 0.34884 | 0.3458 |
| 0.65383 | 0.34728 | 0.84678 |
| 0.65887 | 0.85133 | 0.34362 |
| 0.65471 | 0.84585 | 0.8443 |
| 0.84113 | 0.09362 | 0.39868 |
| 0.84386 | 0.0958 | 0.90116 |
| 0.84529 | 0.5943 | 0.40415 |
| 0.84617 | 0.59678 | 0.90273 |
| 0.34487 | 0.15413 | 0.15368 |
| 0.34673 | 0.15384 | 0.65243 |
| 0.34486 | 0.65259 | 0.1512 |
| 0.34452 | 0.65226 | 0.65335 |
| 0.34486 | 0.34741 | 0.3488 |
| 0.34452 | 0.34774 | 0.84665 |
| 0.34487 | 0.84588 | 0.34632 |
| 0.34673 | 0.84616 | 0.84757 |
| 0.84529 | 0.40529 | 0.09585 |
| 0.84617 | 0.40322 | 0.59728 |
| 0.84113 | 0.90638 | 0.10133 |
| 0.84386 | 0.9042 | 0.59884 |
| 0.15327 | 0.40243 | 0.09616 |
| 0.15548 | 0.40335 | 0.59774 |
| 0.15513 | 0.90368 | 0.09588 |
| 0.15515 | 0.9012 | 0.59741 |
| 0.15513 | 0.09632 | 0.40413 |
| 0.15515 | 0.0988 | 0.90259 |
| 0.15327 | 0.59757 | 0.40384 |
| 0.15548 | 0.59665 | 0.90226 |
| 0.65887 | 0.14868 | 0.15638 |
| 0.65471 | 0.15415 | 0.6557 |
| 0.65614 | 0.65116 | 0.1542 |
| 0.65383 | 0.65273 | 0.65322 |
| *delta2* (Li2.125TiF6) = 1.621, *delta2* (LiCl) = 3.139  uiso(Li) = 0.04 Å2, uiso(Cl) = 0.013 Å2  Qmax = 21 Å-1, Qdamp = 0.0352 Å-1, Qbroad = 0.0215 Å-1 | | | | | |

**Supplementary Table 29**. PDF fitting results of Li2.125TiF6Cl5.875 in LiCl−4Li2TiF6 from 1.5 to 10 Å.

| **Crystal system** | | | | | | | Triclinic | | | |
| --- | --- | --- | --- | --- | --- | --- | --- | --- | --- | --- |
| **Space group** | | | | | | | P 1 (1) | | | |
| **Lattice parameter** | | | | | | | *a* = 8.87697 **Å**,  *b* = 9.57953 **Å**  *c* = 9.34489 **Å**  *α* = 91.7296**°**  *β* = 91.7296**°**  *γ* = 90.1026**°** | | | |
| **Atomic site of Li2.125TiF5.875Cl0.125 in LiCl−4Li2TiF6** | | | | | | | **uiso (Å2)** | | **Rw (%)** | |
| **Atom** | **x** | | **y** | | **z** | |
| Li | 0.34111 | 0.00283 | | 0.00247 | | 0.04 | | 8.8 | |
| 0.33363 | 0.96685 | | 0.52889 | |
| 0.158 | 0.75621 | | 0.2539 | |
| 0.1599 | 0.74842 | | 0.75375 | |
| 0.66242 | 0.1171 | | 0.97186 | |
| 0.66001 | 0.98882 | | 0.53003 | |
| 0.66274 | 0.50012 | | 0.99891 | |
| 0.66337 | 0.4972 | | 0.50013 | |
| 0.73477 | 0.00283 | | 0.25434 | |
| 0.34177 | 0.49732 | | 0.000125 | |
| 0.3409 | 0.50433 | | 0.49781 | |
| 0.84001 | 0.2868 | | 0.23317 | |
| 0.83724 | 0.24956 | | 0.74922 | |
| 0.84104 | 0.71929 | | 0.2599 | |
| 0.83597 | 0.74667 | | 0.75252 | |
| 0.15867 | 0.27636 | | 0.22039 | |
| 0.15884 | 0.24492 | | 0.74619 | |
| Ti | 0.000682 | 0.00565 | | 0.99962 | | 0.00471025 | |
| 0.99135 | 0.98521 | | 0.51268 | |
| 0.00168 | 0.50872 | | 0.98914 | |
| 0.00159 | 0.4972 | | 0.50123 | |
| 0.5026 | 0.25631 | | 0.24806 | |
| 0.49847 | 0.25191 | | 0.7489 | |
| 0.49839 | 0.74588 | | 0.25013 | |
| 0.49907 | 0.74308 | | 0.75617 | |
| Cl | 0.1699 | 0.10219 | | 0.39267 | | 0.013298 | |
| F | 0.000289 | 0.36058 | | 0.85145 | | 0.013298 | |
| 0.99869 | 0.63852 | | 0.64491 | |
| 0.99895 | 0.36655 | | 0.34526 | |
| 0.00252 | 0.64679 | | 0.13975 | |
| 0.15817 | 0.41357 | | 0.08433 | |
| 0.15321 | 0.59437 | | 0.40858 | |
| 0.14991 | 0.91246 | | 0.10067 | |
| 0.15319 | 0.09752 | | 0.90524 | |
| 0.14924 | 0.89124 | | 0.60629 | |
| 0.15177 | 0.39774 | | 0.59188 | |
| 0.15437 | 0.60255 | | 0.89753 | |
| 0.34525 | 0.34854 | | 0.84392 | |
| 0.34606 | 0.65056 | | 0.65531 | |
| 0.35374 | 035828 | | 0.34055 | |
| 0.3467 | 0.65246 | | 0.15135 | |
| 0.35338 | 0.16287 | | 0.14331 | |
| 0.34672 | 0.83747 | | 0.35408 | |
| 0.34879 | 0.14661 | | 0.65796 | |
| 0.34768 | 0.84546 | | 0.851 | |
| 0.50097 | 0.11211 | | 0.89096 | |
| 0.50099 | 0.88507 | | 0.6147 | |
| 0.49856 | 0.3866 | | 0.60546 | |
| 0.49931 | 0.60568 | | 0.89552 | |
| 0.50933 | 0.39246 | | 0.10379 | |
| 0.50568 | 0.6095 | | 0.39238 | |
| 0.51694 | 0.1141 | | 0.37987 | |
| 0.5023 | 0.89272 | | 0.1177 | |
| 0.65307 | 0.34905 | | 0.8434 | |
| 0.65087 | 0.64644 | | 0.65784 | |
| 0.65307 | 0.15087 | | 0.65674 | |
| 0.65181 | 0.84378 | | 0.85071 | |
| 0.66149 | 0.35335 | | 0.33977 | |
| 0.65719 | 0.65267 | | 0.15489 | |
| 0.66414 | 0.15327 | | 0.15036 | |
| 0.65673 | 0.84927 | | 0.3714 | |
| 0.83271 | 0.07646 | | 0.41168 | |
| 0.84372 | 0.91841 | | 0.10549 | |
| 0.84414 | 0.09464 | | 0.90034 | |
| 0.83601 | 0.89342 | | 0.60933 | |
| 0.84683 | 0.41586 | | 0.0862 | |
| 0.84409 | 0.59172 | | 0.40912 | |
| 0.85082 | 0.39778 | | 0.59158 | |
| 0.84648 | 0.30243 | | 0.89857 | |
| 0.99193 | 0.15791 | | 0.13429 | |
| 0.98882 | 0.84336 | | 0.36562 | |
| 0.99236 | 0.13331 | | 0.65127 | |
| 0.9971 | 0.85721 | | 0.86356 | |
| *delta2* (Li2.125TiF5.875Cl0.125) = 3.438, *delta2* (LiCl) = 3.139  uiso(Li) = 0.04 Å2, uiso(Cl) = 0.013 Å2  Qmax = 21 Å-1, Qdamp = 0.0352 Å-1, Qbroad = 0.0215 Å-1 | | | | | | | | | | |

**Supplementary Table 30.** PDF fitting results obtained using model structures obtained from the DFT calculations.

|  | **Fraction (wt%)** | | | | | **Rw (%)** |
| --- | --- | --- | --- | --- | --- | --- |
| **Fitting range** | **Li2TiF6** | **Li2.125TiF6** | **Li2.125TiF5.875Cl0.125** | **LiCl** |
| Case. 0 | 1.5−10 Å | 96.7 | Excluded in the fitting | Excluded in the fitting | 3.3 | 14.7 |
| 10−30 Å | 98.8 | 1.1 | 13.6 |
| Case. 1 | 1.5−10 Å | 39.3 | 44.2 | 13.0 | 3.6 | 8.8 |
| 10−30 Å | 80.3 | 8.9 | 9.5 | 1.3 | 13.3 |
| Case. 2 | 1.5−10 Å | 49.2 | 47.9 | Excluded in the fitting | 2.9 | 12.8 |
| 10−30 Å | 91.1 | 7.5 | 1.4 | 13.8 |
| Case. 3 | 1.5−10 Å | 52.3 | Excluded in the fitting | 45.0 | 2.7 | 13.2 |
| 10−30 Å | 84.8 | 13.8 | 1.5 | 13.5 |
| Case. 4 | 1.5−10 Å | Excluded  in the fitting | 45.6 | 51.3 | 3.1 | 12.5 |
| 10−30 Å | 82.0 | 16.5 | 1.6 | 13.5 |

**Supplementary Table 31.** Phase equilibria of Li2TiF6 (stable) and Li2.125TiF6 (Ehull = 3 meV/atom) at different Li/Li+ potentials based on first principles computation.

| **Voltage (vs. Li/Li+)** | **Phase Equilibria** |
| --- | --- |
| 0 | LiF, Ti |
| 1.472 | LiF, TiF3 |
| 1.954 | Li2TiF6 |
| 6.727 | TiF4, F2 |

**Supplementary Table 32.** Phase equilibria of Li2TiF5.875Cl0.125 (Ehull = 11 meV/atom), Li2.125TiF5.875Cl0.125 (Ehull = 10 meV/atom) at different Li/Li+ potentials based on first principles computation.

| **Voltage (*vs.* Li/Li+)** | **Phase Equilibria** |
| --- | --- |
| 0 | LiF, LiCl, Ti |
| 1.472 | LiF, LiCl, TiF3 |
| 1.954 | **Li2TiF6**, LiCl, TiF3 |
| 2.148 | **Li2TiF6**, TiCl3, LiCl |
| 2.166 | TiCl4, **Li2TiF6**, LiCl |
| 4.276 | TiCl4, **Li2TiF6**, Cl2 |
| 4.671 | **Li2TiF6**, TiF4, Cl2 |
| 5.206 | **Li2TiF6**, TiF4, ClF3 |
| 5.706 | **Li2TiF6**, ClF5, TiF4 |
| 6.727 | ClF5, TiF4, F2 |

**Supplementary Table 33.** Fitted EIS results from LNMO with LiCl−4LTF or LNbO coatings in all-solid-state half cells, corresponding to Supplementary Figs. 30 and 31.

| **Electrode** | **Cycle number** | **R0 (Ω cm2)** | **R1 (Ω cm2)** | **R2 (Ω cm2)** | **R3 (Ω cm2)** |
| --- | --- | --- | --- | --- | --- |
| b−LNMO | 2 | 56.22 | 6.13 | 1893 | 5.31 |
| 10 | 53.83 | 6.19 | 6324 | 7.97 |
| 50 | 55.06 | 5.94 | 15480 | 10.13 |
| LNbO−LNMO | 2 | 50.69 | 3.27 | 593.7 | 4.00 |
| 10 | 50.34 | 3.31 | 1518 | 6.92 |
| 50 | 50.77 | 3.83 | 2594 | 9.54 |
| LiCl−LTF−LNMO | 2 | 55.18 | 9.72 | 12.75 | 5.79 |
| 10 | 53.06 | 8.36 | 15.23 | 8.57 |
| 50 | 55.70 | 9.15 | 23.36 | 10.47 |

**Supplementary Table 34.** Volume ratios in composite electrodes based on the types of CAMs, SEs, and varying weight fractions.

| **Combination** | | **Weight fraction (wt%)** | | **Volume fraction (vol%)** | | **Volume ratio** | |
| --- | --- | --- | --- | --- | --- | --- | --- |
| **CAM** | **SE** | **CAM** | **SE** | **CAM** | **SE** | **CAM** | **SE** |
| Layered | Sulfide (Li6PS5Cl) | 70 | 30 | 14.29 | 15.96 | 1 | 1.12 |
| Layered | Halide  (ZrO2-Li2ZrCl6) | 70 | 30 | 14.29 | 10.87 | 1 | 0.76 |
| 70 | 50 | 14.29 | 18.12 | 1 | 1.27 |
| Spinel | Halide  (ZrO2-Li2ZrCl6) | 50 | 50 | 11.11 | 18.12 | 1 | 1.63 |
| 70 | 30 | 15.56 | 10.87 | 1 | 0.7 |
| 70 | 50 | 15.56 | 18.12 | 1 | 1.16 |
| Spinel | Halide (LiAlCl2.5O0.75) | 70 | 35 | 15.56 | 17.77 | 1 | 1.14 |

**Supplementary Note 17.** The following density values were used based on the Materials Project: layered CAMs using LiCoO2: 4.9 g cm-3; spinel CAMs using LiNi0.5Mn1.5O4 (4.5 g cm-3); sulfide SEs using Li6PS5Cl: 1.9 g cm-3;S25 halide SEs for ZrO2-Li2ZrCl6: 2.76 g cm-3S26 and LiAlCl2.5O0.75: 1.97 g cm-3.

Given the relatively low CAM fraction (48.9%, corresponding to the 50:50:3 composition), electrodes with an increased CAM fraction (56.7 wt%, corresponding to the 70:50:3 composition) were tested, with the results presented in Supplementary Fig. 35. The cells with the decreased SE fraction (the 70:50:3 ratio) showed a decrease in capacity, particularly at higher C-rates. This is due to a reduction in the Li+ conductivity within the composite electrodes. Nonetheless, at lower C-rates, the capacities remain comparable to those observed for the 50:50:3 electrodes (equivalent to 48.9 wt% CAMs). Additionally, in long-term cycling tests at 1C, the 70:50:3 electrode demonstrated a 71.8% capacity retention after 200 cycles, which remains among the best performances reported in LNMO ASSBs studies. Additionally, capacity degradation from the decreased CAM fraction could be offset by raising the upper cutoff voltage to 5.3 V (vs. Li/Li+), underscoring the benefit of the exceptional high-voltage stability of the shielding material. Additionally, Given that the particle sizes of the spinel CAMs used in this work are relatively smaller compared to conventional layered CAMs,S27 necessitating larger amounts of SEs, there is potential for further improvements through particle size engineering.

Utilizing low-density halide SEs, such as LiAlCl2.5O0.75, is expected to reduce the SE fraction and increase the CAM fraction. However, as shown in the CV results in Supplementary Fig. 36, LiAlCl2.5O0.75 exhibited severe oxidation around 4.0 V (vs. Li/Li+), indicating poor stability and presenting challenges for integrating into high-voltage spinel-based ASSB systems. This suggests the need for further research to develop catholyte materials that achieve both low density and high-voltage stability.

**Supplementary Table 35.** Costs of Li, Co, Ni, Mn, and Fe.

| **Metal** | **Average price in 1st quarter of 2024 (USD kg-1)1** |
| --- | --- |
| Li1 | 13.2 |
| Co2 | 28.4 |
| Ni2 | 16.6 |
| Mn1 | 1.13 |
| Fe1 | 0.12 |

1 Mineral price information was obtained from the Shanghai Metals Market and London Metal Exchange.
Li: https://www.metal.com/Lithium/202306050001
Ni: https://www.lme.com/en/Metals/Non-ferrous/LME-Nickel#Price+graphs
Co: https://www.lme.com/en/Metals/EV/LME-Cobalt#Price+graphs
Mn: https://www.metal.com/Manganese/201102250448
Fe: https://www.metal.com/Iron%20Ore%20Price/201904180018

**Supplementary Table 36.** Cost per energy of CAMs.

| **CAM** | **Capacity (mAh g-1)** | | **Energy density  (kWh g CAM-1)** | **Cost (USD (kg of CAM)-1)** | | | **Cost per Energy (USD kWh-1)** | |
| --- | --- | --- | --- | --- | --- | --- | --- | --- |
| LiCoO2 | 153 | 608 | | | 18.0 | 29.6 | |
| LiNi0.7Co0.15Mn0.15O2 | 185 | 704 | | | 10.7 | 15.1 | |
| LiNi0.5Mn1.5O4 | 132 | 613 | | | 3.68 | 6.0 | |
| LiFe0.5Mn1.5O4 | 132 | 576 | | | 1.04 | 1.8 | |

**Supplementary Table 37.** Comparison of the thicknesses of cell components in conventional and thick-electrode ASSBs.

| **Cell component** | **Thickness (μm)** | | | |
| --- | --- | --- | --- | --- |
| **Mono-cell** | **Bi-cell1** | **Ultrathick ASSB (Li metal anode)** | **Ultrathick ASSB (Anode-less)** |
| Al current collector | 15 | 15 | 15 | 15 |
| Cathode | 100 | 210 | 1400 | 1400 |
| SE layer (LPSCl) | 20 | 20 | 20 | 20 |
| Anode (Li metal) | 20 | 20 | 20 | 5 |
| SUS current collector | 10 | 10 | 10 | 10 |
| Package film | 240 | 240 | 240 | 240 |
| Total | 405 | 515 | 1705 | 1690 |

1 Schematic of the bi-cell configuration is illustrated below.


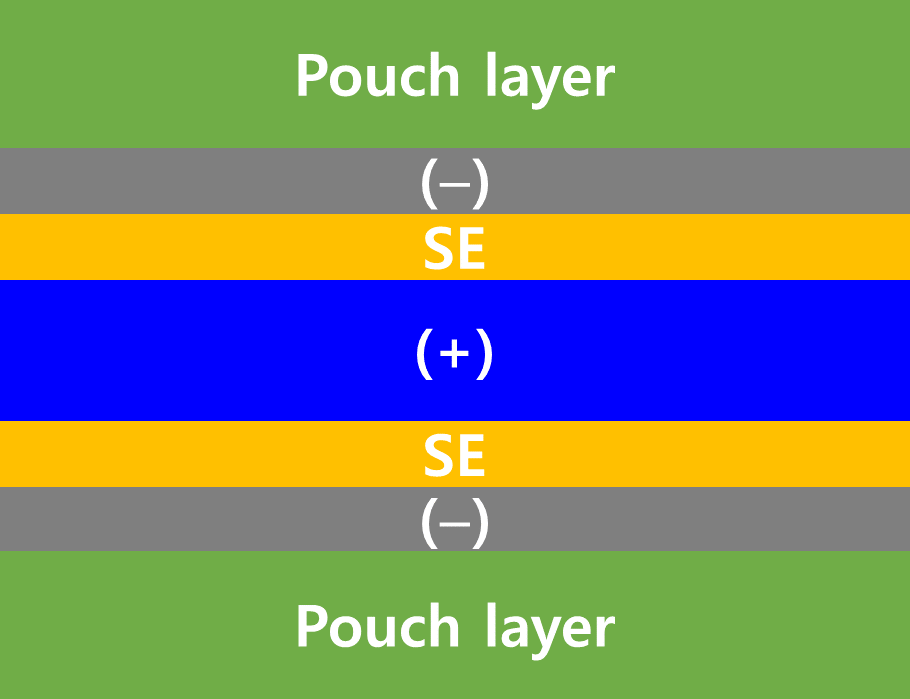


**Supplementary Fig.** Schematic of the bi-cell configuration.

**Supplementary Table 38.** Comparison of cell-level energy densities of different types of ASSB cells, with various areal capacities. Cell-level energy density was obtained using the parameters presented in Supplementary Table 37.

| **Cell type** | | | **Mass loading (mg cm-2)** | **Areal capacity (mAh cm-2)** | **Active material ratio (vol.%)** | **Average voltage (V)** | **Cell-level energy density** | |
| --- | --- | --- | --- | --- | --- | --- | --- | --- |
| **Cell name** | **Feature (mass loading level / CAM)** | **Cell configuration** | **Volumetric energy density (Wh L-1)** | **Specific energy density (Wh kg-1)** |
| C11 | Low / LNMO | LNOM||Li | 19 | 1.14 | 51 | 4.6 | 147 | 32.8 |
| C2 | High / NCM | NCM||Li | 25 | 5.0 | 46 | 3.8 | 469 | 137 |
| C32 | High / NCM | LiNi0.90Co0.05Mn0.05O2 anodeless with Ag−C interlayer Bi-cell | 32 | 13.6 | 66 | 3.8 | 703 | 260 |
| C4 | High / LNMO | LNMO||Li | 38.6 | 5.0 | 36 | 4.7 | 458 | 149 |
| UT1 | Ultrahigh / LNMO | LNMO||Li | 257.4 | 35.3 | 34 | 4.7 | 718 | 274 |
| UT2 | LNMO anodeless3 | 257.4 | 35.3 | 34 | 4.7 | 722 | 273 |
| UT3 | LNMO||Li Wide voltage | 257.4 | 65.4 | 34 | 3.7 | 970 | 389 |
| UT4 | LNMO||Li Bi-cell | 543.7 | 70.5 | 34 | 4.7 | 770 | 290 |
| UT5 | LNMO||Li Wide voltage & Bi-cell | 543.7 | 130.8 | 34 | 3.7 | 1037 | 412 |
| UT6 | LNMO||Li Wide voltage & Bi-cell | 823.8 | 209.2 | 66 | 3.7 | 1527 | 648 |

1 Reference S15; 2 Reference S28; 3 Assumption that the implementation of the Ag–C interlayer followed reference S28

**Supplementary Note 18.** Cell-level energy densities were calculated based on the electrodes, SE layer membranes, current collectors, and packaging films presented in Supplementary Table 18, and were determined taking into account the plated Li thickness. Compared with C4, LNMO||Li cells with a conventional high mass loading of 5.0 mAh cm-2, which are cells with ultrathick electrodes (UT1), exhibit a significant increase in their cell-based energy densities: a 57% increase in volumetric energy density (718 Wh L-1 vs. 458 Wh L-1). This figure already surpasses that of the current state-of-the-art ASSB technologies, such as that for C3.S28 Additionally, a wider voltage utilization down to 2.3 V (vs. Li/Li+) for UT3 has the potential to double the capacity, further increasing the energy density to 970 Wh L-1. Finally, a bi-cell design (stack no. = 1) results in a further increase to 1037 Wh L-1 (UT5). Additional room for enhancements can be accomplished by increasing the fraction of catholyte (UT6, 1527 Wh L-1). These estimates also show a substantial increase in the specific energy densities. For example, UT1, LNMO||Li cells with ultrathick electrodes, already achieve 278 Wh kg-1. Doubling the capacity through wide-voltage operation can lead to a value of 389 Wh kg-1, far surpassing the current state-of-the-art NCM ASSBs, C3, which achieve 260 Wh kg-1.S28

**Supplementary Table 39.** The ICP-OES results of two types of LNMO samples.

|  | Li | Ni | Mn |
| --- | --- | --- | --- |
| Disordered-LNMO | 1.08 | 0.47 | 1.44 |
| Ordered-LNMO | 1.02 | 0.52 | 1.46 |

**4. Supplementary References.**

1. Sorokin, N. I., Krimov, D. N., & Komar`kova, O. N. Electrophysical properties of LiYbF4 crystals. *Crystallogr. Rep.* **55**, 448–449 (2010).
2. Esaka, T., Okuyama, R., & Iwahara, H. Ionic conduction in sintered fluorocomplexes LimMF6, M= Al, Ti. *Solid State Ionics*, **34**, 201–205 (1989).
3. Oi, T. Ionic conductivity of amorphous mLiFnMF3 thin films (M = Al, Cr, Sc or Al + Sc). *Mater. Res. Bull.* **19**, 1343–1348 (1984).
4. Oi, T. Ionic conductivity of LiF thin films containing Di-or trivalent metal fluorides. *Mater. Res. Bull.* **19**, 451–457 (1984).
5. Ganasan, P. et al. Fluorine-Substituted Halide Solid Electrolytes with Enhanced Stability toward the Lithium Metal. *ACS Appl. Mater. Interfaces* **14**, 25448−25456 (2022).
6. Miyazaki, R. & Maekawa, H. Li+-ion conduction of Li3AlF6 mechanically milled with LiCl. *ECS Electrochem. Lett.* **6**, A87-A89 (2012).
7. Miyazaki, R. et al. Enhancement of the Li+ Conductivity of Li3AlF6 for Stable All-Solid-State Lithium-Ion Batteries. *ACS Appl. Energy Mater.* **7**, 2533–2541 (2024).
8. Hu, J. et al. Highly Conductive Doped Fluoride Solid Electrolytes with Solidified Ionic Liquid to Enable Reversible FeF3 Conversion Solid State Batteries. *Adv. Funct. Mater.* 2314044 (2024).
9. Yubuchi, S., et al. 5V class LiNi0.5Mn1.5O4 positive electrode coated with Li3PO4 thin film for all-solid-state batteries using sulfide solid electrolyte. *Solid State Ionics* **285**, 79-82 (2016)
10. Oh, G., et al. Bulk-Type All Solid-State Batteries with 5 V Class LiNi0.5Mn1.5O4 Cathode and Li10GeP2S12 Solid Electrolyte. *Chem. Mater.* **28**, 2634-2640 (2016)
11. Oh, G., et al. Effect of surface modification and oxygen deficiency on intercalation property of lithium nickel manganese oxide in an all-solid-state battery. *Solid State Ionics* **288**, 244-247 (2016)
12. Liu, G. et al. Passivation of the Cathode–Electrolyte Interface for 5 V-Class All-Solid-State Batteries. *ACS Appl. Mater. Interfaces* **12**, 28083-28090 (2020)
13. Ye, L. et al. Toward Higher Voltage Solid-State Batteries by Metastability and Kinetic Stability Design. *Adv. Energy Mater.* **10**, 2001569 (2020).
14. Wang, Y. et al. 5 V-class sulfurized spinel cathode stable in sulfide all-solid-state batteries. *Nano Energy* **90**, 106589 (2021).
15. Jang, J. et al. Enabling a Co-Free, High-Voltage LiNi0.5Mn1.5O4 Cathode in All-Solid-State Batteries with a Halide Electrolyte. *ACS Energy Lett.* **7**, 2531-2539 (2022).
16. Lee, H. J. et al. LiNi0.5Mn1.5O4 Cathode Microstructure for All-Solid-State Batteries. *Nano Lett.* **22**, 7477-7483 (2022)
17. Lee, D., et al. Interphase Stabilization of LiNi0.5Mn1.5O4 Cathode for 5 V-Class All-Solid-State Batteries. *Small* **20**, 2306053 (2024).
18. Yamada, H. et al. Structural evolution of amorphous precursors toward crystalline zeolites visualized by an in situ X-ray pair distribution function approach. J*. Phys. Chem. C* **123**, 28419–28426 (2019).
19. Woo, J. et al. Liquid-phase synthesis of highly deformable and air-stable Sn-substituted Li3PS4 for all-solid-state batteries fabricated and operated under low pressures. *Adv. Energy Mater.* **13**, 2203292 (2023).
20. Yubuchi, S. et al. Quantitative analysis of crystallinity in an argyrodite sulfide-based solid electrolyte synthesized via solution processing. *RSC Adv.* **9**, 14465–14471 (2019).
21. Henderson, G. S., Liu, X. & Fleet, M. E. A Ti L-edge X-ray absorption study of Ti-silicate glasses. *Phys. Chem. Miner.* **29**, 32–42 (2002)
22. W. Yao. et al. A 5 V-class cobalt-free battery cathode with high loading enabled by dry coating. *Energy Environ. Sci.* **16**, 1620-1630 (2023).
23. L. Zhou. et al. Li3–xZrx(Ho/Lu)1–xCl6 Solid Electrolytes Enable Ultrahigh-Loading Solid-State Batteries with a Prelithiated Si Anode. *ACS Energy Lett.* **8,** 3102-3111 (2023).
24. S. Wang. et al. Lithium Argyrodite as Solid Electrolyte and Cathode Precursor for Solid-State Batteries with Long Cycle Life. *Adv. Energy Mater.* **11**, 2101370 (2021).
25. Kwak, H. et al. Emerging halide superionic conductors for all-solid-state batteries: design, synthesis, and practical applications. *ACS Energy Lett.* **7**, 1776–1805 (2022).
26. Kwak, H. et al. Tuning the properties of halide nanocomposite solid electrolytes with diverse oxides for all-solid-state batteries. *ACS Appl. Mater. Interfaces* **16**, 49328–49336 (2024).
27. Han, Y. et al. Single- or Poly-Crystalline Ni-Rich Layered Cathode, Sulfide or Halide Solid Electrolyte: Which Will be the Winners for All-Solid-State Batteries? *Advanced Energy Materials* **11**, 2100126, (2021).
28. Lee, Y.-G. et al. High-energy long-cycling all-solid-state lithium metal batteries enabled by silver–carbon composite anodes. *Nat. Energy* **5**, 299-308 (2020).
